# Supplementary material for: How do we see fractures? Quantifying subjective bias in fracture data collection
Source: Copernicus journal article supplement (doi:10.5194/se-10-487-2019), 2019-04-11
Supplement: Supplementary file 1 [file Description of supplementary data.docx]

Description of supplementary data

| Number | Title | Description | File type |
| --- | --- | --- | --- |
| S1 | Participant Sheet | The sheet provided to participants which described the task and contained the participant questionnaire. | PDF |
| S2 | Individual responses to the participant questionnaire | Tabulated responses to the participant questionnaire. | .xlsx |
| S3 | Individual exercises for workshop participants | The workbook provided for individual tasks in workshop 1 and 2. | PDF |
| S4 | Group exercises for workshop participants | The workbook provided for group tasks in workshop 1 and 2. | PDF |
| S5 | Linear scanline data_ws and field | The raw data and derived fracture statistics for all linear scanlines undertaken both in the field and in the workshop. | .xlsx |
| S6 | Field circular scanline data | The raw data and derived fracture statistics for circular scanlines undertaken in the field. | .xlsx |
| S7 | Workshop circular scanline data. | The raw data and derived fracture statistics for circular scanlines undertaken in both workshops. | .xlsx |
| S8 | Workshop window sampling data. | The raw data and derived fracture statistics for circular scanlines undertaken in both workshops. | .xlsx |
| S9 | Digitised fracture traces and nodes for circle 8 | Circle 8 digitised fracture nodes and Nc points for participants from both workshops and fracture traces for those who marked them on the sheet. | ArcGIS project. |
