# Supplementary material for: How do we see fractures? Quantifying subjective bias in fracture data collection
Source: Copernicus journal article supplement (doi:10.5194/se-10-487-2019), 2019-04-11
Supplement: Supplementary file 2 [file S2_Individual responces to the participant questionaire.xlsx]

## Sheet: Sheet1
		Particient	Q1: What is your geological training?						Q2: How would you describe how familiar you are with geological fieldwork?						Q3: How would you describe how familiar you are with collecting fracture data?							Questions		Responces
			A	B	C	D	E	Equivalent value	A	B	C	D	R	Equivalent value	A	B	C	D	E	Equivalent value				A	B	C	D	E
	Workshop 1	P1			X			3			X			3		X				2		Q1	What is your geological training?	No formal training	Undergraduate degree	Postgraduate degree	Professional geologist	other (please specify)
		P2	X					1	X					1	X					1
		P3		X				2		X				2			X			3		Q2	How would you describe how familiar you are with geological fieldwork?	No experience	have experience of group fieldwork as part of undergrad/postgrad classes	have experience leading or assisting some fieldwork	have led or assisted numerous and/or extended field seasons	other (please specify)
		P4				X		4			X			3			X			3
		P5					X	99	X					1	X					1		Q3	How would you describe how familiar you are with collecting fracture data?	No experience	some experience as part of undergrad/postgrad classes	quite experienced; I have collected fracture data in several settings on several field excursions	very experienced; I have collected fracture data in a range of structural settings on numerous field excursions	other (please specify)
		P6		X				2			X			3		X				2
		P7					X	99					X	99	X					1
		P8			X			3			X			3			X			3
		P9	X					1					X	99			X			3
		P10				X		4				X		4				X		4
		P11			X			3			X			3			X			3
	Workshop 2	P12				X		4			X			3			X			3
		P13				X		4			X			3		X				2
		P14				X		4			X			3			X			3
		P15				X		4		X				2			X			3
		P16			X			3		X				2	X					1
		P17				X		4		X				2		X				2
		P18				X		4				X		4		X				2
		P19	X					1	X					1	X					1
		P20	X					1	X					1	X					1
		P21				X		4				X		4				X		4
		P22			X			3		X				2	X					1
		P23			X			3				X		4		X				2
		P24				X		4				X		4				X		4
		P25			X			3		X				2	X					1
		P26			X			3		X				2		X				2
		P27				X		4				X		4			X			3
		P28	X					1	X					1	X					1
		P29			X			3				X		4			X			3
