# Supplementary material for: How do we see fractures? Quantifying subjective bias in fracture data collection
Source: Copernicus journal article supplement (doi:10.5194/se-10-487-2019), 2019-04-11
Supplement: Supplementary file 3 [file S4_Group exercises for workshop participants.pdf › Resubmission_supplementary/S4_Group exercises for workshop participants.pdf]

# Investigating uncertainty in using outcrop data to characterise fracture networks

## Workshop exercises

### Part 2

(working in pairs or small groups)

User IDs:

-----

-----

-----

-----

Part 1B: Circle 1 (*radius 1 m*)

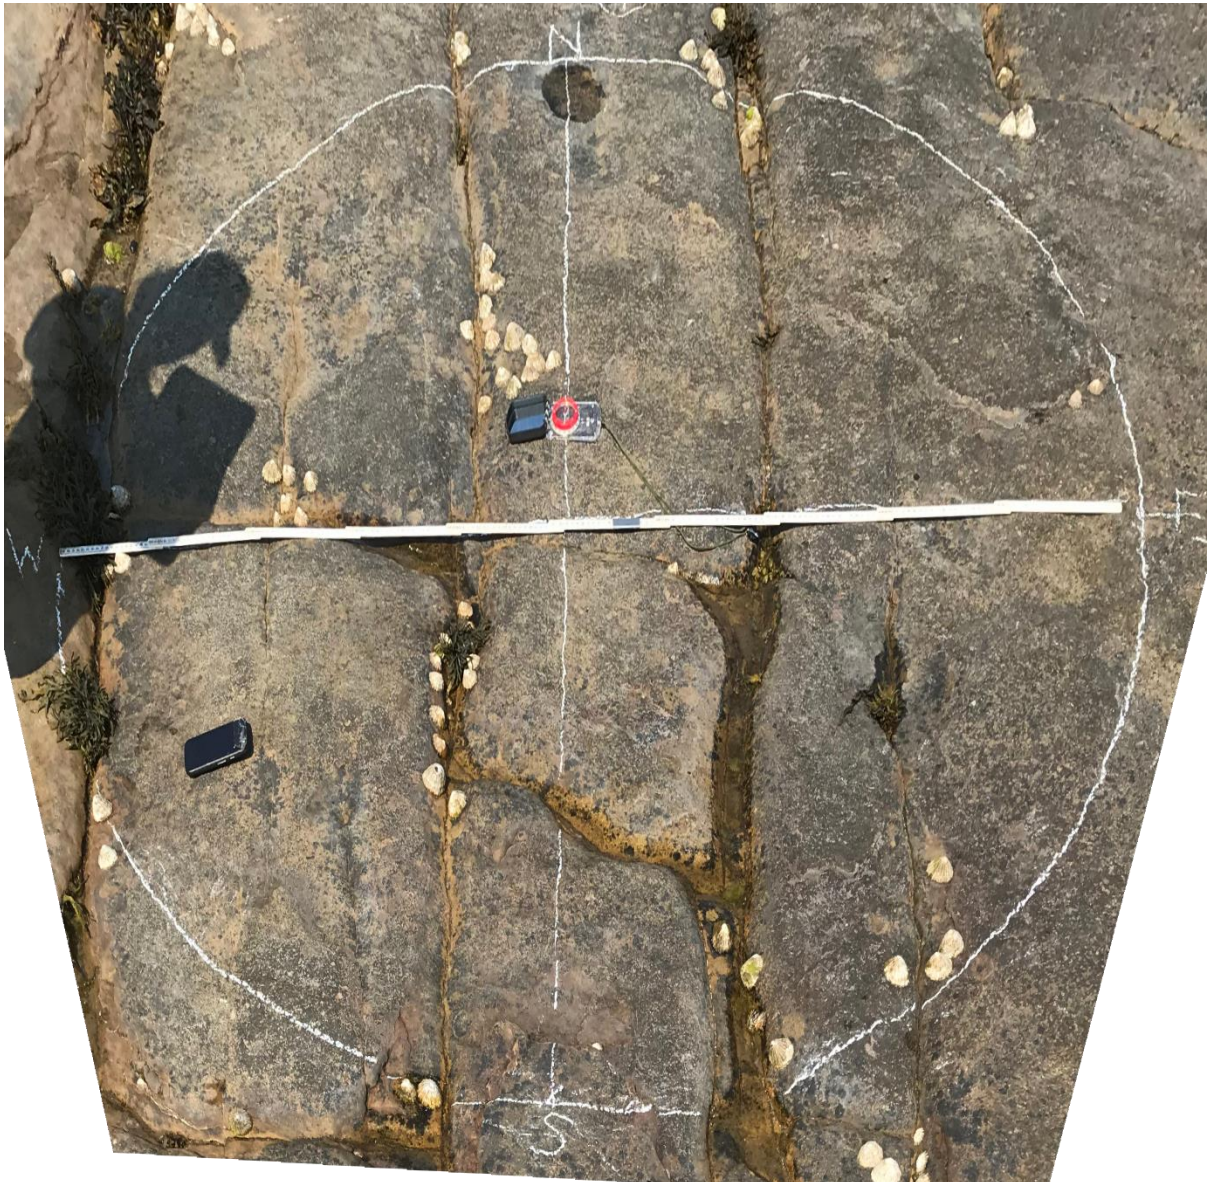

| Scanline Circumference |            | Fracture Nodes |      |      |            |
|------------------------|------------|----------------|------|------|------------|
| n(C)                   | Time taken | n(i)           | n(y) | n(x) | Time taken |
|                        |            |                |      |      |            |

...Any Comments?



Part 1B: Circle 2 (radius 1 m)

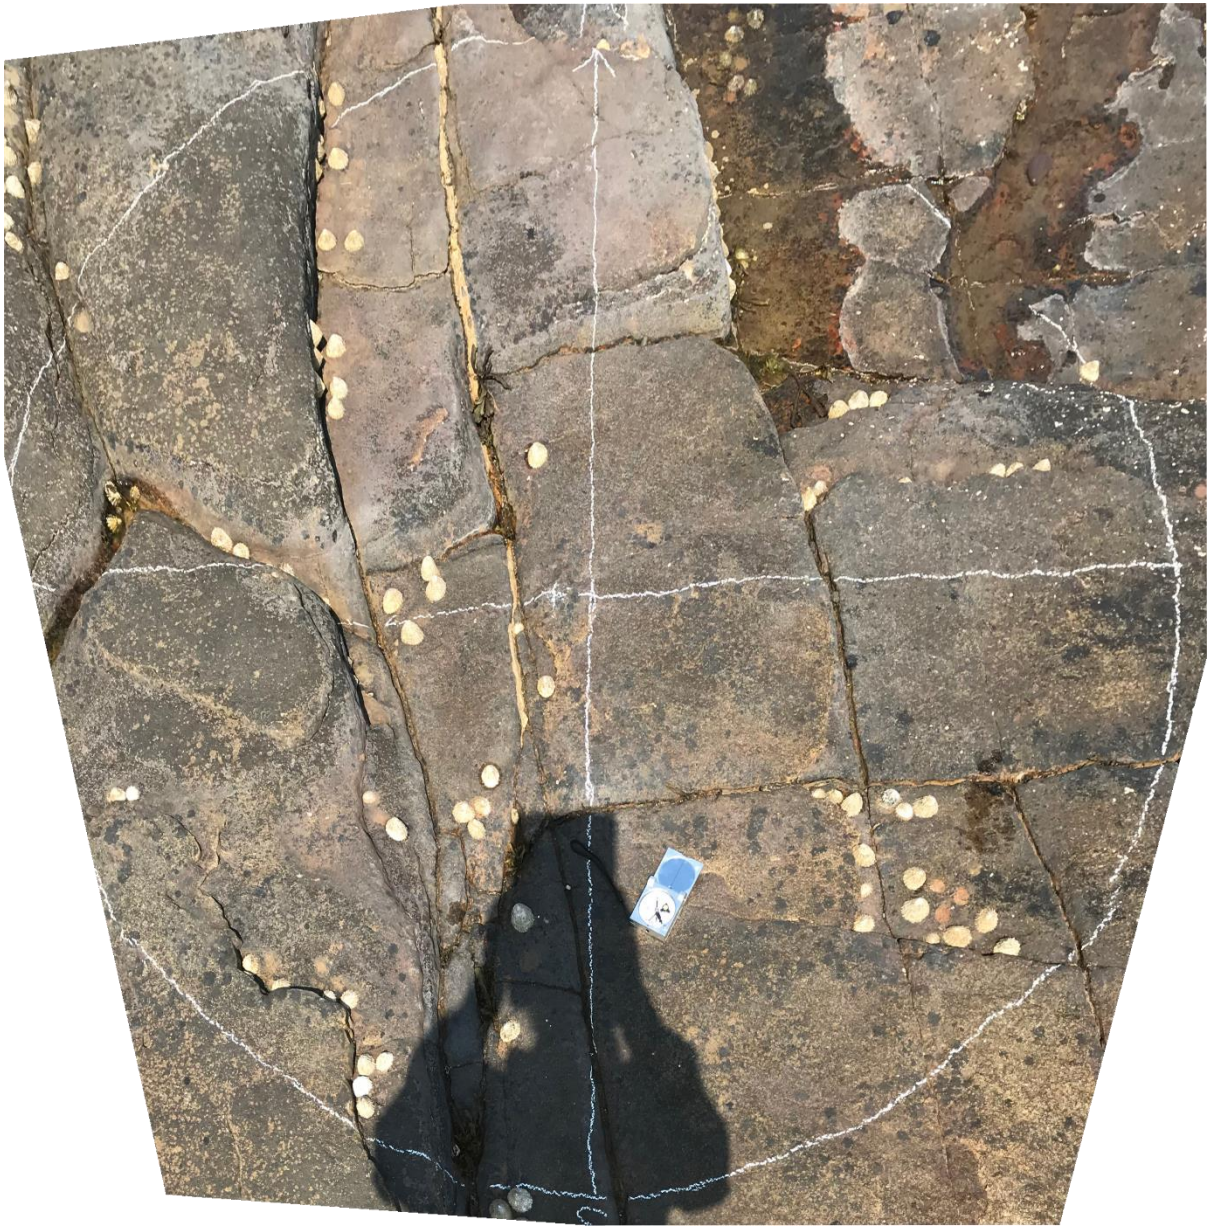

| Scanline Circumference |            | Fracture Nodes |      |      |            |
|------------------------|------------|----------------|------|------|------------|
| n(C)                   | Time taken | n(i)           | n(y) | n(x) | Time taken |
|                        |            |                |      |      |            |

...Any Comments?



## Part 1B: Linear Scanline

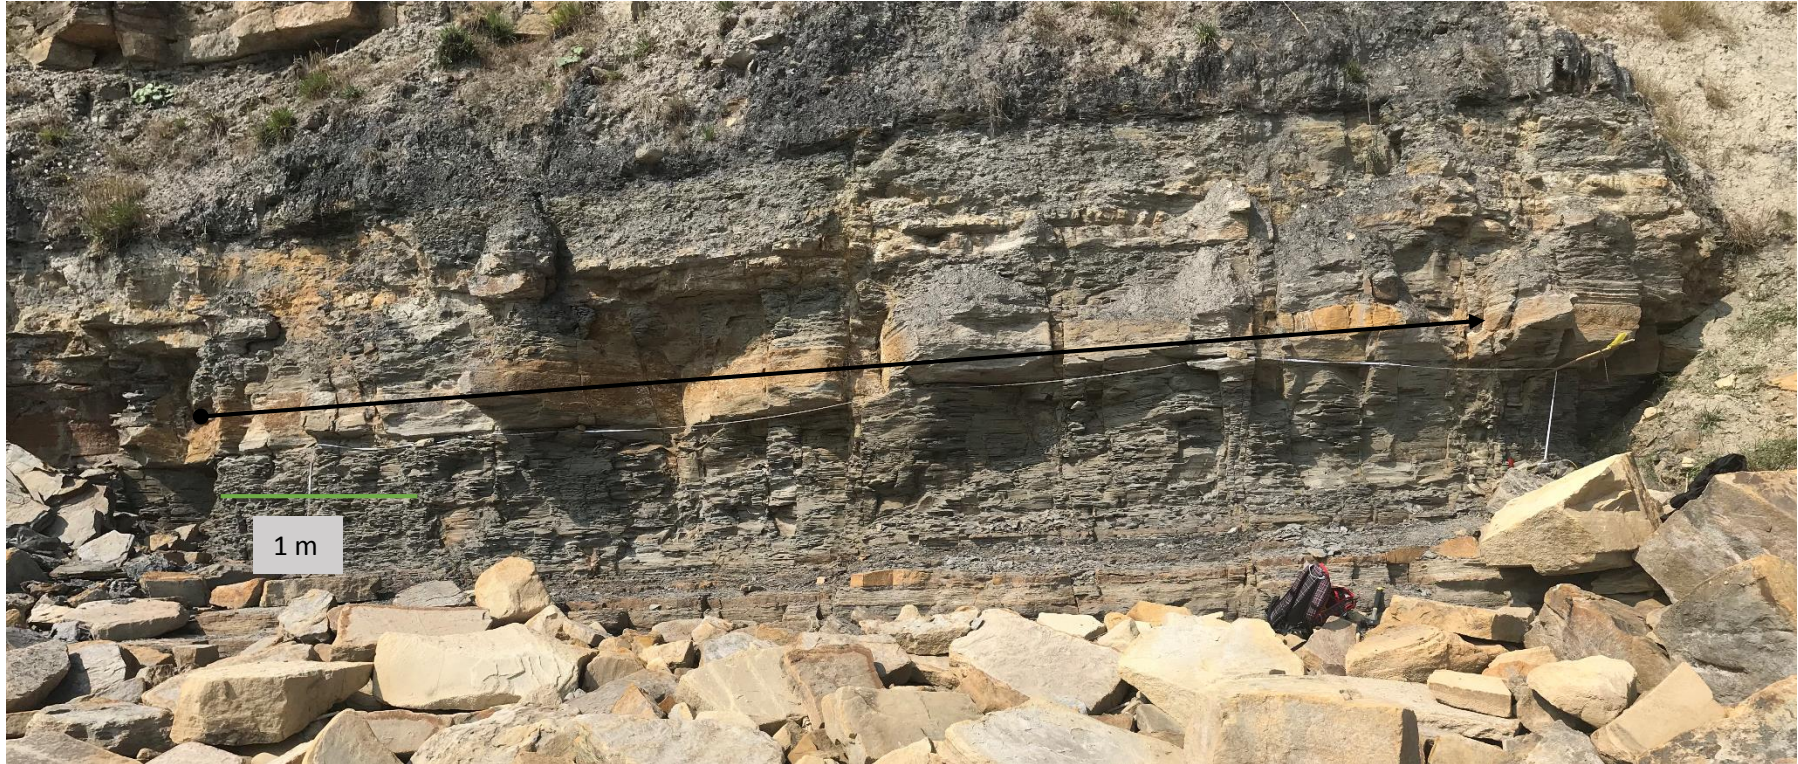

Time taken: \_\_\_\_\_

...Any Comments?
