# Supplementary material for: How do we see fractures? Quantifying subjective bias in fracture data collection
Source: Copernicus journal article supplement (doi:10.5194/se-10-487-2019), 2019-04-11
Supplement: Supplementary file 3 [file S5_Linear scanline data_ws and field_reviewedits.xlsx]

## Sheet: Summary
	Sheet/scanline	Length	Description
	L1	1.3 m	All sheets contains: A) a summary of raw and derived fracture statisics for the linear scnaline and B) the recorded values for each participant.
	L2	1.3 m
	L3	15.0 m
	L4	7.5 m
	L5	6.55 m
	L6	1.45 m
	Summary of linear scanlines
			Participant ID	# fractures	Trace length (Tl)			Spacing			f/m	Pf	censored	Time (mins)
					Mean	min	max	Mean	min	max
	Field	L1	A	8	1.05625	0.2	2.22	0.14125	0.02	0.41	6.15385	-	-	-
			B	10	0.617	0.15	2.17	0.148	0	0.31	7.69231	0.1	0.1	09:00:00
			C	6	0.63	0.25	1.62	0.17	0	0.41	4.61538	0.0833333	0.0833333	-
			D	4	0.5375	0.34	1.1	0.2325	0.02	0.54	3.07692	0	0.25	05:32:00
			F	3	0.38	0.3	0.45	0.316667	0.22	0.38	2.30769	0.333333	0	-
			G	10	0.246	0.025	1.14	0.11	0.01	0.3	7.69231	-	-	-
		L2	A + G	12	0.329583	0.01	1.78	0.0933333	0.01	0.23	9.23077	0.416667	0.291667	-
			B + C	14	0.488571	0.06	1.66	0.0928571	0.01	0.4	10.7692	0.214286	0	-
			D	7	0.462857	0.22	0.81	0.171429	0.01	0.49	5.38462	0.428571	0	-
		L3	G + F	26	0.799231	0.035	2.68	0.665	0.06	2.33	1.34715	0.826923	0	13:00:00
			C + D	21	1.96857	0.17	23.08	0.684762	0.08	2.53	1.4094	0.853659	0.0238095	10:00:00
			B + A	38	0.851316	0.06	8.77	0.455263	0.05	2.04	1.96891	0.855263	0	10:00:00
		L4	G + F	19	0.891579	0.045	4.03	0.363158	0.005	1.11	0.984456	0.526316	0	-
			A + B	18	3.69667	0.2	14.4	0.382222	0.01	1.67	0.932642	0.694444	0	-
	Workshop	L6	P1	10	0.288743	0.052459	0.60765	0.11235	0	0.360656	6.89655	0.4	0.35	05:14:00
			P2	14	0.165886	0.0459016	0.250273	0.0805621	0.00874317	0.272131	9.65517	0.392857	0.0714286	06:48:00
			P3	23	0.160135	0.0153581	0.48424	0.0492819	0.00407879	0.2943	15.8621	0.717391	0.0869565	02:17:00
			P4	17	0.148248	0.0273224	0.457923	0.0666024	0.00546448	0.330055	11.7241	0.441176	0.0588235	03:40:00
			P5	11	0.259811	0.0918033	0.48306	0.102832	0	0.328962	7.58621	0.181818	0.272727	08:40:00
			P6	22	0.159513	0.0153005	0.487432	0.0511177	0	0.298361	15.1724	0.272727	0.136364	05:26:00
			P7	13	0.225137	0.0896175	0.487432	0.086591	0	0.333333	8.96552	0.269231	0.192308	05:00:00
			P8	14	0.212334	0.100546	0.466667	0.080484	0.00874317	0.33224	9.65517	0.178571	0.25	04:56:00
			P9	12	0.243625	0.0994536	0.485246	0.0940801	0.00874317	0.330055	8.27586	0.0416667	0.375	04:00:00
			P10	17	0.241144	0.0699454	0.48306	0.0665381	0	0.331148	11.7241	0.323529	0.294118	-
			P11	19	0.160656	0.0284153	0.419672	0.059419	0.0010929	0.331148	13.1034	0.421053	0.0789474	03:23:00
			P12	22	0.195777	0.0371585	0.484153	4.29218	0.2745	26.535	15.1724	0.340909	0.204545	10:00:00
			P13	23	0.20575	0.0448087	0.518033	0.0491328	0.00546448	0.28306	15.8621	0.26087	0.173913	12:35:00
			P14	25	0.180608	0.0437158	0.489617	0.0477377	0	0.289617	17.2414	0.2	0.14	04:25:00
			P15	22	0.204421	0.0469945	0.486339	0.0545455	0.00546448	0.31694	15.1724	0.409091	0.204545	06:04:00
			P16	19	0.20115	0.0688525	0.487432	0.0592465	0	0.327869	13.1034	0.289474	0.157895	09:14:00
			P17	22	0.249578	0.0994536	0.66776	0.0513661	0	0.296175	15.1724	0.272727	0.159091	09:12:00
			P18	18	0.25677	0.110383	0.531148	0.0630237	0.00983607	0.293989	12.4138	0.166667	0.25	05:30:00
			P19	14	0.267135	0.0775956	0.508197	0.0808743	0	0.33224	9.65517	0.464286	0.0714286	07:40:00
			P20	15	0.302514	0.104918	0.580328	0.074827	0	0.327869	10.3448	0.333333	0.366667	09:18:00
			P21	24	0.214526	0.0469945	0.570492	0.0601093	0	0.289617	16.5517	0.354167	0.208333	04:21:00
			P22	16	0.232855	0.0655738	0.488525	0.070765	0	0.295082	11.0345	0.28125	0.15625	06:00:00
			P23	-	-	-	-	-	-	-	-	-	-	08:00:00
			P24	11	0.397417	0.22623	0.71694	0.102335	0.0295082	0.277596	7.58621	0.0909091	0.636364	05:00:00
			P25	24	0.202869	0.0338798	0.612022	0.0470401	0	0.30929	16.5517	0.375	0.291667	06:00:00
			P26	21	0.232266	0.0896175	0.486339	0.0538121	0	0.31694	14.4828	0.238095	0.309524	06:21:00
			P27	12	0.295719	0.143169	0.551913	0.0945355	0.0120219	0.286339	8.27586	0.583333	0.208333	03:08:00
			P28	9	0.313418	0.0830601	0.523497	0.124347	0	0.578142	6.2069	0.333333	0.222222	01:51:00
			P29	23	0.178095	0.0251366	0.488525	0.0487052	0	0.291803	15.8621	0.23913	0.108696	24:00
		L5	G1	22	0.545143	0.136986	1.53425	0.293275	0.0342466	0.986301	3.35878	0.181818	0.0681818	05:57:00
			G2	22	1.2556	0.116438	2.71918	0.292964	0.0136986	0.958904	3.35878	0.0454545	0.227273	07:33:00
			G3	31	0.789881	0.157534	1.90411	0.210561	0.0136986	0.958904	4.73282	0.483871	0.225806	07:11:00
			G4	22	0.566314	0.136986	1.5274	0.0671937	0.0124224	0.23913	3.35878	0.318182	0.113636	09:35:00
			G5	27	1.14231	0.116438	2.58904	0.0548654	0.00776398	0.236025	4.12214	0.12963	0.037037	9:35
			G6	20	0.936986	0.472603	1.60959	0.072205	0.0124224	0.237578	3.05344	0.225	0	05:00:00
			G7	26	0.738409	0.171233	2.43151	0.248683	0	0.760274	3.96947	0.0961538	0.0961538	05:57:00
			G8	19	1.01406	0.232877	2.26027	0.0993781	0.0177849	0.264759	2.90076	0.0789474	0.0263158	08:17:00
			G9	15	0.794064	0.219178	1.72603	0.429521	0.0645471	1.37957	2.29008	0.0333333	0	10:11:00
			G10	24	1.1738	0.136986	2.41781	0.267435	0.0662741	0.879893	3.66412	0.104167	0.0625	10:45:00
			G11	15	1.12146	0.554795	1.94521	0.430589	0.0801162	1.07708	2.29008	0.5	0.0333333	13:00:00
			G12	28	0.9682	0.212329	2.41781	0.233129	0.0294371	0.890352	4.27481	0.178571	0.0892857	05:28:00

## Sheet: L1
	A: Summary of Line 1																						B: Participant data
	P	N	T (min)	F	R	U	tl	Meadian tl	tl min	tl max	tl range	CoV	S	median S	Smin	S max	S range	CoV	f/m	Pf	censored
	A	8	-	-	-	-	1.05625	0.85	0.2	2.22	2.02	1.49706	0.14125	0.11	0.02	0.41	0.39	0.818182	6.15385	-	-		Participant G
	B	10	540	1	8	1	0.617	0.345	0.15	2.17	2.02	1.57971	0.148	0.17	0	0.31	0.31	0.75	7.69231	0.1	0.1		#	p (m)	L d (m)	L T	R d (m)	R T	s	tl
	C	6	-	1	10	1	0.63	0.325	0.25	1.62	1.37	1.85385	0.17	0.16	0	0.41	0.41	0.609375	4.61538	0.0833333	0.0833333		1	1.14	0.01	-	0.015	-	0.14	0.025
	D	4	332	0	6	2	0.5375	0.355	0.34	1.1	0.76	0.556338	0.2325	0.185	0.02	0.54	0.52	0.905405	3.07692	0	0.25		2	1.15	0.15	-	0.01	-	0.01	0.16
	F	3	-	2	4	0	0.38	0.39	0.3	0.45	0.15	0.192308	0.316667	0.35	0.22	0.38	0.16	0.228571	2.30769	0.333333	0		3	1.17	0.1	-	0.15	-	0.02	0.25
	G	10	-	-	-	-	0.246	0.12	0.025	1.14	1.115	2.03125	0.11	0.07	0.01	0.3	0.29	1.32143	7.69231	-	-		4	1.23	0.01	-	0.035	-	0.06	0.045
																							5	1.36	0.03	-	0.05	-	0.13	0.08
	Mean	6.83333	436	1	7	1	0.577792	0.3975	0.210833	1.45	1.23917	1.28509	0.186403	0.174167	0.045	0.391667	0.346667	0.77216	5.25641	0.129167	0.108333		6	1.4	0.08	-	0.23	-	0.04	0.31
	Median	7	436	1	7	1	0.57725	0.35	0.225	1.38	1.2425	1.53838	0.159	0.165	0.015	0.395	0.35	0.784091	5.38462	0.0916667	0.0916667		7	1.7	0.01	-	0.03	-	0.3	0.04
	min	3	332	0	4	0	0.246	0.12	0.025	0.45	0.15	0.192308	0.11	0.07	0	0.3	0.16	0.228571	2.30769	0	0		8	1.78	0.1	-	0.24	-	0.08	0.34
	max	10	540	2	10	2	1.05625	0.85	0.34	2.22	2.02	2.03125	0.316667	0.35	0.22	0.54	0.52	1.32143	7.69231	0.333333	0.25		9	1.84	0.05	-	0.02	-	0.06	0.07
	Range	7	208	2	6	2	0.81025	0.73	0.315	1.77	1.87	1.83894	0.206667	0.28	0.22	0.24	0.36	1.09286	5.38462	0.333333	0.25		10	2.1	0.86	-	0.28	-	0.26	1.14
	CoV	0.714286	0.238532	0.5	0.428571	0.5	0.359246	0.146429	0.555556	0.668478	0.811871	0.645998	0.465016	0.356061	1.16667	0.208861	0.314286	0.304899	0.714286	1.04545	0.818182
																							Participant F
	Scanline length		1.3 m																				#	p (m)	L d (m)	L T	R d (m)	R T	s	tl
																							1	1.38	0.2	R	0.19	F	0.38	0.39
																							2	1.6	0.1	R	0.35	F	0.22	0.45
																							3	1.95	0.17	R	0.13	R	0.35	0.3
																							Participant C
																							#	p (m)	L d (m)	L T	R d (m)	R T	s	tl
																							1	1.16	0.11	F	0.15	R	0.16	0.26
																							2	1.16	1.01	R	0	R	0	1.01
																							3	1.24	0.25	R	0	U	0.08	0.25
																							4	1.45	0.23	R	0.02	R	0.21	0.25
																							5	1.86	0.19	R	0.2	R	0.41	0.39
																							6	2.02	1.44	R	0.18	R	0.16	1.62
																							Participant D
																							#	p (m)	L d (m)	L T	R d (m)	R T	s	tl
																							1	1.16	0.22	U	0.13	U	0.16	0.35
																							2	1.37	0.17	R	0.17	R	0.21	0.34
																							3	1.91	0.92	R	0.18	R	0.54	1.1
																							4	1.93	0.18	R	0.18	R	0.02	0.36
																							Participant B
																							#	p (m)	L d (m)	L T	R d (m)	R T	S	tl
																							2	0.83	0.38	-	0.01	-	0.17	0.39
																							1	1	0.88	-	0.08	-	0.17	0.96
																							5	1.21	0.16	-	0.04	-	0.21	0.2
																							4	1.24	0.11	-	0.14	-	0.03	0.25
																							3	1.3	0.2	-	0.15	-	0.06	0.35
																							6	1.41	0.17	R	0.17	R	0.11	0.34
																							7	1.66	0.13	F	0.02	R	0.25	0.15
																							9	1.83	0.82	R	0.2	R	0.17	1.02
																							8	2.14	2	U	0.17	R	0.31	2.17
																							10	2.14	0.17	R	0.17	R	0	0.34
																							Participant A
																							#	p (m)	L d (m)	L T	R d (cm)	R T	s	tl
																							3	1.14	0.2		0		0.14	0.2
																							1	1.16	0.1		0.25		0.02	0.35
																							2	1.2	1.06		0.23		0.04	1.29
																							4	1.42	0.23		0.12		0.22	0.35
																							6	1.83	0.17		0.24		0.41	0.41
																							8	1.95	2		0.2		0.12	2.2
																							5	2.03	2		0.22		0.08	2.22
																							7	2.13	1.2		0.23		0.1	1.43

## Sheet: L2
	A: Summary of Line 2																						B: Participant data
	P	N	T (min)	F	R	U	Tl	tl median	tl min	tl max	range	CoV	S	S median	s min	s max	S range	S CoV	f/m	Pf	censored
	A and G	12	-	10	7	7	0.329583	0.195	0.01	1.78	1.77	0.75641	0.0933333	0.065	0.01	0.23	0.22	1.65385	9.23077	0.416667	0.291667		Participants A and G
	B and C	14	-	6	22	0	0.488571	0.315	0.06	1.66	1.6	1.10317	0.0928571	0.03	0.01	0.4	0.39	3.16667	10.7692	0.214286	0		#	p (m)	L d (m)	L T	R d (m)	R T	tl	s
	D	7	-	6	8	0	0.462857	0.28	0.22	0.81	0.59	1.58929	0.171429	0.08	0.01	0.49	0.48	2.625	5.38462	0.428571	0		1	0.12	0.045	R	0.14	R	0.185	0.12
																							2	0.16	0.03	R	0.14	F	0.17	0.04
	Mean	11		7.33333	12.3333	2.33333	0.427004	0.263333	0.0966667	1.41667	1.32	1.14962	0.119206	0.0583333	0.01	0.373333	0.363333	2.48184	8.46154	0.353175	0.0972222		3	0.29	0.01	R	0	R	0.01	0.13
	Median	12		6	8	0	0.462857	0.28	0.06	1.66	1.6	1.10317	0.0933333	0.065	0.01	0.4	0.39	2.625	9.23077	0.416667	0		4	0.52	0.2	F	0.03	F	0.23	0.23
	min	7		6	7	0	0.329583	0.195	0.01	0.81	0.59	0.75641	0.0928571	0.03	0.01	0.23	0.22	1.65385	5.38462	0.214286	0		5	0.59	0.32	F	0.04	F	0.36	0.07
	max	14		10	22	7	0.488571	0.315	0.22	1.78	1.77	1.58929	0.171429	0.08	0.01	0.49	0.48	3.16667	10.7692	0.428571	0.291667		6	0.61	0.01	F	0.06	F	0.07	0.02
	Range	7		4	15	7	0.158988	0.12	0.21	0.97	1.18	0.832875	0.0785714	0.05	1.11022e-16	0.26	0.26	1.51282	5.38462	0.214286	0.291667		7	0.63	1.08	R	0.7	F	1.78	0.02																	0.462857	0.171429
	CoV	0.291667		0.333333	0.9375	#DIV/0!	0.171746	0.214286	1.75	0.292169	0.36875	0.37749	0.420918	0.384615	5.55112e-15	0.325	0.333333	0.288156	0.291667	0.257143	#DIV/0!		10	0.69	0.08	U	0.2	U	0.28	0.06																	0.263547	0.185331
																							12	0.87	0.19	U	0	U	0.19	0.18
																							8	0.88	0.12	R	0.08	F	0.2	0.01															0.428571
																							9	0.92	0.07	F	0.03	U	0.1	0.04
	Scanline length		1.3 m																				11	1.12	0.38	U	0	U	0.38	0.2
																							Participants B and C
																							#	p (m)	L d (m)	L T	R d (m)	R T	tl	s
																							1	0.1	0.22	R	0.17	R	0.39	0.1
																							2	0.12	0.03	R	0.15	R	0.18	0.02
																							3	0.52	0.2	R	0.03	F	0.23	0.4
																							6	0.54	0.14	R	0.08	F	0.22	0.02
																							4	0.55	0.06	F	0	F	0.06	0.01
																							5	0.56	0.63	R	0.52	R	1.15	0.01
																							7	0.6	0.94	R	0.72	F	1.66	0.04
																							11	0.75	0.09	R	0.17	R	0.26	0.15
																							8	0.77	0.13	R	0.11	F	0.24	0.02
																							13	0.82	0.62	R	0.01	R	0.63	0.05
																							10	0.93	0.08	R	0.18	R	0.26	0.11
																							9	0.94	0.4	R	0.03	R	0.43	0.01
																							12	1.29	0.68	R	0.08	R	0.76	0.35
																							14	1.3	0.19	R	0.18	R	0.37	0.01
																							Participant D
																							#	p (m)	L d (m)	L T	R d (m)	R T	tl	s
																							1	0.15	0.3	R	0.36	R	0.66	0.15
																							2	0.52	0.25	f	0.03	f	0.28	0.37
																							3	0.55	0.24	f	0.01	f	0.25	0.03
																							4	0.56	0.13	R	0.09	f	0.22	0.01
																							5	0.64	0.12	R	0.69	f	0.81	0.08
																							6	1.13	0.65	R	0.1	R	0.75	0.49
																							7	1.2	0.12	R	0.15	R	0.27	0.07

## Sheet: L3
	A: Summary of Line 3																						B: Participant data
	P	N	T (min)	F	R	U	Tl	Tl median	tl min	tl max	tl range	CoV	S		s min	s max	s range	s CoV	f/m	Pf	censored
	G and F	26	13:00:00	43	9	0	0.799231	0.635	0.035	2.68	2.645	0.966535	0.665	0.51	0.06	2.33	2.27	0.980392	1.34715	0.826923	0		Participants G and F
	C and D	21	10:00:00	35	6	1	1.96857	0.55	0.17	23.08	22.91	0.890909	0.684762	0.46	0.08	2.53	2.45	1.71739	1.4094	0.853659	0.0238095		#	p (cm)	L d (cm)	L T	R d (cm)	R T	tl	s
	B and A	38	10:00:00	65	11	0	0.851316	0.435	0.06	8.77	8.71	1.05172	0.455263	0.3	0.05	2.04	1.99	1.45833	1.96891	0.855263	0		1	0.34	0.01	R	0.34	F	0.35	0.34
																							2	0.43	0.21	F	0.33	F	0.54	0.09
	Mean	28.3333		47.6667	8.66667	0.333333	1.20637	0.54	0.0883333	11.51	11.4217	0.969723	0.601675	0.423333	0.0633333	2.3	2.23667	1.38537	1.57515	0.845282	0.00793651		3	0.98	1.58	F	0.31	F	1.89	0.55
	Median	26	0.416667	43	9	0	0.851316	0.55	0.06	8.77	8.71	0.966535	0.665	0.46	0.06	2.33	2.27	1.45833	1.4094	0.853659	0		4	1.92	0.15	R	0.21	F	0.36	0.94
	min	21		35	6	0	0.799231	0.435	0.035	2.68	2.645	0.890909	0.455263	0.3	0.05	2.04	1.99	0.980392	1.34715	0.826923	0		5	4.25	1.06	F	1.62	F	2.68	2.33
	max	38		65	11	1	1.96857	0.635	0.17	23.08	22.91	1.05172	0.684762	0.51	0.08	2.53	2.45	1.71739	1.96891	0.855263	0.0238095		6	4.91	0.01	F	0.19	F	0.2	0.66
	Range	17		30	5	1	1.16934	0.2	0.135	20.4	20.265	0.160815	0.229499	0.21	0.03	0.49	0.46	0.736999	0.621762	0.0283401	0.0238095		7	5.5	0.09	F	0.51	R	0.6	0.59
	CoV	0.326923	0.15	0.348837	0.277778	#DIV/0!	0.686784	0.181818	1.125	1.16306	1.16332	0.0831915	0.172555	0.228261	0.25	0.10515	0.101322	0.252685	0.220577	0.0165992	#DIV/0!		8	5.96	0.6	F	0.17	F	0.77	0.46
																							9	7.43	0.24	F	0.2	R	0.44	1.47
																							10	8.4	0.31	F	0.045	F	0.355	0.97
																							11	9.05	0.66	R	0.01	F	0.67	0.65
																							12	9.19	0.37	R	1.12	F	1.49	0.14
																							13	9.8	0.3	F	0.4	F	0.7	0.61
																							14	10.07	0.09	F	0.9	F	0.99	0.27
																							15	10.4	1.25	F	0.25	F	1.5	0.33
																							16	10.75	0.25	F	0.63	F	0.88	0.35
																							17	11.22	0.05	F	0.14	F	0.19	0.47
																							18	11.5	0.02	F	0.05	R	0.07	0.28
																							19	11.59	0.03	F	0.005	F	0.035	0.09
	Scanline length				19.3 m	14.9 m																	20	12.19	0.1	F	0.25	F	0.35	0.6
																							21	13.08	0.56	R	0.22	F	0.78	0.89
																							22	14.31	0.27	F	0.09	F	0.36	1.23
																							23	14.37	0.9	F	0.01	F	0.91	0.06
																							24	14.83	1.45	F	0.47	R	1.92	0.46
																							25	15.28	0.04	F	0.42	F	0.46	0.45
																							26	17.29	0.4	F	0.89	F	1.29	2.01
																							Participants C and D
																							#	p (cm)	L d (cm)	L T	R d (cm)	R T	tl	s
																							1	0.33	0.1	r	0.33	f	0.43	0.33
																							2	0.44	0.22	f	0.34	f	0.56	0.11
																							3	0.98	0.23	f	0.32	f	0.55	0.54
																							4	1.92	0.23	r	0.22	f	0.45	0.94
																							5	4.45	22	U	1.08	f	23.08	2.53
																							6	4.64	0.17	f	0	f	0.17	0.19
																							7	4.74	0.41	f	0	f	0.41	0.1
																							8	4.9	0	f	0.43	f	0.43	0.16
																							9	5.95	0.64	f	0.15	f	0.79	1.05
																							10	7.4	0.35	f	0.2	f	0.55	1.45
																							11	9.09	0.09	f	0.68	r	0.77	1.69
																							12	9.19	2	r	4.1	f	6.1	0.1
																							13	9.79	0.1	f	0.43	f	0.53	0.6
																							14	10.1	0.05	f	0.87	f	0.92	0.31
																							15	10.5	0.4	f	0.6	f	1	0.4
																							16	10.74	0.25	f	0.2	f	0.45	0.24
																							17	11.2	0.32	f	0.11	f	0.43	0.46
																							18	12.18	0.28	f	0.1	f	0.38	0.98
																							19	13.07	0.87	r	0.24	f	1.11	0.89
																							20	14.3	1.81	r	0.1	f	1.91	1.23
																							21	14.38	0	f	0.32	f	0.32	0.08
																							Participants B and A
																							#	p (cm)	L d (cm)	L T	R d (cm)	R T	tl	s
																							1	0.34	0.38	F	0.01	R	0.39	0.34
																							2	0.44	0.42	F	0.2	F	0.62	0.1
																							3	0.98	0.33	F	0.2	F	0.53	0.54
																							4	1.14	0.01	R	0.15	R	0.16	0.16
																							5	1.92	0.25	F	0.1	F	0.35	0.78
																							6	3.12	0.18	F	0.34	R	0.52	1.2
																							7	4.45	8	F	0.77	F	8.77	1.33
																							8	4.63	0	F	0.16	F	0.16	0.18
																							9	4.69	0	F	0.06	F	0.06	0.06
																							10	4.74	0	F	0.28	F	0.28	0.05
																							11	4.9	0.2	F	0	F	0.2	0.16
																							12	5.6	0.16	F	0.2	R	0.36	0.7
																							13	5.68	0	F	0.07	F	0.07	0.08
																							14	5.89	0.05	F	0.16	F	0.21	0.21
																							15	5.95	0.17	F	0.57	F	0.74	0.06
																							16	6.09	0.26	F	0.21	F	0.47	0.14
																							17	6.16	0.05	F	0.01	R	0.06	0.07
																							18	7.4	0.22	F	0.23	F	0.45	1.24
																							19	7.77	0.37	F	0.14	R	0.51	0.37
																							20	7.91	0.2	F	0.06	R	0.26	0.14
																							21	8.4	0.04	F	0.31	F	0.35	0.49
																							22	9.09	0.68	F	1.1	F	1.78	0.69
																							23	9.22	0.28	F	0.32	F	0.6	0.13
																							24	9.79	0.4	F	0.14	F	0.54	0.57
																							25	9.9	0	F	0.87	R	0.87	0.11
																							26	10.08	0.98	F	0.13	F	1.11	0.18
																							27	10.16	0.11	F	0.03	F	0.14	0.08
																							28	10.42	0.38	F	0.5	F	0.88	0.26
																							29	10.6	0.1	F	0.15	R	0.25	0.18
																							30	10.76	0.18	F	0.2	F	0.38	0.16
																							31	11.22	0.32	F	0.1	F	0.42	0.46
																							32	11.8	0.04	R	0.07	F	0.11	0.58
																							33	12.19	0.26	F	0.11	F	0.37	0.39
																							34	13.07	0.26	F	0.72	F	0.98	0.88
																							35	14.3	0.1	F	1.8	F	1.9	1.23
																							36	14.8	0.65	F	4	F	4.65	0.5
																							37	15.26	0.44	F	0.1	F	0.54	0.46
																							38	17.3	0.94	F	0.37	F	1.31	2.04

## Sheet: L4
	A: Summary of Line 4																						B: Participant data
	P	N	T (min)	F	R	U	Tl	Tl median	tl min	tl max	Tl range	Cov	S	s median	s min	s max	s range	CoV	f/m	Pf	censored
	G and F	19	-	20	18	0	0.891579	0.36	0.045	4.03	3.985	2.44444	0.363158	0.21	0.005	1.11	1.105	2.57143	0.984456	0.526316	0		Participants G and F
	C and D	18	-	25	11	0	3.69667	1.98	0.2	14.4	14.2	1.91793	0.382222	0.255	0.01	1.67	1.66	2.10784	0.932642	0.694444	0		#	p (cm)	L d (cm)	L T	R d (cm)	R T	tl	s
																							1	0.19	0.28	F	0.51	R	0.79	0.19
																							2	0.29	0.15	R	0.07	R	0.22	0.1
	Mean	18.5		22.5	14.5	0	2.29412	1.17	0.1225	9.215	9.0925	2.18119	0.37269	0.2325	0.0075	1.39	1.3825	2.33964	0.958549	0.61038	0		3	0.295	0.005	F	0.04	F	0.045	0.005
	Median	18.5		22.5	14.5	0	2.29412	1.17	0.1225	9.215	9.0925	2.18119	0.37269	0.2325	0.0075	1.39	1.3825	2.33964	0.958549	0.61038	0		4	0.41	0.15	R	0.27	R	0.42	0.115
	min	18		20	11	0	0.891579	0.36	0.045	4.03	3.985	1.91793	0.363158	0.21	0.005	1.11	1.105	2.10784	0.932642	0.526316	0		5	1.32	0.13	R	0.04	R	0.17	0.91
	max	19		25	18	0	3.69667	1.98	0.2	14.4	14.2	2.44444	0.382222	0.255	0.01	1.67	1.66	2.57143	0.984456	0.694444	0		6	1.99	0.16	R	0.2	R	0.36	0.67
	Range	1		5	7	0	2.80509	1.62	0.155	10.37	10.215	0.526515	0.0190643	0.045	0.005	0.56	0.555	0.463585	0.0518135	0.168129	0		7	2.3	1.81	F	0.51	R	2.32	0.31
	CoV	0.027027		0.111111	0.241379	#DIV/0!	0.611364	0.692308	0.632653	0.56267	0.561727	0.120695	0.0255767	0.0967742	0.333333	0.201439	0.200723	0.0990721	0.027027	0.137725	#DIV/0!		8	2.39	0.005	R	0.13	R	0.135	0.09
																							9	3.5	1.78	F	0.64	F	2.42	1.11
																							10	4.09	1.15	R	2.88	F	4.03	0.59
																							11	4.3	0.25	F	0.05	F	0.3	0.21
																							12	5.2	0.6	R	0.68	F	1.28	0.9
	Scanline length				7.5 m																		14	5.81	0.02	R	0.19	F	0.21	0.61
																							13	5.86	0.4	R	0.26	F	0.66	0.05
																							15	5.865	0.07	R	0.08	F	0.15	0.005
																							16	5.9	0.17	F	0.02	F	0.19	0.035
																							17	5.93	0.27	F	0.61	R	0.88	0.03
																							18	6.29	0.18	F	0.16	R	0.34	0.36
																							19	6.9	1.58	R	0.44	F	2.02	0.61
																							Participants C and D
																							#	p (cm)	L d (cm)	L T	R d (cm)	R T	tl	s
																							1	0.2	2.5	F	1.62	F	4.12	0.2
																							2	0.29	0.94	F	0.55	R	1.49	0.09
																							3	0.34	0.33	F	0.11	R	0.44	0.05
																							4	0.35	0.15	F	0.47	F	0.62	0.01
																							10	0.37	9.4	F	5	F	14.4	0.02
																							5	0.41	0.16	R	0.47	R	0.63	0.04
																							6	1.31	0.16	R	0.33	R	0.49	0.9
																							7	1.99	0.18	R	1.2	F	1.38	0.68
																							8	2.3	11	F	1.6	F	12.6	0.31
																							9	2.68	0.41	R	0.22	R	0.63	0.38
																							11	3.52	1.77	F	2.75	R	4.52	0.84
																							12	4.1	2.05	F	4.5	F	6.55	0.58
																							13	4.2	1.78	F	1.95	F	3.73	0.1
																							14	5.87	0.41	F	0.2	F	0.61	1.67
																							15	5.9	0.13	F	0.07	F	0.2	0.03
																							16	5.94	1.29	F	7.4	F	8.69	0.04
																							17	6.3	1.37	R	1.6	F	2.97	0.36
																							18	6.88	0.47	F	2	F	2.47	0.58

## Sheet: L5
	A: Summery of Line 5																						B: Participant data											Group 7
	G	N	T (min)	F	R	U	Tl	tl median	tl min	tl max	range	CoV	S	median	s min	s max	range	CoV	f/m	Pf	censored													#	p (m)	L d (m)	L T	R d (m)	R T	raw tl	p (scaled)	s (scaled)	tl (scaled)
	G1	22	357	8	33	3	0.545143	0.376712	0.136986	1.53425	1.39726	1.50909	0.293275	0.188356	0.0342466	0.986301	0.952055	1.48182	3.35878	0.181818	0.0681818		Group 1																			0
	G2	22	453	2	32	10	1.2556	1.13699	0.116438	2.71918	2.60274	0.835843	0.292964	0.15411	0.0136986	0.958904	0.945205	2.31111	3.35878	0.0454545	0.227273		#	p (m)	L d (m)	L T	R d (m)	R T	raw tl	p (scaled)	s (scaled)	tl (scaled)		1	0.15	0.08	R	0.31	R	0.39	0.10274	0.10274	0.267123
	G3	31	431	30	18	14	0.789881	0.520548	0.157534	1.90411	1.74658	1.36184	0.210561	0.130137	0.0136986	0.958904	0.945205	1.57895	4.73282	0.483871	0.225806										0			2	0.36	0.14	R	0.34	R	0.48	0.246575	0.143836	0.328767
	G4	22	575	14	25	5	0.566314	0.517123	0.136986	1.5274	1.39041	0.821192	0.0671937	0.0419255	0.0124224	0.23913	0.226708	1.51852	3.35878	0.318182	0.113636		1	0.13	0.73	f	0.42	u	1.15	0.0890411	0.0890411	0.787671		3	0.79	0.15	R	0.19	R	0.34	0.541096	0.294521	0.232877
	G5	27	540	7	45	2	1.14231	0.945205	0.116438	2.58904	2.4726	1.02536	0.0548654	0.0295031	0.00776398	0.236025	0.228261	1.31579	4.12214	0.12963	0.037037		2	1.03	0.26	r	0.29	u	0.55	0.705479	0.616438	0.376712		4	1.02	0.3	R	0.24	R	0.54	0.69863	0.157534	0.369863
	G6	20	300	9	31	0	0.936986	0.883562	0.472603	1.60959	1.13699	0.344961	0.072205	0.0504658	0.0124224	0.237578	0.225155	1.21538	3.05344	0.225	0		3	1.29	0.3	r	0.25	r	0.55	0.883562	0.178082	0.376712		5	1.18	0.43	R	0	R	0.43	0.808219	0.109589	0.294521
	G7	26	357	5	42	5	0.738409	0.349315	0.171233	2.43151	2.26027	2.90196	0.248683	0.15411	0	0.760274	0.760274	1.85556	3.96947	0.0961538	0.0961538		4	1.92	0.8	r	1.31	r	2.11	1.31507	0.431507	1.44521		6	1.29	0.55	R	1.48	U	2.03	0.883562	0.0753425	1.39041
	G8	19	497	3	34	1	1.01406	0.856164	0.232877	2.26027	2.0274	1.048	0.0993781	0.0873197	0.0177849	0.264759	0.246974	1.06058	2.90076	0.0789474	0.0263158		5	2.82	0.41	f	0.46	f	0.87	1.93151	0.616438	0.59589		7	1.29	0	F	0.25	R	0.25	0.883562	0	0.171233
	G9	15	611	1	29	0	0.794064	0.732877	0.219178	1.72603	1.50685	0.920561	0.429521	0.368902	0.0645471	1.37957	1.31502	1.16306	2.29008	0.0333333	0		6	3.31	0.58	f	0.82	r	1.4	2.26712	0.335616	0.958904		8	2.01	0.2	R	0.05	R	0.25	1.37671	0.493151	0.171233
	G10	24	645	5	40	3	1.1738	1.12671	0.136986	2.41781	2.28082	0.642857	0.267435	0.157697	0.0662741	0.879893	0.813619	1.73359	3.66412	0.104167	0.0625		7	3.77	0.28	r	0.16	r	0.44	2.58219	0.315068	0.30137		9	2.31	0.14	R	0.21	R	0.35	1.58219	0.205479	0.239726
	G11	15	780	15	14	1	1.12146	1.00685	0.554795	1.94521	1.39041	0.408163	0.430589	0.225995	0.0801162	1.07708	0.996967	2.2126	2.29008	0.5	0.0333333		8	4.2	0.3	f	0.25	r	0.55	2.87671	0.294521	0.376712		10	3.02	0.48	R	1.26	R	1.74	2.06849	0.486301	1.19178
	G12	28	328	10	41	5	0.9682	1.07534	0.212329	2.41781	2.20548	0.652866	0.233129	0.174282	0.0294371	0.890352	0.860915	0.953927	4.27481	0.178571	0.0892857		9	4.77	0.15	f	0.13	r	0.28	3.26712	0.390411	0.191781		11	3.6	0.47	R	1.38	R	1.85	2.46575	0.39726	1.26712
																							10	4.82	0.14	f	1.23	r	1.37	3.30137	0.0342466	0.938356		12	4.18	0.73	R	1.39	R	2.12	2.86301	0.39726	1.45205
																							11	5.07	0.6	f	0.15	r	0.75	3.4726	0.171233	0.513699		13	4.84	1.65	R	1.9	U	3.55	3.31507	0.452055	2.43151
	Mean	22.5833	489.5	9.08333	32	4.08333	0.92052	0.79395	0.222032	2.09018	1.86815	1.03939	0.224983	0.1469	0.0293677	0.739064	0.709696	1.53341	3.44784	0.197927	0.0816269		12	6.3	0.83	u	1.04	r	1.87	4.31507	0.842466	1.28082		14	5.06	0.38	F	0.3	F	0.68	3.46575	0.150685	0.465753
	Median	20	497	7.5	32.5	3	0.9682	0.520548	0.164384	2.10274	1.88699	0.878202	0.240906	0.15411	0.0157418	0.885122	0.837267	1.50017	3.35878	0.154101	0.0653409		13	6.4	0.22	r	0.65	f	0.87	4.38356	0.0684932	0.59589		15	5.23	0.17	R	0.18	F	0.35	3.58219	0.116438	0.239726
	min	15	300	1	14	0	0.545143	0.349315	0.116438	1.5274	1.13699	0.344961	0.0548654	0.0295031	0	0.236025	0.225155	0.953927	2.29008	0.0333333	0		14	7.84	0.35	r	1.89	r	2.24	5.36986	0.986301	1.53425		16	6.34	0.68	R	0.62	R	1.3	4.34247	0.760274	0.890411
	max	31	780	30	45	14	1.2556	1.13699	0.554795	2.71918	2.60274	2.90196	0.430589	0.368902	0.0801162	1.37957	1.31502	2.31111	4.73282	0.5	0.227273		15	8.13	0.17	r	0.04	r	0.21	5.56849	0.19863	0.143836		17	6.43	0.95	R	0.47	F	1.42	4.40411	0.0616438	0.972603
	Range	16	480	29	31	14	0.710461	0.787671	0.438356	1.19178	1.46575	2.557	0.375724	0.339399	0.0801162	1.14354	1.08986	1.35718	2.44275	0.466667	0.227273		16	8.31	0.18	r	0.04	r	0.22	5.69178	0.123288	0.150685		18	7.4	0.67	R	0.23	R	0.9	5.06849	0.664384	0.616438
	CoV	0.4	0.574447	0.866667	0.376923	1.33333	0.208877	0.473684	0.520833	0.344463	0.46098	0.542126	0.832097	0.646907	1.8676	0.799213	0.841574	0.374479	0.295455	1.0152	1.05517		17	8.53	0.19	r	0.04	r	0.23	5.84247	0.150685	0.157534		19	7.66	0.24	R	2.1	U	2.34	5.24658	0.178082	1.60274
																							18	8.72	0.21	r	0.03	r	0.24	5.9726	0.130137	0.164384		20	7.85	0.7	R	1.93	U	2.63	5.37671	0.130137	1.80137
																							19	9.14	0.14	r	0.1	r	0.24	6.26027	0.287671	0.164384		21	8.03	2.07	U	0.48	R	2.55	5.5	0.123288	1.74658
																							20	9.22	0.11	r	0.09	r	0.2	6.31507	0.0547945	0.136986		22	8.14	0.18	R	0.11	R	0.29	5.57534	0.0753425	0.19863
																							21	9.33	0.1	r	0.21	r	0.31	6.39041	0.0753425	0.212329		23	8.28	0.19	R	0.06	R	0.25	5.67123	0.0958904	0.171233
																							22	9.42	0.55	r	0.31	r	0.86	6.45205	0.0616438	0.589041		24	8.53	0.22	R	0.08	R	0.3	5.84247	0.171233	0.205479
																																		25	8.72	0.22	R	0.09	R	0.31	5.9726	0.130137	0.212329
																							Group 2											26	9.44	0.28	R	0.11	R	0.39	6.46575	0.493151	0.267123
																							#	p (m)	L d (m)	L T	R d (m)	R T	raw tl	p (scaled)	s (scaled)	tl (scaled)
																															0			Group 8
																							1	0.37	0.85	r	1.48	u	2.33	0.253425	0.253425	1.59589		#	p (m)	L d (m)	L T	R d (m)	R T	raw tl	p (scaled)	s (scaled)	tl (scaled)
																							2	1.03	0.48	r	0.52	r	1	0.705479	0.452055	0.684932										0
																							3	1.22	1.15	r	0	r	1.15	0.835616	0.130137	0.787671		1	0.339315	1.26	r	0.46	r	1.72	0.0674021	0.0674021	1.17808
	Scanline length				6.55 m																		4	1.31	0.72	r	1.66	u	2.38	0.89726	0.0616438	1.63014		2	0.778899	0.75	f	0.53	r	1.28	0.154722	0.0873197	0.876712
	Correction				1 m = 1.46																		5	1.33	0.09	f	1.6	u	1.69	0.910959	0.0136986	1.15753		3	0.996951	0.29	r	0.31	r	0.6	0.198036	0.0433142	0.410959
																							6	2.18	0.52	r	0.92	r	1.44	1.49315	0.582192	0.986301		4	1.36197	0.25	r	0.29	r	0.54	0.270545	0.0725088	0.369863
																							7	2.87	0.54	u	0.39	r	0.93	1.96575	0.472603	0.636986		5	2.16717	0.64	r	0.81	r	1.45	0.43049	0.159945	0.993151
																							8	3.34	1.06	r	1.38	r	2.44	2.28767	0.321918	1.67123		6	2.89022	1.22	r	1.13	r	2.35	0.574118	0.143629	1.60959
																							9	4.22	0.97	r	1.3	r	2.27	2.89041	0.60274	1.55479		7	3.591	0.25	r	0.51	r	0.76	0.713322	0.139204	0.520548
																							10	4.83	1.78	r	1.99	u	3.77	3.30822	0.417808	2.58219		8	4.17426	0.68	r	1.13	r	1.81	0.829183	0.11586	1.23973
																							11	4.89	0.13	f	1.63	r	1.76	3.34932	0.0410959	1.20548		9	4.77658	1.47	f	1.83	r	3.3	0.948828	0.119645	2.26027
																							12	5.07	1.39	r	0.24	r	1.63	3.4726	0.123288	1.11644		10	5.03419	2.19	u	0.31	r	2.5	1	0.0511719	1.71233
																							13	6.35	0.98	r	2	u	2.98	4.34932	0.876712	2.0411		11	6.36704	0.82	r	0.28	f	1.1	1.26476	0.264759	0.753425
																							14	6.44	1.11	r	2	u	3.11	4.41096	0.0616438	2.13014		12	6.45657	0.28	r	0.97	r	1.25	1.28254	0.0177849	0.856164
																							15	7.84	1.87	r	2.1	u	3.97	5.36986	0.958904	2.71918		13	7.36325	0.52	r	0.26	r	0.78	1.46265	0.180104	0.534247
																							16	8.03	2.22	r	1.28	r	3.5	5.5	0.130137	2.39726		14	7.68657	0.16	r	0.19	r	0.35	1.52687	0.0642251	0.239726
																							17	8.15	0.17	r	0	r	0.17	5.58219	0.0821918	0.116438		15	7.86116	2.33	r	0.97	r	3.3	1.56155	0.034681	2.26027
																							18	8.3	0.19	r	0	r	0.19	5.68493	0.10274	0.130137		16	8.02029	1.92	r	1.11	r	3.03	1.59316	0.0316098	2.07534
																							19	8.56	0.2	r	0	r	0.2	5.86301	0.178082	0.136986		17	8.70086	0.65	r	0.22	r	0.87	1.72835	0.135189	0.59589
																							20	8.74	0.41	r	1.22	r	1.63	5.9863	0.123288	1.11644		18	9.40817	0.55	r	0.25	r	0.8	1.86886	0.140502	0.547945
																							21	9.29	0.55	u	0	r	0.55	6.36301	0.376712	0.376712		19	9.50548	0.23	r	0.11	r	0.34	1.88818	0.0193286	0.232877
																							22	9.41	0.57	u	0.67	f	1.24	6.44521	0.0821918	0.849315
																																		Group 9
																							Group 3											#	p (m)	L d (m)	L T	R d (m)	R T	raw tl	p (scaled)	s (scaled)	tl (scaled)
																							#	p (m)	L d (m)	L T	R d (m)	R T	raw tl	p (scaled)	s (scaled)	tl (scaled)										0
																															0			1	0.736704	0.18	r	0.25	r	0.43	0.504592	0.504592	0.294521
																							1	0.41	0.11	r	0.35	f	0.46	0.280822	0.280822	0.315068		2	1.01234	0.3	r	0.27	r	0.57	0.69338	0.188789	0.390411
																							2	0.77	0.54	r	0.18	f	0.72	0.527397	0.246575	0.493151		3	1.18146	0.3	r	0.25	r	0.55	0.809222	0.115841	0.376712
																							3	1.01	0.57	f	0.89	u	1.46	0.691781	0.164384	1		4	1.28547	0.29	r	0.33	r	0.62	0.88046	0.0712375	0.424658
																							4	1.22	0.59	u	0.36	f	0.95	0.835616	0.143836	0.650685		5	3.29964	0.61	r	0.84	r	1.45	2.26003	1.37957	0.993151
																							5	1.28	0.12	f	1.47	u	1.59	0.876712	0.0410959	1.08904		6	4.17757	0.45	r	0.42	r	0.87	2.86135	0.601323	0.59589
																							6	1.96	1.32	f	1.36	f	2.68	1.34247	0.465753	1.83562		7	4.7718	0.78	r	1.08	r	1.86	3.26836	0.407008	1.27397
																							7	2.83	1.41	u	1.37	f	2.78	1.93836	0.59589	1.90411		8	5.05332	0.84	r	0.23	r	1.07	3.46118	0.19282	0.732877
																							8	2.87	0.2	f	0.06	f	0.26	1.96575	0.0273973	0.178082		9	6.32744	0.9	r	0.44	f	1.34	4.33387	0.87269	0.917808
																							9	3.33	0.42	f	0.36	f	0.78	2.28082	0.315068	0.534247		10	6.42168	0.5	r	1.36	r	1.86	4.39841	0.0645471	1.27397
																							10	3.58	0.28	u	0.52	f	0.8	2.45205	0.171233	0.547945		11	7.85138	0.41	r	1.21	r	1.62	5.37766	0.979242	1.10959
																							11	4.18	0.31	f	0.27	r	0.58	2.86301	0.410959	0.39726		12	8.00375	1.24	r	1.28	r	2.52	5.48202	0.104362	1.72603
																							12	4.23	0.8	r	1.57	f	2.37	2.89726	0.0342466	1.62329		13	8.54234	0.23	r	0.09	r	0.32	5.85092	0.368902	0.219178
																							13	4.81	0.07	f	0.26	r	0.33	3.29452	0.39726	0.226027		14	8.73501	0.4	r	1.14	r	1.54	5.98288	0.131961	1.05479
																							14	4.83	1.77	r	0.15	f	1.92	3.30822	0.0136986	1.31507		15	9.40652	0.47	r	0.3	r	0.77	6.44282	0.459939	0.527397
																							15	4.92	0.21	f	1.44	f	1.65	3.36986	0.0616438	1.13014
																							16	5.05	0.49	r	0.2	r	0.69	3.4589	0.0890411	0.472603		Group 10
																							17	6.34	0.46	u	0.25	f	0.71	4.34247	0.883562	0.486301		#	p (m)	L d (m)	L T	R d (m)	R T	raw tl	p (scaled)	s (scaled)	tl (scaled)
																							18	6.42	1.32	u	1.36	r	2.68	4.39726	0.0547945	1.83562										0
																							19	6.72	0.07	u	0.41	f	0.48	4.60274	0.205479	0.328767		1	0.354666	1.01	r	1.06	u	2.07	0.242922	0.242922	1.41781
																							20	7.85	0.58	f	2.1		2.68	5.37671	0.773973	1.83562		2	0.768242	0.58	f	0.27	r	0.85	0.526193	0.283271	0.582192
																							21	8.02	2.02	u	0.48	u	2.5	5.49315	0.116438	1.71233		3	0.995417	0.35	r	0.83	r	1.18	0.681793	0.1556	0.808219
																							22	8.09	0.12	f	0.3	f	0.42	5.5411	0.0479452	0.287671		4	1.21031	0.81	r	1.33	r	2.14	0.828979	0.147186	1.46575
																							23	8.13	0.16	r	0.07	f	0.23	5.56849	0.0273973	0.157534		5	1.30707	0.66	r	1.49	u	2.15	0.895253	0.0662741	1.4726
																							24	8.28	0.17	r	0.06	r	0.23	5.67123	0.10274	0.157534		6	1.95317	0.3	r	1.29	r	1.59	1.33779	0.442534	1.08904
																							25	8.54	0.45	f	0.14	r	0.59	5.84932	0.178082	0.40411		7	2.88936	1.64	r	1.43	r	3.07	1.97902	0.641228	2.10274
																							26	8.72	0.54	u	0.17	r	0.71	5.9726	0.123288	0.486301		8	3.35046	0.35	r	1.15	r	1.5	2.29483	0.315818	1.0274
																							27	8.79	0.19	r	1.15	f	1.34	6.02055	0.0479452	0.917808		9	3.54316	0.36	r	1.11	r	1.47	2.42682	0.13199	1.00685
																							28	8.98	0.61	f	0.52	u	1.13	6.15068	0.130137	0.773973		10	4.1991	1.1	r	1.22	r	2.32	2.87609	0.44927	1.58904
																							29	9.32	0.29	f	0.35	u	0.64	6.38356	0.232877	0.438356		11	4.80351	1.52	f	1.29	f	2.81	3.29007	0.413979	1.92466
																							30	9.44	0.46	r	0.3	r	0.76	6.46575	0.0821918	0.520548		12	5.03681	1.77	r	0.27	r	2.04	3.44987	0.159794	1.39726
																							31	9.53	0.37	r	0.26	f	0.63	6.5274	0.0616438	0.431507		13	6.32145	1.08	r	0.75	f	1.83	4.32976	0.879893	1.25342
																																		14	6.44251	0.81	r	1.98	u	2.79	4.41268	0.0829218	1.91096
																							Group 4											15	7.37603	0.29	r	0.08	r	0.37	5.05208	0.639397	0.253425
																							#	p (m)	L d (m)	L T	R d (m)	R T	raw tl	p (scaled)	s (scaled)	tl (scaled)		16	7.64487	0.22	r	1.21	r	1.43	5.23621	0.184132	0.979452
																															0			17	7.851	1.68	r	1.85	r	3.53	5.3774	0.141187	2.41781
																							1	0.12	0.68	f	0.12	r	0.8	0.0186335	0.0186335	0.547945		18	7.99365	1.63	r	1.44	r	3.07	5.4751	0.0977051	2.10274
																							2	0.74	0.86	r	0.1	r	0.96	0.114907	0.0962733	0.657534		19	8.12437	0.2	r	0	r	0.2	5.56464	0.0895378	0.136986
																							3	1.02	0.77	r	0.11	r	0.88	0.158385	0.0434783	0.60274		20	8.33117	0.21	r	0	r	0.21	5.70628	0.141642	0.143836
																							4	1.19	1.28	u	0.14	r	1.42	0.184783	0.0263975	0.972603		21	8.54046	0.22	r	0	r	0.22	5.84963	0.143348	0.150685
																							5	1.29	1.48	u	0.16	r	1.64	0.200311	0.015528	1.12329		22	8.68444	0.37	r	1.25	r	1.62	5.94825	0.0986186	1.10959
																							6	2.83	1.22	f	0.3	f	1.52	0.439441	0.23913	1.0411		23	9.25586	0.8	r	0.2	f	1	6.33963	0.391381	0.684932
																							7	3.32	0.85	r	0.34	f	1.19	0.515528	0.076087	0.815068		24	9.37092	0.53	r	1.14	r	1.67	6.41844	0.0788092	1.14384
																							8	4.19	0.45	r	0.31	u	0.76	0.650621	0.135093	0.520548
																							9	4.8	1.58	f	0.65	f	2.23	0.745342	0.0947205	1.5274		Group 11
																							10	5.04	0.36	r	0.24	r	0.6	0.782609	0.0372671	0.410959		#	p (m)	L d (m)	L T	R d (m)	R T	raw tl	p (scaled)	s (scaled)	tl (scaled)
																							11	6.32	0.89	r	0.23	f	1.12	0.981366	0.198758	0.767123										0
																							12	6.4	0.47	r	0.26	u	0.73	0.993789	0.0124224	0.5		1	0.245959	0.75	r	1	U	1.75	0.168465	0.168465	1.19863
																							13	7.33	0.23	r	0.14	f	0.37	1.1382	0.14441	0.253425		2	0.371689	0.81	f	0.32	f	1.13	0.254581	0.0861161	0.773973
																							14	7.81	0.29	r	0.17	r	0.46	1.21273	0.0745342	0.315068		3	0.701641	0.73	f	0.27	f	1	0.480576	0.225995	0.684932
																							15	8.1	0.2	r	0	r	0.2	1.25776	0.0450311	0.136986		4	0.991324	0.65	r	0.69	r	1.34	0.678989	0.198413	0.917808
																							16	8.27	0.22	r	0	r	0.22	1.28416	0.0263975	0.150685		5	1.29428	0.88	r	0.59	r	1.47	0.886494	0.207505	1.00685
																							17	8.53	0.24	f	0	r	0.24	1.32453	0.0403727	0.164384		6	2.86682	1.4	f	1.42	f	2.82	1.96358	1.07708	1.93151
																							18	8.7	0.36	f	0.14	f	0.5	1.35093	0.0263975	0.342466		7	3.30404	0.55	r	0.74	r	1.29	2.26304	0.299463	0.883562
																							19	8.93	0.22	f	0.55	u	0.77	1.38665	0.0357143	0.527397		8	3.52651	0.56	f	0.61	f	1.17	2.41541	0.152374	0.80137
																							20	9.31	0.49	r	0.26	f	0.75	1.44565	0.0590062	0.513699		9	4.20653	0.66	f	1.07	f	1.73	2.88119	0.465771	1.18493
																							21	9.41	0.2	r	0.26	f	0.46	1.46118	0.015528	0.315068		10	4.78589	1.68	f	1.05	r	2.73	3.27801	0.39682	1.86986
																							22	9.52	0.18	r	0.19	f	0.37	1.47826	0.0170807	0.253425		11	5.04905	1.34	r	0.39	r	1.73	3.45825	0.180247	1.18493
																																		12	6.33825	0.68	f	1.07	r	1.75	4.34127	0.883015	1.19863
																							G5											13	6.45522	0.69	r	0.31	f	1	4.42138	0.0801162	0.684932
																							#	p (m)	L d (m)	L T	R d (m)	R T	raw tl	p (scaled)	s (scaled)	tl (scaled)		14	7.87745	1.64	f	1.2	f	2.84	5.39551	0.97413	1.94521
																															0			15	9.42991	0.47	r	0.34	r	0.81	6.45884	1.06333	0.554795
																							1	0.13	0.75	f	0.87	u	1.62	0.0201863	0.0201863	1.10959
																							2	0.39	0.81	f	0.35	f	1.16	0.060559	0.0403727	0.794521		Group 12
																							3	0.54	0.31	f	0.25	r	0.56	0.0838509	0.0232919	0.383562		#	p (m)	L d (m)	L T	R d (m)	R T	raw tl	p (scaled)	s (scaled)	tl (scaled)
																							4	0.8	0.51		0.32		0.83	0.124224	0.0403727	0.568493										0
																							5	1.03	0.3		0.56		0.86	0.159938	0.0357143	0.589041		1	0.387594	0.72	U	1.13	f	1.85	0.265475	0.265475	1.26712
																							6	1.26	0.84	u	1.32		2.16	0.195652	0.0357143	1.47945		2	0.78731	1.02	f	0.8	u	1.82	0.539253	0.273778	1.24658
																							7	1.31	1.44	u	1.48		2.92	0.203416	0.00776398	2		3	1.00164	0.36	r	0.46	r	0.82	0.686056	0.146803	0.561644
																							8	2.83	0.83		0.34		1.17	0.439441	0.236025	0.80137		4	1.20128	0.9	r	0.69	r	1.59	0.822796	0.13674	1.08904
																							9	3.32	2.16		0.52		2.68	0.515528	0.076087	1.83562		5	1.28697	0.25	r	1.4	u	1.65	0.881485	0.0586886	1.13014
																							10	3.58	0		1.21		1.21	0.555901	0.0403727	0.828767		6	1.95173	0.06	r	1.78	u	1.84	1.3368	0.455314	1.26027
																							11	4.19	1.6		1.25		2.85	0.650621	0.0947205	1.95205		7	3.25164	0.43	r	1.45	r	1.88	2.22715	0.890352	1.28767
																							12	4.85	1.65		1.43		3.08	0.753106	0.102484	2.10959		8	3.58055	0.13	r	0.49	r	0.62	2.45243	0.225283	0.424658
																							13	5.04	1.52	f	0.21		1.73	0.782609	0.0295031	1.18493		9	4.17212	0.61	r	1.26	r	1.87	2.85761	0.40518	1.28082
																							14	6.33	0.75		1.94		2.69	0.982919	0.200311	1.84247		10	4.7935	1.76	r	1.18	f	2.94	3.28322	0.425607	2.0137
																							15	6.41	0.41		0.82		1.23	0.995342	0.0124224	0.842466		11	5.05327	1.23	r	0.36	r	1.59	3.46115	0.177925	1.08904
																							16	7.51	0		2.09		2.09	1.16615	0.170807	1.43151		12	6.35218	0.81	r	0.58	f	1.39	4.35081	0.889662	0.952055
																							17	7.66	0		2.08		2.08	1.18944	0.0232919	1.42466		13	6.42258	1.09	r	0.98	r	2.07	4.39903	0.0482189	1.41781
																							18	7.84	1.69		2.09		3.78	1.21739	0.0279503	2.58904		14	6.46556	0.65	r	0.37	r	1.02	4.42846	0.0294371	0.69863
																							19	7.95	0.16		0.07		0.23	1.23447	0.0170807	0.157534		15	6.99052	0.16	r	0.41	f	0.57	4.78803	0.359564	0.390411
																							20	8.05	1.88		1.33		3.21	1.25	0.015528	2.19863		16	7.33963	0.56	f	1.22	r	1.78	5.02714	0.239114	1.21918
																							21	8.13	0.17		0.72	f	0.89	1.26242	0.0124224	0.609589		17	7.6487	0.29	r	1.26	r	1.55	5.23883	0.211693	1.06164
																							22	8.3	0.17		0		0.17	1.28882	0.0263975	0.116438		18	7.80884	1.35	r	0.25	f	1.6	5.34852	0.109688	1.09589
																							23	8.54	0.2		0		0.2	1.32609	0.0372671	0.136986		19	7.8585	0.78	f	1.04	r	1.82	5.38254	0.0340126	1.24658
																							24	8.71	0.37		1.5		1.87	1.35248	0.0263975	1.28082		20	8.01765	2.28	u	1.25	r	3.53	5.49154	0.109006	2.41781
																							25	9.34	0.49	f	0.63		1.12	1.45031	0.0978261	0.767123		21	8.1409	0.3	r	0.15	r	0.45	5.57596	0.0844185	0.308219
																							26	9.42	0.75		0.51		1.26	1.46273	0.0124224	0.863014		22	8.31027	0.39	r	0.07	r	0.46	5.69196	0.116005	0.315068
																							27	9.54	0.77		0.61		1.38	1.48137	0.0186335	0.945205		23	8.57003	0.23	r	0.08	r	0.31	5.86988	0.177918	0.212329
																																		24	8.72614	0.54	r	0.59	r	1.13	5.97681	0.106925	0.773973
																							G6											25	9.09145	0.66	r	0.08	f	0.74	6.22702	0.250214	0.506849
																							#	p (m)	L d (m)	L T	R d (m)	R T	raw tl	p (scaled)	s (scaled)	tl (scaled)		26	9.12834	0.24	r	0.27	r	0.51	6.25229	0.0252686	0.349315
																															0			27	9.37749	0.56	r	0.68	r	1.24	6.42294	0.170647	0.849315
																							1	0.37	1.14	F	0.49	r	1.63	0.0574534	0.0574534	1.11644		28	9.5303	0.37	r	0.57	f	0.94	6.5276	0.104667	0.643836
																							2	1.01	0.67	f	0.59	r	1.26	0.156832	0.0993789	0.863014
																							3	1.21	1.19	r	1.16	r	2.35	0.187888	0.0310559	1.60959
																							4	1.29	0.99	r	0.36	f	1.35	0.200311	0.0124224	0.924658
																							5	2.82	1.58	r	0.14	r	1.72	0.437888	0.237578	1.17808
																							6	3.34	0.21	r	0.94	r	1.15	0.518634	0.0807453	0.787671
																							7	3.6	0.18	r	0.65	f	0.83	0.559006	0.0403727	0.568493
																							8	4.19	0.17	r	1.37	r	1.54	0.650621	0.0916149	1.05479
																							9	4.79	0.58	r	1.15	r	1.73	0.743789	0.0931677	1.18493
																							10	5.06	0.69	r	0.74	f	1.43	0.785714	0.0419255	0.979452
																							11	6.31	0.68	r	0.33	f	1.01	0.979814	0.194099	0.691781
																							12	6.41	0.33	r	0.75	r	1.08	0.995342	0.015528	0.739726
																							13	7.38	0.48	r	0.66	f	1.14	1.14596	0.150621	0.780822
																							14	7.66	0.25	r	1.02	r	1.27	1.18944	0.0434783	0.869863
																							15	7.84	0.5	r	0.61	r	1.11	1.21739	0.0279503	0.760274
																							16	7.94	1.1	r	0.21	f	1.31	1.23292	0.015528	0.89726
																							17	8.13	0.19	r	1.06	r	1.25	1.26242	0.0295031	0.856164
																							18	8.55	0.51	f	0.18	r	0.69	1.32764	0.0652174	0.472603
																							19	8.75	0.72	r	1.23	r	1.95	1.3587	0.0310559	1.33562
																							20	9.3	0.32	r	1.24	r	1.56	1.4441	0.0854037	1.06849

## Sheet: L6
	Summery of Line 6																						B: Participant data											Participant 11											Participant 20
	P	N	T (sec)	F	R	U	Tl	Tl median	tl min	tl max	tl range	tl CoV	S	S median	s min	s max	s range	s CoV	f/m	Pf	censored													#	p (Arc)	L d (Arc)	L T	R d (Arc)	R T	tl (Arc)	p (m)	s (m)	tl (m)		#	p (Arc)	L d (Arc)	L T	R d (Arc)
	1	10	314	8	5	7	0.288743	0.295082	0.052459	0.60765	0.555191	0.633333	0.11235	0.0612022	0	0.360656	0.360656	2.89286	6.89655	0.4	0.35		Participant 1																			0
	2	14	408	11	15	2	0.165886	0.160109	0.0459016	0.250273	0.204372	0.619454	0.0805621	0.0595628	0.00874317	0.272131	0.263388	0.926606	9.65517	0.392857	0.0714286		#	p (Arc)	L d (Arc)	L T	R d (Arc)	R T	tl (Arc)	p (m)	s (m)	tl (m)		1	1.45	0.78	R	0.96	F	1.74	0.15847	0.15847	0.190164		1	1.49	0.92	f	0.93
	3	23	137	33	9	4	0.160135	0.123679	0.0153581	0.48424	0.468882	0.883638	0.0492819	0.0155958	0.00407879	0.2943	0.290221	2.45301	15.8621	0.717391	0.0869565										0			2	1.88	0.28	F	0.57	U	0.85	0.205464	0.0469945	0.0928962		2	2.02	1.06	r	0.55
	4	17	220	15	17	2	0.148248	0.114754	0.0273224	0.457923	0.430601	0.933333	0.0666024	0.0415301	0.00546448	0.330055	0.32459	1.71053	11.7241	0.441176	0.0588235		1	1.87	0.21	r	2.17	u	2.38	0.204372	0.204372	0.260109		3	1.99	0.98	R	0.5	F	1.48	0.217486	0.0120219	0.161749		3	5.02	0.62	r	0.77
	5	11	520	4	12	6	0.259811	0.225137	0.0918033	0.48306	0.391257	0.878641	0.102832	0.0808743	0	0.328962	0.328962	1.62162	7.58621	0.181818	0.272727		2	1.87	0.48	f	0	f	0.48	0.204372	0	0.052459		4	5.02	0.71	R	0.85	F	1.56	0.548634	0.331148	0.170492		4	5.3	2.41	u	2.04
	6	22	326	12	26	6	0.159513	0.129508	0.0153005	0.487432	0.472131	1.11814	0.0511177	0.0196721	0	0.298361	0.298361	2.43056	15.1724	0.272727	0.136364		3	1.99	2.76	U	0.51	f	3.27	0.217486	0.0131148	0.357377		5	5.3	0.75	F	0.76	F	1.51	0.579235	0.0306011	0.165027		5	5.85	0	r	2.02
	7	13	300	7	14	5	0.225137	0.212022	0.0896175	0.487432	0.397814	0.907216	0.086591	0.063388	0	0.333333	0.333333	1.08621	8.96552	0.269231	0.192308		4	5.29	2.39	U	2.03	U	4.42	0.578142	0.360656	0.48306		6	5.31	0.39	R	0.06	F	0.45	0.580328	0.0010929	0.0491803		6	6.15	0	r	2.05
	8	14	296	5	16	7	0.212334	0.188525	0.100546	0.466667	0.36612	0.472464	0.080484	0.0431694	0.00874317	0.33224	0.323497	1.46835	9.65517	0.178571	0.25		5	7.53	3.79	u	1.77	f	5.56	0.822951	0.244809	0.60765		7	5.76	0.25	R	0.91	R	1.16	0.629508	0.0491803	0.126776		7	7.53	3.36	f	1.95
	9	12	240	1	14	9	0.243625	0.227322	0.0994536	0.485246	0.385792	0.558894	0.0940801	0.0530055	0.00874317	0.330055	0.321311	1.60825	8.27586	0.0416667	0.375		6	7.92	1.59	r	0.36	f	1.95	0.865574	0.042623	0.213115		8	5.84	0.22	R	2.01	U	2.23	0.638251	0.00874317	0.243716		8	7.95	2.3	u	1.8
	10	17	-	11	13	10	0.241144	0.234973	0.0699454	0.48306	0.413115	0.353488	0.0665381	0.031694	0	0.331148	0.331148	2.34483	11.7241	0.323529	0.294118		7	8.65	0.96	r	2.06	u	3.02	0.945355	0.0797814	0.330055		9	7.92	1.66	R	0.32	R	1.98	0.865574	0.227322	0.216393		9	8.63	2.31	u	2.05
	11	19	203	16	19	3	0.160656	0.161749	0.0284153	0.419672	0.391257	0.709459	0.059419	0.0185792	0.0010929	0.331148	0.330055	2.52941	13.1034	0.421053	0.0789474		8	8.77	0.95	r	0.53	f	1.48	0.95847	0.0131148	0.161749		10	7.98	0.1	F	1.88	R	1.98	0.872131	0.00655738	0.216393		10	8.79	0.75	f	2.05
	12	22	600	15	20	9	0.195777	0.17541	0.0371585	0.484153	0.446995	0.777259	4.29218	1.5555	0.2745	26.535	26.2605	2.19118	15.1724	0.340909	0.204545		9	10.14	0.32	f	0.22	f	0.54	1.1082	0.149727	0.0590164		11	8.15	0.3	R	0.15	R	0.45	0.89071	0.0185792	0.0491803		11	8.93	0	r	2.09
	13	23	755	12	26	8	0.20575	0.180328	0.0448087	0.518033	0.473224	0.757576	0.0491328	0.0284153	0.00546448	0.28306	0.277596	1.36538	15.8621	0.26087	0.173913		10	10.28	1.23	r	2.09	u	3.32	1.1235	0.0153005	0.362842		12	8.66	1.01	F	0.86	F	1.87	0.946448	0.0557377	0.204372		12	9.14	0.84	f	0.65
	14	25	265	10	33	7	0.180608	0.161749	0.0437158	0.489617	0.445902	1.00676	0.0477377	0.0262295	0	0.289617	0.289617	1.5	17.2414	0.2	0.14													13	8.8	1.34	R	1.45	r	2.79	0.961749	0.0153005	0.304918		13	9.61	0.65	r	1.78
	15	22	364	18	17	9	0.204421	0.191257	0.0469945	0.486339	0.439344	0.528571	0.0545455	0.0240437	0.00546448	0.31694	0.311475	1.78409	15.1724	0.409091	0.204545		Participant 2											14	8.87	0.2	R	0.7	F	0.9	0.969399	0.00765027	0.0983607		14	10.27	2.38	u	2.23
	16	19	554	11	21	6	0.20115	0.187978	0.0688525	0.487432	0.418579	0.712209	0.0592465	0.031694	0	0.327869	0.327869	1.2931	13.1034	0.289474	0.157895		#	p (Arc)	L d (Arc)	L T	R d (Arc)	R T	tl (Arc)	p (m)	s (m)	tl (m)		15	9.63	0.62	R	0.28	R	0.9	1.05246	0.0830601	0.0983607		15	10.27	0	f	0.96
	17	22	552	12	25	7	0.249578	0.234426	0.0994536	0.66776	0.568306	0.385781	0.0513661	0.0251366	0	0.296175	0.296175	1.38043	15.1724	0.272727	0.159091										0			16	10.13	0.35	F	0.42	F	0.77	1.1071	0.0546448	0.084153
	18	18	330	6	21	9	0.25677	0.244262	0.110383	0.531148	0.420765	0.493289	0.0630237	0.0398907	0.00983607	0.293989	0.284153	1.20548	12.4138	0.166667	0.25		1	1.06	1.1	f	0.23	r	1.33	0.115847	0.115847	0.145355		17	10.16	0.09	F	0.17	F	0.26	1.11038	0.00327869	0.0284153		Participant 21
	19	14	460	13	13	2	0.267135	0.248634	0.0775956	0.508197	0.430601	0.923077	0.0808743	0.0371585	0	0.33224	0.33224	2.09559	9.65517	0.464286	0.0714286		2	1.48	1.18	f	0.98	r	2.16	0.161749	0.0459016	0.236066		18	10.26	1.64	R	2.2	U	3.84	1.12131	0.010929	0.419672		#	p (Arc)	L d (Arc)	L T	R d (Arc)
	20	15	558	10	9	11	0.302514	0.228415	0.104918	0.580328	0.47541	1.19617	0.074827	0.0513661	0	0.327869	0.327869	0.904255	10.3448	0.333333	0.366667		3	1.98	1.45	f	0.48	r	1.93	0.216393	0.0546448	0.210929		19	10.33	0.27	F	0.94	R	1.21	1.12896	0.00765027	0.13224
	21	24	261	17	21	10	0.214526	0.210929	0.0469945	0.570492	0.523497	0.898964	0.0601093	0.0371585	0	0.289617	0.289617	1.30882	16.5517	0.354167	0.208333		4	2.53	0.19	r	0.23	r	0.42	0.276503	0.0601093	0.0459016													1	1.37	0.93	f	0.88
	22	16	360	9	18	5	0.232855	0.262295	0.0655738	0.488525	0.422951	0.698958	0.070765	0.0295082	0	0.295082	0.295082	1.5463	11.0345	0.28125	0.15625		5	5.02	0.64	r	0.75	f	1.39	0.548634	0.272131	0.151913		Participant 12											2	1.42	0.09	f	0.72
	23	-	480	-	-	-	-		-	-	-		-		-	-	-		-	-	-		6	5.84	0.23	r	2.01	u	2.24	0.638251	0.0896175	0.244809		#	p (Arc)	L d (Arc)	L T	R d (Arc)	R T	tl (Arc)	p (m)	s (m)	tl (m)		3	1.9	0.44	r	0.88
	24	11	300	2	6	14	0.397417	0.401093	0.22623	0.71694	0.49071	0.446866	0.102335	0.0775956	0.0295082	0.277596	0.248087	0.71831	7.58621	0.0909091	0.636364		7	6.11	0.19	r	2.03	u	2.22	0.66776	0.0295082	0.242623										0			4	1.9	0	f	0.87
	25	24	360	18	16	14	0.202869	0.191803	0.0338798	0.612022	0.578142	0.839031	0.0470401	0.0229508	0	0.30929	0.30929	1.4881	16.5517	0.375	0.291667		8	7.92	1.53	r	0.76	f	2.29	0.865574	0.197814	0.250273		1	1.48	2.48	U	1.1	R	3.58	13.542	13.542	0.391257		5	2.03	2.79	u	0.57
	26	21	381	10	19	13	0.232266	0.229508	0.0896175	0.486339	0.396721	0.590476	0.0538121	0.020765	0	0.31694	0.31694	2.21053	14.4828	0.238095	0.309524		9	8	0.16	r	1.21	r	1.37	0.874317	0.00874317	0.149727		2	1.86	0.52	F	0.4	F	0.92	17.019	3.477	0.100546		6	2.37	0.76	f	1.45
	27	12	188	14	5	5	0.295719	0.299454	0.143169	0.551913	0.408743	0.470803	0.0945355	0.0491803	0.0120219	0.286339	0.274317	1.6	8.27586	0.583333	0.208333		10	8.64	0.87	f	0.67	f	1.54	0.944262	0.0699454	0.168306		3	2	0.84	R	0.5	F	1.34	18.3	1.281	0.146448		7	5.02	0.63	r	0.78
	28	9	111	6	8	4	0.313418	0.342077	0.0830601	0.523497	0.440437	0.71246	0.124347	0.0677596	0	0.578142	0.578142	0.967742	6.2069	0.333333	0.222222		11	8.82	1.04	f	0.69	r	1.73	0.963934	0.0196721	0.189071		4	2.12	0.82	F	0.57	F	1.39	19.398	1.098	0.151913		8	5.27	2.41	u	2.04
	29	23	1440	11	30	5	0.178095	0.162842	0.0251366	0.488525	0.463388	0.959732	0.0487052	0.0273224	0	0.291803	0.291803	1.26	15.8621	0.23913	0.108696		12	9.61	0.63	r	0.27	r	0.9	1.05027	0.0863388	0.0983607		5	5.02	0.64	R	0.88	F	1.52	45.933	26.535	0.16612		9	5.27	0	f	0.82
																							13	10.15	0.33	f	0.25	f	0.58	1.10929	0.0590164	0.063388		6	5.28	2.38	U	2.05	U	4.43	48.312	2.379	0.484153		10	5.82	0.13	r	2.02
	Mean	17.5714	402.964	11.3214	16.7143	7.10714	0.228432	0.21519	0.0708451	0.510854	0.440009	0.73093	0.222302	0.0942839	0.013345	1.25678	1.24344	1.63898	12.1182	0.316878	0.215577		14	10.32	0.33	f	0.82	r	1.15	1.12787	0.0185792	0.125683		7	5.36	0.26	F	0.7	F	0.96	49.044	0.732	0.104918		11	6.16	0	r	2.05
	Median	17.5	372.5	11	16.5	7	0.232266	0.228415	0.0672131	0.487978	0.434973	0.712335	0.0665702	0.0371585	0	0.31694	0.314208	1.52315	12.069	0.306502	0.204545													8	5.74	0.29	R	0.76	R	1.05	52.521	3.477	0.114754		12	7.53	3.45	f	1.77
	min	9	111	1	5	2	0.148248	0.114754	0.0153005	0.250273	0.204372	0.353488	0.0470401	0.0155958	0	0.272131	0.248087	0.71831	6.2069	0.0416667	0.0588235		Participant 3											9	5.84	0.17	R	2.01	U	2.18	53.436	0.915	0.238251		13	7.95	2.29	u	0.4
	max	25	1440	33	33	14	0.397417	0.401093	0.22623	0.71694	0.578142	1.19617	4.29218	1.5555	0.2745	26.535	26.2605	2.89286	17.2414	0.717391	0.636364		#	p (Arc)	L d (Arc)	L T	R d (Arc)	R T	tl (Arc)	p (m)	s (m)	tl (m)		10	6.02	0.14	U	2.06	U	2.2	55.083	1.647	0.240437		14	8.68	2.27	u	1.02
	Range	16	1329	32	28	12	0.249169	0.286339	0.210929	0.466667	0.37377	0.842684	4.24514	1.5399	0.2745	26.2629	26.0124	2.17455	11.0345	0.675725	0.57754										0			11	7.55	1.15	R	1.33	R	2.48	69.0825	13.9995	0.271038		15	8.82	0.76	r	2.11
	CoV	0.471429	0.660403	0.590909	0.5	0.571429	0.276692	0.26555	0.768293	0.106809	0.152638	0.49094	0.529706	0.772059	#DIV/0!	0.118966	0.124647	0.547982	0.471429	0.508223	0.676481		1	1.45545	1.07947	f	0.455131	f	1.5346	0.159066	0.159066	0.167716		12	7.94	1.61	R	0.63	F	2.24	72.651	3.5685	0.244809		16	9.08	0.67	f	1.89
																							2	1.8748	0.489635	r	1.20993	f	1.69956	0.204897	0.0458311	0.185745		13	7.99	0.04	R	2.03	U	2.07	73.1085	0.4575	0.22623		17	9.64	0.85	r	0.36
																							3	2.0069	0.471355	f	0.444159	f	0.915514	0.219333	0.0144366	0.100056		14	8.08	0.33	R	0.11	R	0.44	73.932	0.8235	0.0480874		18	10.29	0.15	f	2.23
																							4	2.12488	0.366639	f	0.511813	f	0.878452	0.232228	0.0128942	0.0960057		15	8.15	0.23	R	0.11	R	0.34	74.5725	0.6405	0.0371585		19	10.35	1.66	r	0.65
																							5	2.34486	0.648131	f	0.992181	f	1.64031	0.256269	0.0240412	0.179269		16	8.64	0.9	R	2.06	U	2.96	79.056	4.4835	0.323497		20	12.06	0.15	r	0.84
																							6	5.0377	0.667	r	0.806607	f	1.47361	0.550568	0.2943	0.16105		17	8.79	0.95	R	0.65	F	1.6	80.4285	1.3725	0.174863		21	12.15	0.36	r	0.07
																							7	5.1804	0.563533	f	2.0909	f	2.65443	0.566164	0.0155958	0.290102		18	8.84	0.09	F	1.52	F	1.61	80.886	0.4575	0.175956		22	12.71	0.49	r	0.26
																							8	5.3164	2.38892	u	2.04188	u	4.4308	0.581027	0.0148631	0.48424		19	9.62	0.66	R	0.28	R	0.94	88.023	7.137	0.102732		23	12.98	0.23	r	0.29
																							9	5.71201	0.370128	r	0.357474	f	0.727602	0.624263	0.0432358	0.0795193		20	10.13	0.45	F	0.3	F	0.75	92.6895	4.6665	0.0819672		24	13.2	0.48	u	0.15
																							10	5.81963	0.247427	r	0.42194	f	0.669367	0.636025	0.0117624	0.0731549		21	10.29	0.04	F	1.94	U	1.98	94.1535	1.464	0.216393
																							11	6.09443	0.158894	r	2.04093	u	2.19983	0.666058	0.0300327	0.240418		22	10.32	1.22	R	1.21	R	2.43	94.428	0.2745	0.265574		Participant 22
																							12	7.51861	3.64375	f	0.253649	f	3.8974	0.821706	0.155648	0.425946													#	p (Arc)	L d (Arc)	L T	R d (Arc)
																							13	7.89868	1.55452	r	0.331766	f	1.88628	0.863244	0.0415375	0.206151		Participant 13
																							14	7.94503	0.094317	f	0.381677	f	0.475994	0.868309	0.00506523	0.0520212		#	p (Arc)	L d (Arc)	L T	R d (Arc)	R T	tl (Arc)	p (m)	s (m)	tl (m)		1	1.44	0.46	r	0.39
																							15	8.63524	0.655602	f	0.476059	f	1.13166	0.943742	0.0754331	0.123679										0			2	1.85	0.38	r	2.13
																							16	8.76782	0.660457	f	0.49029	f	1.15075	0.958232	0.0144894	0.125765		1	1.5	1.01	f	0.64	r	1.65	0.163934	0.163934	0.180328		3	1.99	1.08	r	0.51
																							17	8.82582	0.15496	f	0.703326	f	0.858286	0.96457	0.00633876	0.0938017		2	1.93	0.44	r	0.23	r	0.67	0.210929	0.0469945	0.073224		4	2.09	0.42	r	0.18
																							18	8.86314	0.068156	f	0.072371	f	0.140527	0.968649	0.00407879	0.0153581		3	1.99	2.68	u	2.06	u	4.74	0.217486	0.00655738	0.518033		5	2.33	1.72	r	0.66
																							19	9.62006	0.706499	r	0.276968	r	0.983467	1.05137	0.0827237	0.107483		4	2.26	0.14	r	0.37	f	0.51	0.246995	0.0295082	0.0557377		6	5.03	0.64	r	0.75
																							20	10.1172	0.217659	f	0.184292	f	0.401951	1.10571	0.0543368	0.0439291		5	2.42	0.39	r	0.32	f	0.71	0.264481	0.0174863	0.0775956		7	5.22	2.42	u	2.05
																							21	10.2261	0.220949	f	0.28591	f	0.506859	1.1176	0.0118925	0.0553944		6	5.01	0.33	r	1.06	f	1.39	0.547541	0.28306	0.151913		8	5.22	0	f	0.84
																							22	10.3132	0.212029	f	2.25183	u	2.46386	1.12712	0.00952073	0.269274		7	5.32	2.4	u	2.04	u	4.44	0.581421	0.0338798	0.485246		9	7.91	1.59	r	1.65
																							23	10.3714	0.129707	f	0.849646	r	0.979353	1.13348	0.00636002	0.107033		8	5.75	0.45	r	0.97	r	1.42	0.628415	0.0469945	0.155191		10	8.64	0.76	f	1.86
																																		9	5.83	0.27	r	2.02	u	2.29	0.637158	0.00874317	0.250273		11	8.82	0.37	r	2.09
																							Participant 4											10	6.09	0.12	r	2.05	u	2.17	0.665574	0.0284153	0.237158		12	9.12	2.08	r	1.55
																							#	p (Arc)	L d (Arc)	L T	R d (Arc)	R T	tl (Arc)	p (m)	s (m)	tl (m)		11	7.54	3.21	r	1.05	f	4.26	0.824044	0.15847	0.465574		13	9.63	0.63	r	1.79
																															0			12	7.93	1.83	r	0.78	f	2.61	0.866667	0.042623	0.285246		14	10.14	0.34	f	0.52
																							1	1.45	0.54	r	0.63	r	1.17	0.15847	0.15847	0.127869		13	8.03	0.06	r	1.85	u	1.91	0.877596	0.010929	0.208743		15	10.29	0.88	r	2.22
																							2	2	0.45	r	0.47	r	0.92	0.218579	0.0601093	0.100546		14	8.08	0.18	r	0.64	r	0.82	0.88306	0.00546448	0.0896175		16	10.36	0.13	f	1
																							3	5.02	0.64	r	0.82	f	1.46	0.548634	0.330055	0.159563		15	8.15	0.28	r	0.13	r	0.41	0.89071	0.00765027	0.0448087
																							4	5.27	1.9	f	0.36	f	2.26	0.575956	0.0273224	0.246995		16	8.58	0.1	r	1.27	r	1.37	0.937705	0.0469945	0.149727		Participant 24
																							5	5.32	0.41	r	2.02	u	2.43	0.581421	0.00546448	0.265574		17	8.65	1.6	r	0.47	f	2.07	0.945355	0.00765027	0.22623		#	p (Arc)	L d (Arc)	L T	R d (Arc)
																							6	6.1	0	r	2.04	u	2.04	0.666667	0.0852459	0.222951		18	8.77	0.99	f	0.71	r	1.7	0.95847	0.0131148	0.185792
																							7	7.54	3.5	f	0.69	f	4.19	0.824044	0.157377	0.457923		19	8.83	0.12	f	1.49	r	1.61	0.965027	0.00655738	0.175956		1	1.51	2.55	u	1.16
																							8	7.92	0.7	f	0.35	f	1.05	0.865574	0.0415301	0.114754		20	9.63	0.6	r	0.39	r	0.99	1.05246	0.0874317	0.108197		2	2.38	1.15	r	1.78
																							9	8	0	r	0.38	f	0.38	0.874317	0.00874317	0.0415301		21	10.16	0.47	f	0.56	f	1.03	1.11038	0.0579235	0.112568		3	4.92	0.56	r	2.05
																							10	8.14	0.25	r	0	r	0.25	0.889617	0.0153005	0.0273224		22	10.29	0.07	f	2.23	u	2.3	1.12459	0.0142077	0.251366		4	5.29	2.45	u	2.04
																							11	8.64	1.07	f	0.47	f	1.54	0.944262	0.0546448	0.168306		23	10.34	1.22	r	1.01	r	2.23	1.13005	0.00546448	0.243716		5	5.83	0.11	u	2
																							12	8.8	0.5	r	0.22	f	0.72	0.961749	0.0174863	0.0786885													6	6.1	0	u	2.07
																							13	8.85	0.24	r	1.46	r	1.7	0.967213	0.00546448	0.185792		Participant 14											7	7.4	3.69	u	2.87
																							14	9.63	0.62	r	0.36	r	0.98	1.05246	0.0852459	0.107104		#	p (Arc)	L d (Arc)	L T	R d (Arc)	R T	tl (Arc)	p (m)	s (m)	tl (m)		8	8.01	2.3	u	1.37
																							15	10.15	0.3	f	0.24	f	0.54	1.10929	0.0568306	0.0590164										0			9	8.72	2.29	u	2.03
																							16	10.28	0.33	f	0.24	f	0.57	1.1235	0.0142077	0.0622951		1	0.07	0.32	r	0.08	r	0.4	0.00765027	0.00765027	0.0437158		10	9.59	1.16	r	1.76
																							17	10.36	0	r	0.86	r	0.86	1.13224	0.00874317	0.0939891		2	1.23	0.41	r	0.74	r	1.15	0.134426	0.126776	0.125683		11	10.3	2.4	u	2.21
																																		3	1.46	0.64	r	0.3	r	0.94	0.159563	0.0251366	0.102732
																							Participant 5											4	1.47	1.87	f	0.91	r	2.78	0.160656	0.0010929	0.303825		Participant 25
																							#	p (Arc)	L d (Arc)	L T	R d (Arc)	R T	tl (Arc)	p (m)	s (m)	tl (m)		5	1.77	0.43	r	1.49	r	1.92	0.193443	0.0327869	0.209836		#	p (Arc)	L d (Arc)	L T	R d (Arc)
																															0			6	1.89	0.25	r	0.39	f	0.64	0.206557	0.0131148	0.0699454
																							1	2	1.6	r	0.46	r	2.06	0.218579	0.218579	0.225137		7	2	0.92	r	0.56	f	1.48	0.218579	0.0120219	0.161749		1	1.02	0.35	f	0
																							2	5.01	0.62	r	0.66	r	1.28	0.547541	0.328962	0.139891		8	2.13	0.23	r	0.21	r	0.44	0.232787	0.0142077	0.0480874		2	1.21	1.03	f	0.72
																							3	5.25	2.38	u	2.04	u	4.42	0.57377	0.0262295	0.48306		9	2.37	1.99	r	0.49	r	2.48	0.259016	0.0262295	0.271038		3	1.4	0.83	f	1.13
																							4	5.25	0	F	0.84	f	0.84	0.57377	0	0.0918033		10	5.02	0.6	r	0.88	f	1.48	0.548634	0.289617	0.161749		4	1.89	0.24	r	1.52
																							5	6.06	0	r	2.04	u	2.04	0.662295	0.0885246	0.222951		11	5.31	2.43	u	2.05	u	4.48	0.580328	0.031694	0.489617		5	2.03	0.77	r	0.52
																							6	7.89	2.29	u	1.89	r	4.18	0.862295	0.2	0.456831		12	5.91	0.13	r	2.02	u	2.15	0.645902	0.0655738	0.234973		6	2.21	0.39	r	0.56
																							7	8.63	1.59	f	2.06	u	3.65	0.943169	0.0808743	0.398907		13	7.54	0.7	r	0.71	f	1.41	0.824044	0.178142	0.154098		7	5.04	0.6	r	0.95
																							8	8.74	0	r	1.69	f	1.69	0.955191	0.0120219	0.184699		14	7.95	1.64	r	0.38	f	2.02	0.868852	0.0448087	0.220765		8	5.3	2.4	u	2.05
																							9	9.66	0.62	r	1.54	r	2.16	1.05574	0.100546	0.236066		15	8.01	0.02	r	1.46	r	1.48	0.87541	0.00655738	0.161749		9	5.7	0	u	2.03
																							10	10.29	0.7	r	2.24	u	2.94	1.12459	0.0688525	0.321311		16	8.16	0.37	r	0.09	r	0.46	0.891803	0.0163934	0.0502732		10	5.86	0	u	0.72
																							11	10.35	0	r	0.89	r	0.89	1.13115	0.00655738	0.0972678		17	8.64	2.28	u	2.06	u	4.34	0.944262	0.052459	0.474317		11	6.09	0	u	1.68
																																		18	8.8	0.53	r	0.93	r	1.46	0.961749	0.0174863	0.159563		12	6.55	0	u	0.31
																							Participant 6											19	8.84	0.06	f	0.6	r	0.66	0.96612	0.00437158	0.0721311		13	7.56	3.81	f	1.79
																							#	p (Arc)	L d (Arc)	L T	R d (Arc)	R T	tl (Arc)	p (m)	s (m)	tl (m)		20	9.17	0.46	r	0.054	r	0.514	1.00219	0.0360656	0.0561749		14	7.94	2.33	u	0.76
																															0			21	9.64	0.69	r	0.2	r	0.89	1.05355	0.0513661	0.0972678		15	8.02	0	u	1.77
																							1	1.47	0.94	F	0.96	F	1.9	0.160656	0.160656	0.20765		22	10.15	0.39	f	0.24	f	0.63	1.10929	0.0557377	0.0688525		16	8.47	0.08	r	0.5
																							2	1.9	0.14	R	0	F	0.14	0.20765	0.0469945	0.0153005		23	10.34	0	f	2.22	u	2.22	1.13005	0.020765	0.242623		17	8.65	0.72	f	2.06
																							3	1.9	0.24	F	0.42	U	0.66	0.20765	0	0.0721311		24	10.34	2.31	u	1.03	r	3.34	1.13005	0	0.365027		18	8.78	0.75	f	2.05
																							4	1.98	0.42	F	0.46	R	0.88	0.216393	0.00874317	0.0961749		25	10.92	0.41	r	1.14	r	1.55	1.19344	0.063388	0.169399		19	8.85	0.09	f	2.1
																							5	2.08	0.24	R	0.25	F	0.49	0.227322	0.010929	0.0535519													20	9.61	0.63	r	1.64
																							6	2.29	0.16	R	0.58	R	0.74	0.250273	0.0229508	0.0808743		Participant 15											21	10.11	0.09	f	0.51
																							7	5.02	0.66	R	0.85	F	1.51	0.548634	0.298361	0.165027		#	p (Arc)	L d (Arc)	L T	R d (Arc)	R T	tl (Arc)	p (m)	s (m)	tl (m)		22	10.16	0.4	f	2.25
																							8	5.29	2.42	U	2.04	U	4.46	0.578142	0.0295082	0.487432										0			23	10.33	0.42	f	0.67
																							9	5.81	0.17	R	2.03	U	2.2	0.634973	0.0568306	0.240437		1	1.48	0.85	f	0.95	f	1.8	0.161749	0.161749	0.196721		24	10.33	0	f	0.33
																							10	6.1	0.25	R	2.05	U	2.3	0.666667	0.031694	0.251366		2	1.86	0.41	r	1.87	u	2.28	0.203279	0.0415301	0.24918
																							11	7.89	1.07	R	0.36	R	1.43	0.862295	0.195628	0.156284		3	2	1.02	r	0.56	f	1.58	0.218579	0.0153005	0.172678		Participant 26
																							12	7.98	0.22	F	1.82	R	2.04	0.872131	0.00983607	0.222951		4	2.12	0.66	r	1.04	r	1.7	0.231694	0.0131148	0.185792		#	p (Arc)	L d (Arc)	L T	R d (Arc)
																							13	8.05	0.16	R	0.4	R	0.56	0.879781	0.00765027	0.0612022		5	5.02	0.26	f	1	f	1.26	0.548634	0.31694	0.137705
																							14	8.12	0.19	R	0.07	R	0.26	0.887432	0.00765027	0.0284153		6	5.28	0.62	r	0.74	f	1.36	0.577049	0.0284153	0.148634		1	1.24	1.47	r	1.15
																							15	8.63	0.94	r	2	R	2.94	0.943169	0.0557377	0.321311		7	5.36	2.41	u	2.04	u	4.45	0.585792	0.00874317	0.486339		2	1.91	0.37	r	0.45
																							16	8.71	0.04	R	0.41	F	0.45	0.951913	0.00874317	0.0491803		8	5.74	0.39	r	0.89	r	1.28	0.627322	0.0415301	0.139891		3	2	2.5	r	0.45
																							17	8.8	0.39	R	0.49	F	0.88	0.961749	0.00983607	0.0961749		9	5.84	0.19	r	2.02	u	2.21	0.638251	0.010929	0.24153		4	2.11	1.24	f	0
																							18	8.87	0.25	R	1.37	R	1.62	0.969399	0.00765027	0.177049		10	6.02	0.14	r	2.05	u	2.19	0.657923	0.0196721	0.239344		5	5.01	0.64	r	0.77
																							19	9.62	0.66	R	0.26	R	0.92	1.05137	0.0819672	0.100546		11	7.55	1.11	r	0.42	f	1.53	0.825137	0.167213	0.167213		6	5.18	2.44	u	0.71
																							20	10.14	1.19	R	0.26	F	1.45	1.1082	0.0568306	0.15847		12	7.94	1.6	r	0.38	f	1.98	0.86776	0.042623	0.216393		7	5.3	2.39	u	2.06
																							21	10.29	1.25	R	2.09	U	3.34	1.12459	0.0163934	0.365027		13	7.99	0	f	0.43	f	0.43	0.873224	0.00546448	0.0469945		8	5.71	0	u	0.86
																							22	10.29	0	F	0.94	R	0.94	1.12459	0	0.102732		14	8.07	0.54	r	0.08	r	0.62	0.881967	0.00874317	0.0677596		9	5.82	0.44	r	2.02
																																		15	8.15	2.28	u	2.05	u	4.33	0.89071	0.00874317	0.473224		10	6.08	0	u	2.05
																							Participant 7											16	8.64	0.58	f	2.09	u	2.67	0.944262	0.0535519	0.291803		11	7.54	1.31	f	1.34
																							#	p (Arc)	L d (Arc)	L T	R d (Arc)	R T	tl (Arc)	p (m)	s (m)	tl (m)		17	8.79	0.69	f	0.96	f	1.65	0.960656	0.0163934	0.180328		12	7.91	1.72	r	0.38
																															0			18	8.84	0.56	r	0.21	f	0.77	0.96612	0.00546448	0.084153		13	8.01	0	u	1.81
																							1	1.98	1.43	R	0.51	F	1.94	0.216393	0.216393	0.212022		19	9.63	0.63	r	1.73	f	2.36	1.05246	0.0863388	0.257923		14	8.13	1.01	r	0
																							2	5.03	0.63	R	0.85	F	1.48	0.549727	0.333333	0.161749		20	10.13	0.2	f	0.3	f	0.5	1.1071	0.0546448	0.0546448		15	8.64	1.28	r	1.99
																							3	5.24	2.42	u	2.04	u	4.46	0.572678	0.0229508	0.487432		21	10.29	1.03	r	0.94	r	1.97	1.12459	0.0174863	0.215301		16	8.79	0.81	f	1.79
																							4	5.24	0	F	0.82	F	0.82	0.572678	0	0.0896175		22	10.32	0	f	2.23	u	2.23	1.12787	0.0754098	0.243716		17	8.85	0	u	1.44
																							5	5.82	0.21	R	2.01	U	2.22	0.636066	0.063388	0.242623													18	9.62	0.66	r	0.27
																							6	6.07	0	R	2.05	U	2.05	0.663388	0.0273224	0.224044		Participant 16											19	10.15	1.3	r	0.29
																							7	7.94	1.64	R	1.56	R	3.2	0.86776	0.204372	0.349727		#	p (Arc)	L d (Arc)	L T	R d (Arc)	R T	tl (Arc)	p (m)	s (m)	tl (m)		20	10.34	2.08	r	0.87
																							8	8.01	0	R	1.06	R	1.06	0.87541	0.00765027	0.115847										0			21	10.34	0	f	2.27
																							9	8.64	1.04	R	1.87	R	2.91	0.944262	0.0688525	0.318033		1	1.48	2.58	u	0.05	r	2.63	0.161749	0.161749	0.287432
																							10	8.81	1.13	F	2.09	U	3.22	0.962842	0.0185792	0.351913		2	1.86	0.43	r	0.43	f	0.86	0.203279	0.0415301	0.0939891		Participant 27
																							11	9.61	0.65	R	0.36	R	1.01	1.05027	0.0874317	0.110383		3	2.01	1.08	f	0.5	f	1.58	0.219672	0.0163934	0.172678		#	p (Arc)	L d (Arc)	L T	R d (Arc)
																							12	10.22	0.64	R	0.62	F	1.26	1.11694	0.0666667	0.137705		4	5.01	0.61	r	0.76	f	1.37	0.547541	0.327869	0.149727
																							13	10.3	0.31	F	0.84	R	1.15	1.12568	0.00874317	0.125683		5	5.3	2.42	u	2.04	u	4.46	0.579235	0.031694	0.487432		1	1.97	2.67	u	0.5
																																		6	5.3	0	f	0.77	f	0.77	0.579235	0	0.084153		2	2.38	0.66	r	0.98
																							Participant 8											7	5.72	0.24	r	0.84	r	1.08	0.625137	0.0459016	0.118033		3	5	0.61	r	0.74
																							#	p (Arc)	L d (Arc)	L T	R d (Arc)	R T	tl (Arc)	p (m)	s (m)	tl (m)		8	5.84	0.2	r	2.03	u	2.23	0.638251	0.0131148	0.243716		4	5.26	2.45	u	2.04
																															0			9	7.53	1.06	r	2.67	r	3.73	0.822951	0.184699	0.40765		5	7.51	3.61	f	1.44
																							1	1.98	0.92	R	0.49	u	1.41	0.216393	0.216393	0.154098		10	7.92	1.65	r	0.79	f	2.44	0.865574	0.042623	0.266667		6	7.93	2.2	f	0.81
																							2	5.02	0.68	R	0.95	F	1.63	0.548634	0.33224	0.178142		11	8.04	0	r	1.72	r	1.72	0.878689	0.0131148	0.187978		7	8.63	2.28	u	0.49
																							3	5.29	2.4	U	0.86	F	3.26	0.578142	0.0295082	0.356284		12	8.65	1.08	r	1.04	r	2.12	0.945355	0.0666667	0.231694		8	8.82	0.66	f	0.65
																							4	5.84	0.23	U	2	U	2.23	0.638251	0.0601093	0.243716		13	8.79	1.17	r	0.61	f	1.78	0.960656	0.0153005	0.194536		9	9.13	0.98	f	0.86
																							5	6.07	0.17	U	2.04	U	2.21	0.663388	0.0251366	0.24153		14	8.88	0.1	r	2.11	u	2.21	0.970492	0.00983607	0.24153		10	9.61	0.7	f	1.38
																							6	7.93	1.57	R	0.77	F	2.34	0.866667	0.203279	0.255738		15	9.15	0	r	0.84	f	0.84	1	0.0295082	0.0918033		11	10.27	1.29	r	1.76
																							7	8.03	0	R	1.75	r	1.75	0.877596	0.010929	0.191257		16	9.65	0.65	r	0.28	r	0.93	1.05464	0.0546448	0.101639		12	10.38	0.61	f	2.1
																							8	8.13	0.82	R	0.1	R	0.92	0.888525	0.010929	0.100546		17	10.16	0	r	0.63	r	0.63	1.11038	0.0557377	0.0688525
																							9	8.65	2.27	U	2	R	4.27	0.945355	0.0568306	0.466667		18	10.3	0	f	2.23	u	2.23	1.12568	0.0153005	0.243716		Participant 28
																							10	8.79	0.39	R	1.44	R	1.83	0.960656	0.0153005	0.2		19	10.3	0.45	f	0.91	r	1.36	1.12568	0	0.148634		#	p (Arc)	L d (Arc)	L T	R d (Arc)
																							11	8.87	0	R	1.41	R	1.41	0.969399	0.00874317	0.154098
																							12	9.62	0.61	r	0.32	r	0.93	1.05137	0.0819672	0.101639		Participant 17											1	5.29	2.43	u	2.04
																							13	10.19	1.14	r	0.56	F	1.7	1.11366	0.0622951	0.185792		#	p (Arc)	L d (Arc)	L T	R d (Arc)	R T	tl (Arc)	p (m)	s (m)	tl (m)		2	7.51	3.34	f	1.45
																							14	10.31	0.45	F	0.86	R	1.31	1.12678	0.0131148	0.143169										0			3	7.93	1.58	r	1.62
																																		1	1.5	0.88	r	0.91	r	1.79	0.163934	0.163934	0.195628		4	8.64	1.06	f	2.07
																							Participant 9											2	1.86	0.39	r	1.07	f	1.46	0.203279	0.0393443	0.159563		5	8.83	2.28	u	1.82
																							#	p (Arc)	L d (Arc)	L T	R d (Arc)	R T	tl (Arc)	p (m)	s (m)	tl (m)		3	1.96	1.07	r	0.48	f	1.55	0.214208	0.010929	0.169399		6	8.83	0	f	1.87
																															0			4	2.12	0.67	f	1.18	r	1.85	0.231694	0.0174863	0.202186		7	9.62	0.69	r	0.43
																							1	1.99	0.91	R	0	U	0.91	0.217486	0.217486	0.0994536		5	2.35	0.96	r	0.94	f	1.9	0.256831	0.0251366	0.20765		8	10.24	1.79	r	0.58
																							2	5.01	0.6	R	0.82	F	1.42	0.547541	0.330055	0.155191		6	5.06	0.61	r	0.78	f	1.39	0.553005	0.296175	0.151913		9	10.24	0	f	0.76
																							3	5.34	2.41	U	2.03	U	4.44	0.583607	0.0360656	0.485246		7	5.29	2.45	u	2.03	u	4.48	0.578142	0.0251366	0.489617
																							4	5.79	0.05	R	2.02	U	2.07	0.632787	0.0491803	0.22623		8	5.68	0.22	r	0.96	f	1.18	0.620765	0.042623	0.128962		Participant 29
																							5	6.09	0.05	R	2.04	U	2.09	0.665574	0.0327869	0.228415		9	5.85	0.19	r	2.02	u	2.21	0.639344	0.0185792	0.24153		#	p (Arc)	L d (Arc)	L T	R d (Arc)
																							6	7.93	1.59	R	0.89	R	2.48	0.866667	0.201093	0.271038		10	6	0	r	2.08	r	2.08	0.655738	0.0163934	0.227322
																							7	8.64	2.29	U	2.06	U	4.35	0.944262	0.0775956	0.47541		11	7.53	3.44	f	2.67	u	6.11	0.822951	0.167213	0.66776		1	1.56	0	r	1.91
																							8	8.75	0.05	R	1.33	R	1.38	0.956284	0.0120219	0.15082		12	7.97	1.64	r	0.37	f	2.01	0.871038	0.0480874	0.219672		2	1.83	0	r	0.59
																							9	8.83	0.77	R	2.08	U	2.85	0.965027	0.00874317	0.311475		13	8	0.68	r	1.75	r	2.43	0.874317	0.00327869	0.265574		3	1.94	1.91	r	0.51
																							10	9.62	0.67	R	0.3	R	0.97	1.05137	0.0863388	0.106011		14	8.14	1.08	r	0	r	1.08	0.889617	0.0153005	0.118033		4	2.02	0.93	r	0
																							11	10.14	0.27	R	2.06	U	2.33	1.1082	0.0568306	0.254645		15	8.64	1.27	r	1.97	r	3.24	0.944262	0.0546448	0.354098		5	2.3	0.6	f	0.98
																							12	10.33	0.61	R	0.85	R	1.46	1.12896	0.020765	0.159563		16	8.8	0.8	f	1.64	r	2.44	0.961749	0.0174863	0.266667		6	4.97	0.59	r	0.87
																																		17	8.88	0.21	r	2.09	u	2.3	0.970492	0.00874317	0.251366		7	5.25	2.43	u	2.04
																							Participant 10											18	9.15	0.71	r	1.95	f	2.66	1	0.0295082	0.29071		8	5.25	0	f	0.73
																							#	p (Arc)	L d (Arc)	L T	R d (Arc)	R T	tl (Arc)	p (m)	s (m)	tl (m)		19	9.63	0.66	r	0.25	r	0.91	1.05246	0.052459	0.0994536		9	5.65	0.39	r	0.85
																															0			20	10.12	0.27	f	2.1	u	2.37	1.10601	0.0535519	0.259016		10	5.77	0.27	r	2
																							1	1.44	1.58	R	0.82	R	2.4	0.157377	0.157377	0.262295		21	10.34	0	f	2.26	u	2.26	1.13005	0.0240437	0.246995		11	7.18	0.28	r	0
																							2	2	1.27	R	0.48	U	1.75	0.218579	0.0612022	0.191257		22	10.34	1.28	r	1.26	r	2.54	1.13005	0	0.277596		12	7.84	1.65	r	0.51
																							3	5.03	0.69	R	0.83	F	1.52	0.549727	0.331148	0.16612													13	7.93	0.43	r	1.82
																							4	5.32	2.41	U	2.01	U	4.42	0.581421	0.031694	0.48306		Participant 18											14	8.12	0.23	r	0
																							5	5.32	0	F	0.74	F	0.74	0.581421	0	0.0808743		#	p (Arc)	L d (Arc)	L T	R d (Arc)	R T	tl (Arc)	p (m)	s (m)	tl (m)		15	8.58	2.3	u	1.87
																							6	6.11	0	R	2.04	U	2.04	0.66776	0.0863388	0.222951										0			17	8.83	0	r	1.49
																							7	7.94	1.64	R	0.74	F	2.38	0.86776	0.2	0.260109		1	1.48	0.91	f	0.7	r	1.61	0.161749	0.161749	0.175956		16	9.05	0.97	r	1.31
																							8	8.03	0	R	1.79	R	1.79	0.877596	0.00983607	0.195628		2	1.98	1.67	r	0.5	r	2.17	0.216393	0.0546448	0.237158		18	9.05	0.69	f	0.13
																							9	8.64	0.73	F	2.06	U	2.79	0.944262	0.0666667	0.304918		3	2.34	0.63	r	1.04	r	1.67	0.255738	0.0393443	0.182514		19	9.23	0.28	f	0
																							10	8.82	1.05	U	2.11	u	3.16	0.963934	0.0196721	0.345355		4	5.03	0.66	r	0.81	f	1.47	0.549727	0.293989	0.160656		20	9.53	0.68	r	0.26
																							11	8.85	0.29	R	1.86	R	2.15	0.967213	0.00327869	0.234973		5	5.32	2.4	u	2.03	u	4.43	0.581421	0.031694	0.484153		21	10.07	0.32	f	0.4
																							12	9.61	0.75	R	1.85	U	2.6	1.05027	0.0830601	0.284153		6	5.73	0.3	r	2.03	u	2.33	0.62623	0.0448087	0.254645		22	10.25	0	f	2.11
																							13	9.65	2.34	U	0.08	F	2.42	1.05464	0.00437158	0.264481		7	5.86	0.28	r	2.02	u	2.3	0.640437	0.0142077	0.251366		23	10.25	1.15	r	1
																							14	10.15	0.47	F	0.17	F	0.64	1.10929	0.0546448	0.0699454		8	6.1	0.27	r	2.05	u	2.32	0.666667	0.0262295	0.253552
																							15	10.24	0.24	F	1.79	F	2.03	1.11913	0.00983607	0.221858		9	7.55	3.8	u	1.06	r	4.86	0.825137	0.15847	0.531148
																							16	10.32	0.1	F	2.03	U	2.13	1.12787	0.00874317	0.232787		10	7.92	2.3	u	0.83	f	3.13	0.865574	0.0404372	0.342077
																							17	10.35	1.64	R	0.91	R	2.55	1.13115	0.00327869	0.278689		11	8.04	0	r	1.86	r	1.86	0.878689	0.0131148	0.203279
																																		12	8.13	0.35	r	0.67	r	1.02	0.888525	0.00983607	0.111475
																																		13	8.63	1.16	f	2.05	u	3.21	0.943169	0.0546448	0.35082
																																		14	8.78	0.98	f	1.87	r	2.85	0.959563	0.0163934	0.311475
																																		15	8.87	0.26	r	2.1	u	2.36	0.969399	0.00983607	0.257923
																																		16	9.61	0.7	r	0.31	r	1.01	1.05027	0.0808743	0.110383
																																		17	10.23	0.21	f	1.96	r	2.17	1.11803	0.0677596	0.237158
																																		18	10.38	0.62	r	0.9	r	1.52	1.13443	0.0163934	0.16612
																																		Participant 19
																																		#	p (Arc)	L d (Arc)	L T	R d (Arc)	R T	tl (Arc)	p (m)	s (m)	tl (m)
																																										0
																																		1	1.98	2.71	u	1.36	r	4.07	0.216393	0.216393	0.444809
																																		2	1.98	1.8	r	0	f	1.8	0.216393	0	0.196721
																																		3	5.02	0.66	r	0.73	f	1.39	0.548634	0.33224	0.151913
																																		4	5.3	1.95	f	2.03	u	3.98	0.579235	0.0306011	0.434973
																																		5	5.3	0	f	0.78	f	0.78	0.579235	0	0.0852459
																																		6	7.52	3.54	f	1.11	r	4.65	0.821858	0.242623	0.508197
																																		7	7.92	1.65	r	1.56	r	3.21	0.865574	0.0437158	0.35082
																																		8	8.63	1.74	f	1.98	r	3.72	0.943169	0.0775956	0.406557
																																		9	8.77	0.14	f	1.83	r	1.97	0.95847	0.0153005	0.215301
																																		10	8.82	0.89	f	1.44	f	2.33	0.963934	0.00546448	0.254645
																																		11	9.63	0.71	r	0.35	r	1.06	1.05246	0.0885246	0.115847
																																		12	10.15	0.46	f	0.25	f	0.71	1.10929	0.0568306	0.0775956
																																		13	10.31	0.08	f	2.16	r	2.24	1.12678	0.0174863	0.244809
																																		14	10.36	1.58	r	0.73	r	2.31	1.13224	0.00546448	0.252459
[truncated: 5 more columns]
