# Supplementary material for: How do we see fractures? Quantifying subjective bias in fracture data collection
Source: Copernicus journal article supplement (doi:10.5194/se-10-487-2019), 2019-04-11
Supplement: Supplementary file 4 [file S6_Field circular scanline data_reviewedits.xlsx]

## Sheet: Summary
	Sheet name	Description																Circle radius
	C1	All sheets contain the raw Nc and node (i-, Y- ,and x) recorded by participants in the field and the fracture statistics (Intensity, Density, Connectivity and mean trace length) for the given circular scanline.																1
	C2																	1
	C3																	1
	C4																	1
	C5																	1
	C6																	0.73
	C7																	1.21
	Summary of recorded data	Nc								Node Count																Fracture statstics
		Nc				Nc (t)				i-node				y-node				x-node				Node time (s)				Mean trace length				Connectivity				Intensity				Density
	scanline	min	max	median	average	min	max		average	min	max		average	min	max		average	min	max		average	min	max		average	min	max		average	min	max		average	min	max		average	min	max		average
	C1	15	21	17	17.5	19	42	29.5	29.1667	0	3		1	12	21		17.6667	6	14		8.5	137	230		177.75	1.1781	2.17495		1.53841	0.971698	1		0.989324	3.75	5.25		4.375	2.06901	3.81972		2.97089
	C2	15	23	22	20.875	22	50	33.5	34.75	0	19		11.6667	20	54		38.1667	0	7		2.16667	168	358		241.4	0.500834	1.1781		0.739961	0.88	1		0.919	3.75	5.75		5.20833	3.1831	10.9817		7.93122
	C3	19	30	22	22.7778	20	58	38.5	38.5	3	15		9.2	21	33		28.4	6	16		9.6	162	282		244.4	0.824668	1.24355		0.982392	0.903448	0.966667		0.934322	4.75	7.5		5.75	3.81972	7.48028		5.98423
	C4	12	20	15	15	22	50	41	37	5	19		13	20	34		28.8	0	4		0.8	147	215		177.6	0.453114	0.682955		0.562952	0.821918	0.94382		0.872669	3	5		3.7	5.25211	8.27606		6.65268
	C5	12	19	15.5	15.5	12	43	21	22.625	4	8		5.83333	28	47		35.6667	2	8		4.16667	127	245		170.833	0.458149	0.761598		0.613366	0.941176	0.967532		0.955074	3.5	4.75		3.91667	5.09296	8.27606		6.60493
	C6	6	9	8	8	10	26	19	19	0	8		1.125	7	27		12	1	1		1	32	102		59.5	0.260303	1.46421		0.912305	0.913978	1		0.987015	2.06897	3.10345		2.75862	2.11954	10.5977		3.97414
	C7	13	21	19.5	18.5	19	57	27.5	33.3	0	18		8.5	11	60		29.5	0	3		1.75	85	335		184.875	0.48735	2.24624		1.15071	0.864865	1		0.925476	2.68595	4.33884		3.71901	1.19575	8.47899		4.13079
	Median	13	21	17	17.5	19	50	29.5	33.3	0	15	#NUM!	8.5	20	34	#NUM!	28.8	1	7	#NUM!	2.16667	137	245	#NUM!	177.75	0.48735	1.24355	#NUM!	0.912305	0.903448	1	#NUM!	0.934322	3.5	5	#NUM!	3.91667	3.1831	8.27606	#NUM!	5.98423
	min	6	9	8	8	10	26	19	19	0	3	0	1	7	21	0	12	0	1	0	0.8	32	102	0	59.5	0.260303	0.682955	0	0.562952	0.821918	0.94382	0	0.872669	2.06897	3.10345	0	2.75862	1.19575	3.81972	0	2.97089
	max	19	30	22	22.7778	22	58	41	38.5	5	19	0	13	28	60	0	38.1667	6	16	0	9.6	168	358	0	244.4	1.1781	2.24624	0	1.53841	0.971698	1	0	0.989324	4.75	7.5	0	5.75	5.25211	10.9817	0	7.93122
	Range	13	21	14	14.7778	12	32	22	19.5	5	16	0	12	21	39	0	26.1667	6	15	0	8.8	136	256	0	184.9	0.917794	1.56328	0	0.975455	0.14978	0.0561798	0	0.116655	2.68103	4.39655	0	2.99138	4.05636	7.16197	0	4.96033
	CoV	0.230769	0.119048	0.323529	0.253571	0.289474	0.22	0.398305	0.299675	#DIV/0!	0.7	#NUM!	0.818137	0.45	0.602941	#NUM!	0.331597	4	1.07143	#NUM!	2.28846	0.354015	0.35102	#NUM!	0.218964	0.424991	0.683311	#NUM!	0.427364	0.0610384	0.0329004	#NUM!	0.0522377	0.25915	0.191116	#NUM!	0.276297	0.742063	0.2006	#NUM!	0.430521

## Sheet: C1
	Data recorded in the field					Raw data									Fracture statistics
						Edge		Nodes
	P	radius	Q1	Q2	Q3	n	T(Nc) (s)	i	y	x	Nodes	T(Nodes) (s)	n	m	Tl	I	D	Pc
	A	1	4	4	4	15	22	0	20	7	27	230	15	20	1.1781	3.75	3.1831	1
	B	1	4	4	4	19	29	0	15	7	22	-	19	15	1.98968	4.75	2.38732	1
	C	1	3	3	3	16	42	0	20	7	27	194	16	20	1.25664	4	3.1831	1
	D	1	4	4	4	16	30	2	18	6	26	150	16	20	1.25664	4	3.1831	0.975
	F	1	1	1	1	18	19	1	12	14	27	-	18	13	2.17495	4.5	2.06901	0.989247
	G	1	3	3	3	21	33	3	21	10	34	137	21	24	1.37445	5.25	3.81972	0.971698
					Mean	17.5	29.1667	1	17.6667	8.5	27.1667	177.75	17.5	18.6667	1.53841	4.375	2.97089	0.989324
					Median	17	29.5	0.5	19	7	27	172	17	20	1.31554	4.25	3.1831	0.994624
					min	15	19	0	12	6	22	137	15	13	1.1781	3.75	2.06901	0.971698
					max	21	42	3	21	14	34	230	21	24	2.17495	5.25	3.81972	1
					Range	6	23	3	9	8	12	93	6	11	0.996852	1.5	1.7507	0.0283019
					CoV	0.161765	0.288136	3.5	0.223684	0.321429	0.0277778	0.327035	0.161765	0.1875	0.440299	0.161765	0.1875	0.0215541

## Sheet: C2
	Data recorded in the field					Raw data									Fracture statistics
						Edge		Nodes
	P	radius	Q1	Q2	Q3	Nc	T(Nc) (s)	i	y	x	Nodes	T(Nodes) (s)	n	m	Tl	I	D	Pc
	A	1	4	4	4	15	22	0	20	7	27	177	15	20	1.1781	3.75	3.1831	1
	B	1	4	4	4	23	47	8	30	0	38	244	23	38	0.950745	5.75	6.04789	0.918367
	C	1	3	3	3	22	50	15	34	2	51	260	22	49	0.705255	5.5	7.79859	0.88
	D	1	4	4	4	21	22	15	41	2	58	168	21	56	0.589049	5.25	8.91268	0.89726
	D	1	4	4	4	22	25	13	54	0	67		22	67	0.515784	5.5	10.6634	0.925714
	G	1	3	3	3	22	47	19	50	2	71	358	22	69	0.500834	5.5	10.9817	0.892655
					Repeats	22	42
						20	23
					Mean	20.875	34.75	11.6667	38.1667	2.16667	52	241.4	20.8333	49.8333	0.739961	5.20833	7.93122	0.919
					Median	22	33.5	14	37.5	2	54.5	244	22	52.5	0.647152	5.5	8.35563	0.907814
					min	15	22	0	20	0	27	168	15	20	0.500834	3.75	3.1831	0.88
					max	23	50	19	54	7	71	358	23	69	1.1781	5.75	10.9817	1
					Range	8	28	19	34	7	44	190	8	49	0.677264	2	7.79859	0.12
					CoV	0.0568182	0.723881	0.410714	0.446667	0.75	0.431193	0.340164	0.0340909	0.447619	0.548979	0.0340909	0.447619	0.0331246

## Sheet: C3
	Data recorded in the field					Raw data									Fracture statistics
						Edge		Nodes
	P	radius	Q1	Q2	Q3	Nc	T(Nc) (s)	i	y	x	Nodes	T(Nodes) (s)	n	m	Tl	I	D	Pc
	A	1	4	4	4	22	36	7	29	11	47	282	22	36	0.959931	5.5	5.72958	0.949275
	B	1	4	4	4	30	58	14	33	8	55	239	30	47	1.00264	7.5	7.48028	0.903448
	C	1	3	3	3	19	41	3	21	6	30	278	19	24	1.24355	4.75	3.81972	0.966667
	D	1	4	4	4	21	24	7	33	7	47	162	21	40	0.824668	5.25	6.3662	0.947761
	G	1	3	3	3	23	57	15	26	16	57	261	23	41	0.881178	5.75	6.52535	0.904459
					Repeats	22	48
						24
						22	20
						22	24
					Mean	22.7778	38.5	9.2	28.4	9.6	47.2	244.4	23	37.6	0.982392	5.75	5.98423	0.934322
					Median	22	38.5	7	29	8	47	261	22	40	0.959931	5.5	6.3662	0.947761
					min	19	20	3	21	6	30	162	19	24	0.824668	4.75	3.81972	0.903448
					max	30	58	15	33	16	57	282	30	47	1.24355	7.5	7.48028	0.966667
					Range	11	38	12	12	10	27	120	11	23	0.418879	2.75	3.66056	0.0632184
					CoV	0.0454545	0.681818	1	0.241379	0.5	0.170213	0.149425	0.0909091	0.125	0.126527	0.0909091	0.125	0.047287

## Sheet: C4
	Data recorded in the field					Raw data									Fracture statistics
						Edge		Nodes
	P	radius	Q1	Q2	Q3	Nc	T(Nc) (s)	i	y	x	Nodes	T(Nodes) (s)	n	m	Tl	I	D	Pc
	A	1	4	4	4	13	32	5	28	0	33	147	13	33	0.618799	3.25	5.25211	0.94382
	B	1	4	4	4	20	45	12	34	0	46	167	20	46	0.682955	5	7.32113	0.894737
	C	1	3	3	3	12	45	13	20	0	33	215	12	33	0.571199	3	5.25211	0.821918
	D	1	4	4	4	14	24	16	29	0	45	150	14	45	0.488692	3.5	7.16197	0.84466
	G	1	3	3	3	15	50	19	33	4	56	209	15	52	0.453114	3.75	8.27606	0.858209
					Repeats	15	41
						16	22
					Mean	15	37	13	28.8	0.8	42.6	177.6	14.8	41.8	0.562952	3.7	6.65268	0.872669
					Median	15	41	13	29	0	45	167	14	45	0.571199	3.5	7.16197	0.858209
					min	12	22	5	20	0	33	147	12	33	0.453114	3	5.25211	0.821918
					max	20	50	19	34	4	56	215	20	52	0.682955	5	8.27606	0.94382
					Range	8	28	14	14	4	23	68	8	19	0.229841	2	3.02394	0.121902
					CoV	0.133333	0.414634	0.307692	0.172414	#DIV/0!	0.288889	0.353293	0.142857	0.288889	0.227778	0.142857	0.288889	0.0583502
					range/median	0.533333	0.682927	1.07692	0.482759	#DIV/0!	0.511111	0.407186	0.571429	0.422222	0.402383	0.571429	0.422222	0.142043

## Sheet: C5
	Data recorded in the field					Raw data									Fracture statistics
						Edge		Nodes
	P	radius	Q1	Q2	Q3	Nc	T(Nc) (s)	i	y	x	Nodes	T(Nodes) (s)	n	m	Tl	I	D	Pc
	A	1	4	4	4	14	26	4	28	2	34	175	14	32	0.687223	3.5	5.09296	0.958333
	B	1	4	4	4	15	25	5	29	5	39	193	15	34	0.692998	3.75	5.41127	0.955357
	C	1	3	3	3	16	31	5	28	8	41	245	16	33	0.761598	4	5.25211	0.958678
	D	1	4	4	4	16	17	5	47	2	54	129	16	52	0.483322	4	8.27606	0.967532
	D	1	4	4	4	14	14	8	40	2	50	127	14	48	0.458149	3.5	7.63944	0.941176
	G	1	3	3	3	19	43	8	42	6	56	156	19	50	0.596903	4.75	7.95775	0.949367
					Repeats	12	12
						18	13
					Mean	15.5	22.625	5.83333	35.6667	4.16667	45.6667	170.833	15.6667	41.5	0.613366	3.91667	6.60493	0.955074
					Median	15.5	21	5	34.5	3.5	45.5	165.5	15.5	41	0.642063	3.875	6.52535	0.956845
					min	12	12	4	28	2	34	127	14	32	0.458149	3.5	5.09296	0.941176
					max	19	43	8	47	8	56	245	19	52	0.761598	4.75	8.27606	0.967532
					Range	7	31	4	19	6	22	118	5	20	0.303449	1.25	3.1831	0.026356
					CoV	0.16129	0.642857	0.45	0.384058	1.07143	0.296703	0.318731	0.112903	0.396341	0.280093	0.112903	0.396341	0.00807549
					range/median	0.451613	1.47619	0.8	0.550725	1.71429	0.483516	0.712991	0.322581	0.487805	0.472616	0.322581	0.487805	0.0275447

## Sheet: C6
	Data recorded in the field					Raw data									Fracture statistics
						Edge		Nodes
	P	radius	Q1	Q2	Q3	n	T(Nc) (s)	i	y	x	Nodes	T(Nodes) (s)	n	m	Tl	I	D	Pc
	B	0.725	4	4	4	9	22	0	12	1	13	66	9	12	0.854121	3.10345	3.6335	1
	C	0.725	3	3	3	8	22	0	7	1	8	68	8	7	1.30152	2.75862	2.11954	1
	C	0.725	3	3	3	6	17	0	7	1	8	40	6	7	0.976138	2.06897	2.11954	1
	D	0.725	4	4	4	9	17	0	9	1	10	52	9	9	1.13883	3.10345	2.72513	1
	D	0.725	4	4	4	8	20	1	17	1	19	61	8	18	0.506145	2.75862	5.45025	0.982143
	G	0.725	3	3	3	8	26	8	27	1	36	102	8	35	0.260303	2.75862	10.5977	0.913978
	E	0.725	1	1	1	7	10	0	10	1	11	32	7	10	0.797179	2.41379	3.02792	1
	F	0.725	3	3	3	9	14	0	7	1	8	55	9	7	1.46421	3.10345	2.11954	1
					Repeats	7	24
						8	18
						9	19
					Mean	8	19	1.125	12	1	14.125	59.5	8	13.125	0.912305	2.75862	3.97414	0.987015
					Median	8	19	0	9.5	1	10.5	58	8	9.5	0.915129	2.75862	2.87652	1
					min	6	10	0	7	1	8	32	6	7	0.260303	2.06897	2.11954	0.913978
					max	9	26	8	27	1	36	102	9	35	1.46421	3.10345	10.5977	1
					Range	3	16	8	20	0	28	70	3	28	1.2039	1.03448	8.47817	0.0860215
					CoV	0.1875	0.263158	#DIV/0!	0.657895	0	0.619048	0.301724	0.15625	0.684211	0.497284	0.15625	0.684211	0.00446429
					range/median	0.375	0.842105	#DIV/0!	2.10526	0	2.66667	1.2069	0.375	2.94737	1.31556	0.375	2.94737	0.0860215

## Sheet: C7
	Data recorded in the field					Raw data									Fracture statistics
						Edge		Nodes
	P	radius	Q1	Q2	Q3	Nc	T(Nc) (s)	i	y	x	Nodes	T(Nodes) (s)	n	m	Tl	I	D	Pc
	B	1.21	4	4	4	21	52	9	38	2	49	270	21	47	0.849233	4.33884	5.10913	0.931298
	C	1.21	3	3	3	17	42	7	29	3	39	223	17	36	0.897536	3.5124	3.91338	0.933962
	C	1.21	3	3	3	19	57	15	28	3	46	204	19	43	0.839828	3.92562	4.67431	0.864865
	D	1.21	4	4	4	21	28	5	21	0	26	85	21	26	1.53515	4.33884	2.82633	0.926471
	D	1.21	4	4	4	19	22	10	36	1	47	121	19	46	0.785057	3.92562	5.00043	0.918033
	G	1.21	3	3	3	20	42	18	60	3	81	335	20	78	0.48735	4.13223	8.47899	0.914286
	E	1.21	1	1	1	14	19	4	13	1	18	138	14	17	1.56525	2.89256	1.84798	0.914894
	F	1.21	3	3	3	13	20	0	11	1	12	103	13	11	2.24624	2.68595	1.19575	1
					Repeats	21	24
						20	27
					Mean	18.5	33.3	8.5	29.5	1.75	39.75	184.875	18	38	1.15071	3.71901	4.13079	0.925476
					Median	19.5	27.5	8	28.5	1.5	42.5	171	19	39.5	0.873384	3.92562	4.29385	0.922252
					min	13	19	0	11	0	12	85	13	11	0.48735	2.68595	1.19575	0.864865
					max	21	57	18	60	3	81	335	21	78	2.24624	4.33884	8.47899	1
					Range	8	38	18	49	3	69	250	8	67	1.75889	1.65289	7.28323	0.135135
					CoV	0.166667	0.709091	0.8125	0.614035	1.33333	0.552941	0.69152	0.210526	0.56962	0.820419	0.210526	0.56962	0.0186741
					range/median	0.410256	1.38182	2.25	1.7193	2	1.62353	1.46199	0.421053	1.6962	2.01388	0.421053	1.6962	0.146527
