# Supplementary material for: How do we see fractures? Quantifying subjective bias in fracture data collection
Source: Copernicus journal article supplement (doi:10.5194/se-10-487-2019), 2019-04-11
Supplement: Supplementary file 5 [file S7_Workshop circular scanline data_reviewer edits.xlsx]

## Sheet: Summary
	Sheet name	Description												Circle radius					Definitions and equations are provided in comments below and apply for all worksheets.
	Circle 8	All sheets contain the raw data (Nc, i-, y- and x- node), time taken to undertake Nc and node counts and the derived fracture statiscics for A) the recorded values and B) the marked values from participants of both workshops for that circle.												0.5 m
	Circle 5													1.0 m
	Circle 1													1.0 m
	Circle 4													1.0 m
	Circle 3													1.0 m
	Summary of recorded data		Nc						Node Count												Fracture statstics
			Nc			Nc (t)			i-node			y-node			x-node			Node time (s)			Mean trace length			Connectivity			Intensity			Density
	scanline	workshop	min	max	average	min	max	average	min	max	average	min	max	average	min	max	average	min	max	average	min	max	average	min	max	average	min	max	average	min	max	average
	C8	WS1	10	25	20.9091	29	180	80.3636	2	11	4.72727	1	60	25.5455	2	22	10.5455	150	780	389.727	0.289993	2.87979	0.861579	0.6875	0.987421	0.933239	5	12.5	10.4545	1.90986	41.3803	19.2722
		WS2	16	32	23.2222	45	240	112.778	1	16	5.16667	5	45	19.4444	5	18	10.8889	30	1440	626.556	0.340339	2.0944	0.967666	0.75	0.987421	0.947302	8	16	11.6111	3.81972	38.1972	15.6679
	C5	WS1	7	18	12.4545	20	120	52.3	3	14	6.36364	4	34	19.8182	1	6	2.27273	150	1177	357.364	0.478068	1.5708	0.869995	0.857143	0.957746	0.91303	1.75	4.5	3.11364	1.27324	7.32113	4.16697
		WS2	9	18	12.5556	20	298	89.2222	0	32	6.83333	7	41	16.7222	0	11	2.55556	60	1050	376.889	0.38732	2.0944	1.01522	0.76087	1	0.903644	2.25	4.5	3.13889	1.43239	11.6183	3.74898
	C1	WS1	14	23	18.0909	36	99	59.3636	0	12	2.09091	1	38	19.7273	4	11	7	119	447	447	0.805537	8.37758	2.1522	0.916084	1	0.978217	3.5	5.75	4.52273	0.477465	6.52535	3.47247
		WS2	11	25	18.0556	15	295	111.444	0	6	1.66667	4	34	18.1667	4	14	7.77778	82	1140	381.611	0.897598	5.10509	1.87766	0.90625	1	0.981813	2.75	6.25	4.51389	0.63662	6.3662	3.15657
	C4	WS1	11	18	14.8	60	330	131.8	7	19	11	6	27	14	1	4	2.8	324	521	405.4	0.614659	1.88496	1.06081	0.770833	0.9	0.818638	2.75	4.5	3.7	2.38732	7.32113	3.97887
		WS2	10	18	14.4286	64	323	176.571	5	23	8.85714	5	12.2857	12.2857	0	3	1.57143	115	720	347.143	0.861404	1.5708	1.16407	0.610169	0.94898	0.82078	2.5	4.5	3.60714	1.59155	5.09296	3.36499
	C3	WS1	18	22	19.75	55	90	75	4	24	22.25	19	24	22.25	5	11	6.75	208	521	343.25	0.785398	1.22932	1.0405	0.852941	0.952941	0.922383	4.5	5.5	4.9375	3.66056	7.00282	4.9338
		WS2	14	23	17.2857	52	713	242.286	2	54	4.85714	11	22	17.8571	3	10	4.85714	143	600	328.714	0.330694	2.17495	1.13519	0.602941	0.973333	0.868916	3.5	5.75	4.32143	2.06901	12.0958	5.04749
		Median	11	22.5	17.6706	40.5	267.5	100.333	2	17.5	5.76515	5	34	18.8056	2.5	11	5.80357	131	750	379.25	0.546364	2.0944	1.05065	0.765851	0.980377	0.917707	3.125	5.625	4.41766	1.7507	7.32113	4.07292
		min	7	18	12.4545	15	90	52.3	0	6	1.66667	1	12.2857	12.2857	0	3	1.57143	30	447	328.714	0.289993	1.22932	0.861579	0.602941	0.9	0.818638	1.75	4.5	3.11364	0.477465	5.09296	3.15657
		max	18	32	23.2222	64	713	242.286	7	54	22.25	19	60	25.5455	5	22	10.8889	324	1440	626.556	0.897598	8.37758	2.1522	0.916084	1	0.981813	8	16	11.6111	3.81972	41.3803	19.2722
		Range	11	14	10.7677	49	623	189.986	7	48	20.5833	18	47.7143	13.2597	5	19	9.31746	294	993	297.841	0.607605	7.14826	1.29062	0.313143	0.1	0.163175	6.25	11.5	8.49747	3.34225	36.2873	16.1156
		CoV	0.363636	0.288889	0.272418	0.790123	0.679439	0.505351	1.75	0.642857	0.622959	0.55	0.455882	0.148334	1.2	0.568182	0.855795	0.456107	0.769	0.136543	0.820731	0.503365	0.168746	0.199735	0.0435678	0.0721233	0.54	0.288889	0.272418	0.568182	0.728261	0.362753
	Summary of marked data		Nc						Node Count												Fracture statstics
			Nc			Nc (t)			i-node			y-node			x-node			Node time (s)			Mean trace length			Connectivity			Intensity			Density
	scanline	workshop	min	max	average	min	max	average	min	max	average	min	max	average	min	max	average	min	max	average	min	max	average	min	max	average	min	max	average	min	max	average
	C8	WS1	10	25	21.3636	29	180	80.3636	2	13	5.18182	1	62	28.3636	2	15	10.1818	150	780	389.727	0.251327	2.04204	0.726346	0.647059	0.986755	0.92758	5	12.5	10.6818	3.1831	47.7465	21.3557
		WS2	16	31	23.2941	45	240	112.778	1	14	5.35294	6	54	24.8824	2	54	13.6471	30	1440	626.556	0.288749	1.7952	0.808349	0.918919	0.988889	0.958815	8	15.5	11.6471	4.45634	43.2901	19.2484
	C5	WS1	16	23	18.2727	20	120	52.3	2	16	6.54545	4	34	20.0909	1	6	2.18182	150	1177	357.364	0.663225	3.14159	1.3491	0.833333	0.971429	0.911084	4	5.75	4.56818	1.27324	7.16197	4.23931
		WS2	13	23	18.4118	20	298	89.2222	0	33	6.82353	0	44	19.6471	0	11	3.17647	60	1050	376.889	0.469199	2.44346	1.30819	0.8125	1	0.918281	3.25	5.75	4.60294	1.43239	12.2549	4.21292
	C1	WS1	16	23	18.2727	36	99	59.3636	0	12	2.09091	9	38	23.5455	4	11	7.36364	119	447	447	0.739198	2.51327	1.318	0.916084	1	0.982483	4	5.75	4.56818	1.59155	6.52535	4.08015
		WS2	13	23	18.4118	15	295	111.444	0	5	1.35294	4	40	21.1765	4	14	8.29412	82	1140	381.611	0.802851	5.10509	1.67657	0.969697	1	0.98843	3.25	5.75	4.60294	0.63662	7.16197	3.58567
	C4	WS1	11	18	14.2	60	330	131.8	6	19	10.8	7	25	15	2	4	3.2	324	521	405.4	0.571199	1.76715	0.983083	0.795455	0.913043	0.838294	2.75	4.5	3.55	2.54648	7.00282	4.1062
		WS2	10	20	15.4286	64	323	176.571	5	22	8.57143	5	26	12.4286	0	5	1.85714	115	720	347.143	0.904398	1.7017	1.24896	0.706667	0.947368	0.832675	2.5	5	3.85714	1.59155	5.25211	3.34225
	C3	WS1	18	22	19.75	55	90	75	4	25	8.25	20	25	23.25	4	11	6.5	208	521	343.25	0.803663	1.1781	1.01407	0.868613	0.954545	0.927043	4.5	5.5	4.9375	3.81972	6.84366	5.01338
		WS2	14	21	18.2857	52	713	242.286	3	50	13.8571	12	26	18.8571	3	10	5	143	600	328.714	0.351362	1.6632	1.09146	0.652778	0.962963	0.870919	3.5	5.25	4.57143	2.70563	12.0958	5.20664
		Median	13.5	23	18.3487	40.5	267.5	100.333	2	17.5	6.68449	5.5	36	20.6337	2	11	5.75	131	750	379.25	0.617212	1.91862	1.17021	0.822917	0.979092	0.922662	3.75	5.75	4.58718	2.06901	7.16197	4.22612
		min	10	18	14.2	15	90	52.3	0	5	1.35294	0	25	12.4286	0	4	1.85714	30	447	328.714	0.251327	1.1781	0.726346	0.647059	0.913043	0.832675	2.5	4.5	3.55	0.63662	5.25211	3.34225
		max	18	31	23.2941	64	713	242.286	6	50	13.8571	20	62	28.3636	4	54	13.6471	324	1440	626.556	0.904398	5.10509	1.67657	0.969697	1	0.98843	8	15.5	11.6471	4.45634	47.7465	21.3557
		Range	8	13	9.09412	49	623	189.986	6	45	12.5042	20	37	15.9351	4	50	11.7899	294	993	297.841	0.65307	3.92699	0.950225	0.322638	0.0869565	0.155756	5.5	11	8.09706	3.81972	42.4944	18.0134
		CoV	0.333333	0.076087	0.0622775	0.790123	0.679439	0.505351	1.75	0.628571	0.488664	0.818182	0.472222	0.214066	1.25	0.568182	0.848547	0.456107	0.769	0.136543	0.657986	0.405377	0.277485	0.213087	0.0414388	0.0759174	0.3	0.076087	0.0622775	0.769231	0.744444	0.25358
	References
	Mauldon, M., Dunne, W.M. and Rohrbaugh Jr, M.B., 2001. Circualr scanlines and circular windows: new tools for characterizing the geometry of fracture traces. Journal of Structural Geology, 23(2-3), pp.247-258.
	Sanderson, D.J. and Nixon, C.W., 2015. The use of topology in fracture network characterization. Journal of Structural Geology, 72. pp.55-66

## Sheet: Circle 8
		A: Data recorded on the sheets					Raw data									Fracture statistics					B: Data marked on the sheets					Raw data									Fracture statistics
							Edge		Nodes																	Edge		Nodes
		radius	P	Q1	Q2	Q3	Nc	T(Nc) (s)	i	y	x	Nodes	T(Nodes) (s)	n	m	Tl	I	D	Pc		radius	P	Q1	Q2	Q3	Nc	T(Nc) (s)	i	y	x	Nodes	T(Nodes) (s)	n	m	Tl	I	D	Pc
		0.5	1	3	3	2	23	78	4	22	12	38	540	23	26	0.694775	11.5	16.5521	0.966102		0.5	1	3	3	2	24	78	5	25	13	43	540	24	30	0.628319	12	19.0986	0.962121
		0.5	2	1	1	1	11	107	2	1	3	6	378	11	3	2.87979	5.5	1.90986	0.882353		0.5	2	1	1	1	13	107	3	2	3	8	378	13	5	2.04204	6.5	3.1831	0.857143
		0.5	3	2	2	3	24	46	5	60	10	75	460	24	65	0.289993	12	41.3803	0.977778		0.5	3	2	2	3	25	46	4	55	12	71	460	25	59	0.332796	12.5	37.5606	0.981567
		0.5	4	4	3	3	22	106	6	28	9	43	602	22	34	0.508199	11	21.6451	0.952381		0.5	4	4	3	3	22	106	6	28	10	44	602	22	34	0.508199	11	21.6451	0.953846
		0.5	5	0	1	1	10	83	5	1	2	8	172	10	6	1.309	5	3.81972	0.6875		0.5	5	0	1	1	10	83	6	1	2	9	172	10	7	1.122	5	4.45634	0.647059
		0.5	6	2	3	2	25	52	4	27	12	43	312	25	31	0.633386	12.5	19.7352	0.969925		0.5	6	2	3	2	25	52	4	33	12	49	312	25	37	0.530674	12.5	23.5549	0.97351
		0.5	7	0	0	1	20	120	2	13	9	24	480	20	15	1.0472	10	9.5493	0.974026		0.5	7	0	0	1	21	120	2	15	9	26	480	21	17	0.970198	10.5	10.8225	0.975904
		0.5	8	3	3	3	25	36	6	26	15	47	150	25	32	0.613592	12.5	20.3718	0.958333		0.5	8	3	3	3	25	36	6	26	15	47	150	25	32	0.613592	12.5	20.3718	0.958333
		0.5	9	1	0	3	25	180	5	33	12	50	780	25	38	0.516709	12.5	24.1916	0.967105		0.5	9	1	0	3	25	180	6	34	12	52	780	25	40	0.490874	12.5	25.4648	0.961538
		0.5	10	4	4	4	21	29	2	23	22	47	171	21	25	0.659734	10.5	15.9155	0.987421		0.5	10	4	4	4	21	29	2	31	14	47	171	21	33	0.499799	10.5	21.0085	0.986755
		0.5	11	3	3	3	24	47	11	47	10	68	242	24	58	0.324992	12	36.9239	0.942708		0.5	11	3	3	3	24	47	13	62	10	85	242	24	75	0.251327	12	47.7465	0.945607
		0.5	12	4	3	3	24	102	4	42	8	54	1200	24	46	0.409773	12	29.2845	0.975309		0.5	12	4	3	3	24	102	4	48	10	62	1200	24	52	0.362491	12	33.1042	0.978723
		0.5	13	4	3	2	26	180	15	45	18	78	1380	26	60	0.340339	13	38.1972	0.932432		0.5	13	4	3	2	25	180	14	54	54	122	1380	25	68	0.288749	12.5	43.2901	0.964286
		0.5	14	4	3	3	28	109	4	23	9	36	705	28	27	0.814487	14	17.1887	0.963303		0.5	14	4	3	3	25	109	9	35	12	56	705	25	44	0.446249	12.5	28.0113	0.944444
		0.5	15	4	2	3	25	129	2	31	16	49	864	25	33	0.594999	12.5	21.0085	0.987421		0.5	15	4	2	3	25	129	2	38	16	56	864	25	40	0.490874	12.5	25.4648	0.988889
		0.5	16	3	2	1	24	105	5	14	12	31	660	24	19	0.992082	12	12.0958	0.947368		0.5	16	3	2	1	23	105	4	21	12	37	660	23	25	0.722566	11.5	15.9155	0.965217
		0.5	17	4	2	2	19	94	3	20	13	36	622	19	23	0.648807	9.5	14.6423	0.973913		0.5	17	4	2	2	20	94	3	26	13	42	622	20	29	0.541654	10	18.462	0.977444
		0.5	18	4	4	2	26	134	3	19	15	37	504	26	22	0.928198	13	14.0056	0.975		0.5	18	4	4	2	26	134	3	25	13	41	504	26	28	0.729298	13	17.8254	0.976923
		0.5	19	1	1	1	22	210	4	26	8	38	598	22	30	0.575959	11	19.0986	0.964912		0.5	19	1	1	1	21	210	4	27	8	39	598	21	31	0.532044	10.5	19.7352	0.965812
		0.5	20	1	1	1	16	45	1	5	5	11	125	16	6	2.0944	8	3.81972	0.972222		0.5	20	1	1	1	16	45	1	6	5	12	125	16	7	1.7952	8	4.45634	0.974359
		0.5	21	4	4	4	25	55	4	6	18	28	295	25	10	1.9635	12.5	6.3662	0.957447		0.5	21	4	4	4	25	55	4	9	14	27	295	25	13	1.51038	12.5	8.27606	0.954023
		0.5	22	3	2	1	18	98	5	7	7	19	730	18	12	1.1781	9	7.63944	0.907407		0.5	22	3	2	1	19	98	6	8	11	25	730	19	14	1.0659	9.5	8.91268	0.918919
		0.5	23	3	4	2	25	120	16	8	6	30	300	25	24	0.818123	12.5	15.2789	0.75		0.5	23	3	4	2	22	120	1	10	2	13	300	22	11	1.5708	11	7.00282	0.974359
		0.5	24	4	4	4	22	120	4	7	12	23	600	22	11	1.5708	11	7.00282	0.945205		0.5	24	4	4	4	22	120	4	9	12	25	600	22	13	1.32914	11	8.27606	0.949367
		0.5	25	3	2	1	23	70	2	18	6	26	240	23	20	0.903208	11.5	12.7324	0.975		0.5	25	3	2	1	25	70	9	34	13	56	240	25	43	0.456627	12.5	27.3747	0.944785
		0.5	26	3	2	2	32	121	8	29	12	49	458	32	37	0.679263	16	23.5549	0.944056		0.5	26	3	2	2	31	121	9	26	10	45	458	31	35	0.695638	15.5	22.2817	0.929134
		0.5	27	4	4	3	20	52	4	21	9	34	527	20	25	0.628319	10	15.9155	0.961165		0.5	27	4	4	3	20	52	5	24	14	43	527	20	29	0.541654	10	18.462	0.962406
		0.5	28	1	1	1	16	46	1	7	9	17	30	16	8	1.5708	8	5.09296	0.982759			28
		0.5	29	3	4	3	27	240	8	22	13	43	1440	27	30	0.706858	13.5	19.0986	0.936508		0.5	29	3	4	3	27	240	9	23	13	45	1440	27	32	0.66268	13.5	20.3718	0.930769
			Total	Mean			22.3448	100.483	5	21.7586	10.7586	37.5172	536.724	22.3448	26.7586	0.927426	11.1724	17.0351	0.941968			Total	Mean			22.5357	102.429	5.28571	26.25	12.2857	43.8214	554.821	22.5357	31.5357	0.776134	11.2679	20.0763	0.946544
				Median			24	102	4	22	10	37	504	24	25	0.694775	12	15.9155	0.963303				Median			24	103.5	4	26	12	43.5	515.5	24	31.5	0.577623	12	20.0535	0.962264
				min			10	29	1	1	2	6	30	10	3	0.289993	5	1.90986	0.6875				min			10	29	1	1	2	8	125	10	5	0.251327	5	3.1831	0.647059
				max			32	240	16	60	22	78	1440	32	65	2.87979	16	41.3803	0.987421				max			31	240	14	62	54	122	1440	31	75	2.04204	15.5	47.7465	0.988889
				Range			22	211	15	59	20	72	1410	22	62	2.5898	11	39.4704	0.299921				Range			21	211	13	61	52	114	1315	21	70	1.79071	10.5	44.5634	0.34183
				CoV			0.208333	0.666667	0.5	0.909091	0.5	0.567568	0.724206	0.208333	0.72	0.650856	0.208333	0.72	0.0311117				CoV			0.166667	0.637681	0.75	0.778846	0.25	0.603448	0.722599	0.166667	0.753968	0.871241	0.166667	0.753968	0.0304945
			WS1	Mean			20.9091	80.3636	4.72727	25.5455	10.5455	40.8182	389.727	20.9091	30.2727	0.861579	10.4545	19.2722	0.933239			Total	Mean			21.3636	80.3636	5.18182	28.3636	10.1818	43.7273	389.727	21.3636	33.5455	0.726346	10.6818	21.3557	0.92758
				Median			23	78	5	26	10	43	378	23	31	0.633386	11.5	19.7352	0.966102				Median			24	78	5	28	12	47	378	24	33	0.530674	12	21.0085	0.961538
				min			10	29	2	1	2	6	150	10	3	0.289993	5	1.90986	0.6875				min			10	29	2	1	2	8	150	10	5	0.251327	5	3.1831	0.647059
				max			25	180	11	60	22	75	780	25	65	2.87979	12.5	41.3803	0.987421				max			25	180	13	62	15	85	780	25	75	2.04204	12.5	47.7465	0.986755
				Range			15	151	9	59	20	69	630	15	62	2.5898	7.5	39.4704	0.299921				Range			15	151	11	61	13	77	630	15	70	1.79071	7.5	44.5634	0.339696
				CoV			0.173913	0.769231	0.5	0.5	0.3	0.406977	0.801587	0.173913	0.516129	0.566057	0.173913	0.516129	0.025288				CoV			0.166667	0.769231	0.5	0.482143	0.25	0.340426	0.801587	0.166667	0.454545	0.572709	0.166667	0.454545	0.0259796
			WS2	Mean			23.2222	112.778	5.16667	19.4444	10.8889	35.5	626.556	23.2222	24.6111	0.967666	11.6111	15.6679	0.947302			Total	Mean			23.2941	116.706	5.35294	24.8824	13.6471	43.8824	661.647	23.2941	30.2353	0.808349	11.6471	19.2484	0.958815
				Median			24	107	4	19.5	10.5	35	599	24	23.5	0.816305	12	14.9606	0.962234				Median			24	109	4	25	12	42	600	24	29	0.66268	12	18.462	0.964286
				min			16	45	1	5	5	11	30	16	6	0.340339	8	3.81972	0.75				min			16	45	1	6	2	12	125	16	7	0.288749	8	4.45634	0.918919
				max			32	240	16	45	18	78	1440	32	60	2.0944	16	38.1972	0.987421				max			31	240	14	54	54	122	1440	31	68	1.7952	15.5	43.2901	0.988889
				Range			16	195	15	40	13	67	1410	16	54	1.75406	8	34.3775	0.237421				Range			15	195	13	48	52	110	1315	15	61	1.50645	7.5	38.8338	0.06997
				CoV			0.21875	0.476636	0.5	0.923077	0.47619	0.435714	0.641486	0.21875	0.691489	0.610253	0.21875	0.691489	0.0315775				CoV			0.166667	0.321101	1.5	0.96	0.25	0.690476	0.453333	0.166667	0.896552	0.867725	0.166667	0.896552	0.030669

## Sheet: Circle 5
	A: Data recorded on the sheets					Raw data									Fracture statistics					B: Data marked on the sheets					Raw data									Fracture statistics
						Edge		Nodes																	Edge		Nodes
	radius	P	Q1	Q2	Q3	Nc	T(Nc) (s)	i	y	x	Nodes	T(Nodes) (s)	n	m	Tl	I	D	Pc		radius	P	Q1	Q2	Q3	Nc	T(Nc) (s)	i	y	x	Nodes	T(Nodes) (s)	n	m	Tl	I	D	Pc
	1	P1	3	3	2	11	70	9	24	2	35	324	11	33	0.523599	2.75	5.25211	0.898876		1	P1	3	3	2	13	70	10	27	2	39	324	21	37	0.891533	5.25	5.88873	0.89899
	1	P2	1	1	1	8	59	4	4	3	11	317	8	8	1.5708	2	1.27324	0.857143		1	P2	1	1	1	8	59	4	4	2	10	317	16	8	3.14159	4	1.27324	0.833333
	1	P3	2	2	3	14		12	34	2	48	1177	14	46	0.478068	3.5	7.32113	0.901639		1	P3	2	2	3	14		11	34	2	47	1177	20	45	0.698132	5	7.16197	0.909091
	1	P4	4	3	3	12	53	3	17	1	21	333	12	20	0.942478	3	3.1831	0.948276		1	P4	4	3	3	12	53	3	17	1	21	333	16	20	1.25664	4	3.1831	0.948276
	1	P5	0	1	1	7	70	3	7	1	11	150	7	10	1.09956	1.75	1.59155	0.892857		1	P5	0	1	1	7	70	3	8	1	12	150	16	11	2.28479	4	1.7507	0.903226
	1	P6	2	3	2	14	32	5	26	1	32	330	14	31	0.709392	3.5	4.9338	0.942529		1	P6	2	3	2	14	32	6	25	1	32	330	23	31	1.16543	5.75	4.9338	0.929412
	1	P7	0	0	1	11	30	3	20	2	25	300	11	23	0.75125	2.75	3.66056	0.957746		1	P7	0	0	1	11	30	2	20	2	24	300	17	22	1.2138	4.25	3.50141	0.971429
	1	P8	3	3	3	16	28	7	12	6	25	150	16	19	1.32278	4	3.02394	0.895522		1	P8	3	3	3	16	28	7	12	6	25	150	19	19	1.5708	4.75	3.02394	0.895522
	1	P9	1	0	3	14	120	5	24	4	33	480	14	29	0.758315	3.5	4.61549	0.946237		1	P9	1	0	3	14	120	5	24	4	33	480	16	29	0.866646	4	4.61549	0.946237
	1	P10	4	4	4	12	20	5	19	1	25	186	12	24	0.785398	3	3.81972	0.924242		1	P10	4	4	4	12	20	5	21	1	27	186	18	26	1.08747	4.5	4.13803	0.930556
	1	P11	3	3	3	18	41	14	31	2	47	184	18	45	0.628319	4.5	7.16197	0.878261		1	P11	3	3	3	16	41	16	29	2	47	184	19	45	0.663225	4.75	7.16197	0.855856
	1	P12	4	3	3	13	298	4	26	1	31	235	13	30	0.680678	3.25	4.77465	0.953488		1	P12	4	3	3	13	298	6	28	1	35	235	18	34	0.831598	4.5	5.41127	0.93617
	1	P13	4	3	2	18	60	32	41	6	79	900	18	73	0.38732	4.5	11.6183	0.821229		1	P13	4	3	2	18	60	33	44	11	88	900	23	77	0.469199	5.75	12.2549	0.842105
	1	P14	4	3	3	12	80	7	16	1	24	451	12	23	0.819546	3	3.66056	0.881356		1	P14	4	3	3	13	80	9	20	1	30	451	21	29	1.13747	5.25	4.61549	0.876712
	1	P15	4	2	3	16	64	5	32	5	42	737	16	37	0.679263	4	5.88873	0.958678		1	P15	4	2	3	16	64	6	37	7	50	737	23	43	0.840193	5.75	6.84366	0.958621
	1	P16	3	2	1	13	89	13	14	0	27	600	13	27	0.756309	3.25	4.29718	0.763636		1	P16	3	2	1	14	89	9	13	0	22	600	18	22	1.2852	4.5	3.50141	0.8125
	1	P17	4	2	2	11	58	6	15	7	28	310	11	21	0.822798	2.75	3.34225	0.924051		1	P17	4	2	2	14	58	6	15	7	28	310	21	21	1.5708	5.25	3.34225	0.924051
	1	P18	4	4	2	12	71	2	13	2	17	235	12	15	1.25664	3	2.38732	0.959184		1	P18	4	4	2	13	71	4	17	6	27	235	19	21	1.4212	4.75	3.34225	0.949367
	1	P19	1	1	1	9	112	4	14	1	19	350	9	18	0.785398	2.25	2.86479	0.92		1	P19	1	1	1	13	112	4	13	1	18	350	21	17	1.9404	5.25	2.70563	0.914894
	1	P20	1	1	1	12	240	2	23	2	27	325	12	25	0.753982	3	3.97887	0.974684		1	P20	1	1	1	13	240	2	27	2	31	325	19	29	1.02914	4.75	4.61549	0.978022
	1	P21	4	4	4	14	33	7	10	11	28	237	14	17	1.2936	3.5	2.70563	0.91358		1	P21	4	4	4	13	33	6	20	4	30	237	19	26	1.14789	4.75	4.13803	0.926829
	1	P22	3	2	1	11	131	3	11	1	15	517	11	14	1.2342	2.75	2.22817	0.925		1	P22	3	2	1	12	131	2	15	1	18	517	13	17	1.2012	3.25	2.70563	0.960784
	1	P23	3	4	2	11	60	11	9	2	22	120	11	20	0.863938	2.75	3.1831	0.76087		1	P23	3	4	2	13	60	0	9	2	11	120	14	9	2.44346	3.5	1.43239	1
	1	P24	4	4	4	12	120	3	7	2	12	180	12	10	1.88496	3	1.59155	0.90625		1	P24	4	4	4	12	120	3	7	2	12	180	15	10	2.35619	3.75	1.59155	0.90625
	1	P25	3	2	1	12	20	2	11	0	13	60	12	13	1.44997	3	2.06901	0.942857		1	P25	3	2	1	14	20	3	18	3	24	60	16	21	1.1968	4	3.34225	0.956522
	1	P26	3	2	2	12	34	11	14	3	28	165	12	25	0.753982	3	3.97887	0.830769		1	P26	3	2	2	13	34	12	15	4	31	165	18	27	1.0472	4.5	4.29718	0.835616
	1	P27	4	4	3	12	25	2	18	0	20	252	12	20	0.942478	3	3.1831	0.964286		1	P27	4	4	3	12	25	2	18	1	21	252	14	20	1.09956	3.5	3.1831	0.966667
	1	P28	1	1	1	12	21	0	9	1	10	60	12	9	2.0944	3	1.43239	1			28
	1	P29	3	4	3	14	90	9	18	1	28	1050	14	27	0.814487	3.5	4.29718	0.865672		1	P29	3	4	3	14	90	9	18	1	28	1050	21	27	1.22173	5.25	4.29718	0.865672
		Total	Mean			12.5172	76.0357	6.65517	17.8966	2.44828	27	369.483	12.5172	24.5517	0.960134	3.12931	3.90753	0.907204			Total	Mean			13.1071	78.0741	6.71429	19.8214	2.78571	29.3214	380.536	18.3571	26.5357	1.32426	4.58929	4.22329	0.915454
			Median			12	60	5	16	2	25	310	12	23	0.814487	3	3.66056	0.92				Median			13	60	5.5	18	2	27.5	313.5	18.5	24	1.18111	4.625	3.81972	0.92544
			min			7	20	0	4	0	10	60	7	8	0.38732	1.75	1.27324	0.76087				min			7	20	0	4	0	10	60	13	8	0.469199	3.25	1.27324	0.8125
			max			18	298	32	41	11	79	1177	18	73	2.0944	4.5	11.6183	1				max			18	298	33	44	11	88	1177	23	77	3.14159	5.75	12.2549	1
			Range			11	278	32	37	11	69	1117	11	65	1.70708	2.75	10.3451	0.23913				Range			11	278	33	40	11	78	1117	10	69	2.67239	2.5	10.9817	0.1875
			CoV			0.25	0.941667	1.2	0.8125	1	0.48	0.86129	0.25	0.521739	0.592946	0.25	0.521739	0.0727391				CoV			0.153846	0.933333	1.09091	0.611111	1.5	0.409091	0.870016	0.27027	0.40625	0.392728	0.27027	0.40625	0.065197
		WS1	Mean			12.4545	52.3	6.36364	19.8182	2.27273	28.4545	357.364	12.4545	26.1818	0.869995	3.11364	4.16697	0.91303			Total	Mean			12.4545	52.3	6.54545	20.0909	2.18182	28.8182	357.364	18.2727	26.6364	1.3491	4.56818	4.23931	0.911084
			Median			12	47	5	20	2	25	317	12	24	0.758315	3	3.81972	0.901639				Median			13	47	5	21	2	27	317	18	26	1.16543	4.5	4.13803	0.909091
			min			7	20	3	4	1	11	150	7	8	0.478068	1.75	1.27324	0.857143				min			7	20	2	4	1	10	150	16	8	0.663225	4	1.27324	0.833333
			max			18	120	14	34	6	48	1177	18	46	1.5708	4.5	7.32113	0.957746				max			16	120	16	34	6	47	1177	23	45	3.14159	5.75	7.16197	0.971429
			Range			11	100	11	30	5	37	1027	11	38	1.09273	2.75	6.04789	0.100604				Range			9	100	14	30	5	37	1027	7	37	2.47837	1.75	5.88873	0.138095
			CoV			0.25	0.781915	0.9	0.525	0.75	0.44	0.462145	0.25	0.520833	0.464401	0.25	0.520833	0.0556685				CoV			0.192308	0.781915	1	0.547619	0.5	0.5	0.462145	0.194444	0.557692	0.458738	0.194444	0.557692	0.0452539
		WS2	Mean			12.5556	89.2222	6.83333	16.7222	2.55556	26.1111	376.889	12.5556	23.5556	1.01522	3.13889	3.74898	0.903644			Total	Mean			13.5294	93.2353	6.82353	19.6471	3.17647	29.6471	395.529	18.4118	26.4706	1.30819	4.60294	4.21292	0.918281
			Median			12	67.5	4.5	14	1.5	25.5	281	12	20.5	0.821172	3	3.26268	0.922025				Median			13	71	6	18	2	28	310	19	22	1.1968	4.75	3.50141	0.926829
			min			9	20	0	7	0	10	60	9	9	0.38732	2.25	1.43239	0.76087				min			12	20	0	7	0	11	60	13	9	0.469199	3.25	1.43239	0.8125
			max			18	298	32	41	11	79	1050	18	73	2.0944	4.5	11.6183	1				max			18	298	33	44	11	88	1050	23	77	2.44346	5.75	12.2549	1
			Range			9	278	32	34	11	69	990	9	64	1.70708	2.25	10.1859	0.23913				Range			6	278	33	37	11	77	990	10	68	1.97426	2.5	10.8225	0.1875
			CoV			0.0833333	0.985185	1.38889	0.5	1.16667	0.411765	1.09164	0.0833333	0.536585	0.604579	0.0833333	0.536585	0.0952117				CoV			0.0769231	0.760563	1	0.277778	1.5	0.357143	0.909677	0.263158	0.409091	0.3125	0.263158	0.409091	0.0883748

## Sheet: Circle 1
	A: Data recorded on the sheets					Raw data									Fracture statistics					B: Data marked on the sheets					Raw data									Fracture statistics
						Edge		Nodes																	Edge		Nodes
	radius	P	Q1	Q2	Q3	Nc	T(Nc) (s)	i	y	x	Nodes	T(Nodes) (s)	n	m	Tl	I	D	Pc		radius	P	Q1	Q2	Q3	Nc	T(Nc) (s)	i	y	x	Nodes	T(Nodes) (s)	n	m	Tl	I	D	Pc
	1	P1	3	3	2	21	68	2	32	7	41	337	21	34	0.970198	5.25	5.41127	0.984127		1	P1	3	3	2	21	68	2	34	7	43	337	21	36	0.916298	5.25	5.72958	0.984848
	1	P2	1	1	1	16	99	2	1	8	11	259	16	3	8.37758	4	0.477465	0.945946		1	P2	1	1	1	16	99	2	32	4	38	259	16	34	0.739198	4	5.41127	0.982456
	1	P3	2	2	3	20	72	1	38	7	46	447	20	39	0.805537	5	6.20704	0.993007		1	P3	2	2	3	20	72	1	38	7	46	447	20	39	0.805537	5	6.20704	0.993007
	1	P4	4	3	3	16	50	0	18	7	25	119	16	18	1.39626	4	2.86479	1		1	P4	4	3	3	16	50	0	18	7	25	119	16	18	1.39626	4	2.86479	1
	1	P5	0	1	1	14	70	1	5	5	11	120	14	6	3.66519	3.5	0.95493	0.972222		1	P5	0	1	1	16	70	1	9	5	15	120	16	10	2.51327	4	1.59155	0.979167
	1	P6	2	3	2	23	51	12	29	11	52	416	23	41	0.881178	5.75	6.52535	0.916084		1	P6	2	3	2	23	51	12	29	11	52	416	23	41	0.881178	5.75	6.52535	0.916084
	1	P7	0	0	1	17	60	0	16	10	26	300	17	16	1.66897	4.25	2.54648	1		1	P7	0	0	1	17	60	0	16	10	26	300	17	16	1.66897	4.25	2.54648	1
	1	P8	3	3	3	19	38	3	20	8	31	211	19	23	1.29761	4.75	3.66056	0.968421		1	P8	3	3	3	19	38	3	20	8	31	211	19	23	1.29761	4.75	3.66056	0.968421
	1	P9	1	0	3	16	60	0	12	5	17	240	16	12	2.0944	4	1.90986	1		1	P9	1	0	3	16	60	0	13	7	20	240	16	13	1.93329	4	2.06901	1
	1	P10	4	4	4	18	49	0	19	4	23	141	18	19	1.48812	4.5	3.02394	1		1	P10	4	4	4	18	49	0	20	8	28	141	18	20	1.41372	4.5	3.1831	1
	1	P11	3	3	3	19	36	2	27	5	34	125	19	29	1.02914	4.75	4.61549	0.980583		1	P11	3	3	3	19	36	2	30	7	39	125	19	32	0.93266	4.75	5.09296	0.983333
	1	P12	4	3	3	18	295	2	25	6	33	290	18	27	1.0472	4.5	4.29718	0.980198		1	P12	4	3	3	18	295	2	26	6	34	290	18	28	1.0098	4.5	4.45634	0.980769
	1	P13	4	3	2	25	60	6	34	10	50	540	25	40	0.981748	6.25	6.3662	0.959459		1	P13	4	3	2	23	60	5	40	10	55	540	23	45	0.802851	5.75	7.16197	0.969697
	1	P14	4	3	3	21	107	1	18	9	28	538	21	19	1.73614	5.25	3.02394	0.989011		1	P14	4	3	3	21	107	2	27	7	36	538	21	29	1.13747	5.25	4.61549	0.981982
	1	P15	4	2	3	22	80	1	34	8	43	528	22	35	0.987358	5.5	5.57042	0.992593		1	P15	4	2	3	23	80	1	38	10	49	528	23	39	0.926367	5.75	6.20704	0.993548
	1	P16	3	2	1	19	230	1	20	4	25	259	19	21	1.4212	4.75	3.34225	0.987013		1	P16	3	2	1	18	230	2	24	5	31	259	18	26	1.08747	4.5	4.13803	0.978723
	1	P17	4	2	2	20	48	2	13	14	29	509	20	15	2.0944	5	2.38732	0.979381		1	P17	4	2	2	21	48	2	15	14	31	509	21	17	1.9404	5.25	2.70563	0.980583
	1	P18	4	4	2	19	84	0	10	7	17	186	19	10	2.98451	4.75	1.59155	1		1	P18	4	4	2	19	84	0	12	9	21	186	19	12	2.48709	4.75	1.90986	1
	1	P19	1	1	1	20	176	3	32	4	39	430	20	35	0.897598	5	5.57042	0.973913		1	P19	1	1	1	21	176	3	32	4	39	430	21	35	0.942478	5.25	5.57042	0.973913
	1	P20	1	1	1	18	254	1	18	6	25	217	18	19	1.48812	4.5	3.02394	0.987342		1	P20	1	1	1	19	254	1	18	8	27	217	19	19	1.5708	4.75	3.02394	0.988506
	1	P21	4	4	4	22	45	4	12	8	24	289	22	16	2.15984	5.5	2.54648	0.944444		1	P21	4	4	4	19	45	0	11	9	20	289	19	11	2.71319	4.75	1.7507	1
	1	P22	3	2	1	13	74	0	4	10	14	550	13	4	5.10509	3.25	0.63662	1		1	P22	3	2	1	13	74	0	4	10	14	550	13	4	5.10509	3.25	0.63662	1
	1	P23	3	4	2	15	120	6	10	7	23	540	15	16	1.47262	3.75	2.54648	0.90625		1	P23	3	4	2	14	120	0	12	7	19	540	14	12	1.8326	3.5	1.90986	1
	1	P24	4	4	4	11	120	0	9	6	15	240	11	9	1.91986	2.75	1.43239	1		1	P24	4	4	4	15	120	0	11	9	20	240	15	11	2.14199	3.75	1.7507	1
	1	P25	3	2	1	16	40	0	21	6	27	180	16	21	1.1968	4	3.34225	1		1	P25	3	2	1	16	40	3	26	8	37	180	16	29	0.866646	4	4.61549	0.973451
	1	P26	3	2	2	17	46	2	25	8	35	138	17	27	0.98902	4.25	4.29718	0.981651		1	P26	3	2	2	18	46	1	26	8	35	138	18	27	1.0472	4.5	4.29718	0.990991
	1	P27	4	4	3	15	32	0	12	7	19	213	15	12	1.9635	3.75	1.90986	1		1	P27	4	4	3	14	32	0	14	7	21	213	14	14	1.5708	3.5	2.22817	1
	1	P28	1	1	1	13	15	0	5	10	15	82	13	5	4.08407	3.25	0.795775	1			28
	1	P29	3	4	3	21	180	1	25	10	36	1140	21	26	1.26872	5.25	4.13803	0.991379		1	P29	3	4	3	21	180	1	24	10	35	1140	21	25	1.31947	5.25	3.97887	0.99115
		WS1	Mean			18.069	91.6897	1.82759	18.7586	7.48276	28.069	330.483	18.069	20.5862	1.98179	4.51724	3.2764	0.980449			WS1	Mean			18.3571	94.4286	1.64286	22.1071	7.92857	31.6786	339.357	18.3571	23.75	1.5357	4.58929	3.77993	0.986094
			Median			18	68	1	18	7	26	259	18	19	1.47262	4.5	3.02394	0.987342				Median			18.5	69	1	22	8	31	274	18.5	24	1.30854	4.625	3.81972	0.989748
			min			11	15	0	1	4	11	82	11	3	0.805537	2.75	0.477465	0.90625				min			13	32	0	4	4	14	119	13	4	0.739198	3.25	0.63662	0.916084
			max			25	295	12	38	14	52	1140	25	41	8.37758	6.25	6.52535	1				max			23	295	12	40	14	55	1140	23	45	5.10509	5.75	7.16197	1
			Range			14	280	12	37	10	41	1058	14	38	7.57204	3.5	6.04789	0.09375				Range			10	263	12	36	10	41	1021	10	41	4.36589	2.5	6.52535	0.0839161
			CoV			0.222222	0.867647	2	0.722222	0.428571	0.615385	1.00772	0.222222	0.789474	0.723372	0.222222	0.789474	0.0264214				CoV			0.27027	0.891304	2	0.704545	0.28125	0.556452	0.940693	0.27027	0.78125	0.708179	0.27027	0.78125	0.0199762
		WS1	Mean			18.0909	59.3636	2.09091	19.7273	7	28.8182	246.818	18.0909	21.8182	2.1522	4.52273	3.47247	0.978217			Total	Mean			18.2727	59.3636	2.09091	23.5455	7.36364	33	246.818	18.2727	25.6364	1.318	4.56818	4.08015	0.982483
			Median			18	60	1	19	7	26	240	18	19	1.39626	4.5	3.02394	0.984127				Median			18	60	1	20	7	31	240	18	23	1.29761	4.5	3.66056	0.984848
			min			14	36	0	1	4	11	119	14	3	0.805537	3.5	0.477465	0.916084				min			16	36	0	9	4	15	119	16	10	0.739198	4	1.59155	0.916084
			max			23	99	12	38	11	52	447	23	41	8.37758	5.75	6.52535	1				max			23	99	12	38	11	52	447	23	41	2.51327	5.75	6.52535	1
			Range			9	63	12	37	7	41	328	9	38	7.57204	2.25	6.04789	0.0839161				Range			7	63	12	29	7	37	328	7	31	1.77408	1.75	4.9338	0.0839161
			CoV			0.194444	0.325	2	0.736842	0.428571	0.673077	0.772917	0.194444	0.921053	0.631695	0.194444	0.921053	0.030157				CoV			0.194444	0.325	2	0.7	0.142857	0.5	0.772917	0.194444	0.782609	0.495221	0.194444	0.782609	0.0194838
		WS2	Mean			18.0556	111.444	1.66667	18.1667	7.77778	27.6111	381.611	18.0556	19.8333	1.87766	4.51389	3.15657	0.981813			Total	Mean			18.4118	117.118	1.35294	21.1765	8.29412	30.8235	399.235	18.4118	22.5294	1.67657	4.60294	3.58567	0.98843
			Median			18.5	82	1	18	7.5	26	289.5	18.5	19	1.48037	4.625	3.02394	0.988176				Median			19	84	1	24	8	31	290	19	25	1.31947	4.75	3.97887	0.990991
			min			11	15	0	4	4	14	82	11	4	0.897598	2.75	0.63662	0.90625				min			13	32	0	4	4	14	138	13	4	0.802851	3.25	0.63662	0.969697
			max			25	295	6	34	14	50	1140	25	40	5.10509	6.25	6.3662	1				max			23	295	5	40	14	55	1140	23	45	5.10509	5.75	7.16197	1
			Range			14	280	6	30	10	36	1058	14	36	4.20749	3.5	5.72958	0.09375				Range			10	263	5	36	10	41	1002	10	41	4.30224	2.5	6.52535	0.030303
			CoV			0.297297	1.40854	2	0.805556	0.5	0.557692	1.11054	0.297297	0.736842	0.660018	0.297297	0.736842	0.0206587				CoV			0.263158	1.52381	2	0.583333	0.375	0.483871	1.1069	0.263158	0.68	0.705282	0.263158	0.68	0.019594

## Sheet: Circle 4
	A: Data recorded on the sheets					Participant experience									Raw data									Fracture statistics					B: Data marked on the sheets					Participant experience									Raw data
						ID 1 details			ID 2 details			ID 3 details			Edge		Nodes																	ID 1 details			ID 2 details			ID 3 details			Edge		Nodes
	radius	Group	ID 1	ID 2	ID 3	Q1	Q2	Q3	Q1	Q2	Q3	Q1	Q2	Q3	Nc	time ( s )	i	y	x	Nodes	T(Nodes) (s)	n	m	Tl	I	D	Pc		radius	Group	ID 1	ID 2	ID 3	Q1	Q2	Q3	Q1	Q2	Q3	Q1	Q2	Q3	Nc	time ( s )	i	y	x	Nodes	T(Nodes) (s)
	1	G1	P5	P6		-	1	1	2	3	2	-	-	-	14	330	7	17	3	27	521	14	24	0.916298	3.5	3.81972	0.9		1	G1	P5	P6		-	1	1	2	3	2	-	-	-	13	330	6	17	3	26	521
	1	G2	P4	P10		4	3	3	4	4	4	-	-	-	13	62	11	11	1	23	324	13	22	0.928198	3.25	3.50141	0.770833		1	G2	P4	P10		4	3	3	4	4	4	-	-	-	13	62	11	17	3	31	324
	1	G3	P2	P11		1	1	1	3	3	3	-	-	-	18	97	19	27	4	50	405	18	46	0.614659	4.5	7.32113	0.836207		1	G3	P2	P11		1	1	1	3	3	3	-	-	-	16	97	19	25	4	48	405
	1	G4	P3	P7		2	2	3	-	-	1	-	-	-	11	60	9	9	2	20	357	11	18	0.959931	2.75	2.86479	0.795455		1	G4	P3	P7		2	2	3	-	-	1	-	-	-	11	60	9	9	2	20	357
	1	G5	P9	P8		1	-	3	3	3	3	-	-	-	18	110	9	6	4	19	420	18	15	1.88496	4.5	2.38732	0.790698		1	G5	P9	P8		1	-	3	3	3	3	-	-	-	18	110	9	7	4	20	420
	1	G6	P13	P23		4	3	2	3	4	2	-	-	-	18	120	14	13	1	28	600	18	27	1.0472	4.5	4.29718	0.754386		1	G6	P13	P23		4	3	2	3	4	2	-	-	-	19	120	13	12	1	26	600
	1	G7	P14	P15		4	3	2	4	2	3	-	-	-	18	129	5	27	3	35	720	18	32	0.883573	4.5	5.09296	0.94898		1	G7	P14	P15		4	3	2	4	2	3	-	-	-	20	129	5	26	3	34	720
	1	G8	P12	P17	P22	4	3	3	4	2	2	3	2	1	14	323	5	14	1	20	115	14	19	1.15743	3.5	3.02394	0.901961		1	G8	P12	P17	P22	4	3	3	4	2	2	3	2	1	14	323	5	14	1	20	115
	1	G9	P16	P19		3	2	1	1	1	1	-	-	-	12	184	5	11	1	17	445	12	16	1.1781	3	2.54648	0.880952		1	G9	P16	P19		3	2	1	1	1	1	-	-	-	13	184	5	12	1	18	445
	1	G10	P18	P27		4	4	2	4	4	3	-	-	-	10	116	5	5	2	12	290	10	10	1.5708	2.5	1.59155	0.821429		1	G10	P18	P27		4	4	2	4	4	3	-	-	-	10	116	5	5	2	12	290
	1	G11	P20	P24		1	1	1	4	4	4	-	-	-	12	300	5	8	0	13	120	12	13	1.44997	3	2.06901	0.827586		1	G11	P20	P24		1	1	1	4	4	4	-	-	-	13	300	5	7	0	12	120
	1	G12	P21	P26		4	4	4	3	2	2	-	-	-	17	64	23	8	3	34	140	17	31	0.861404	4.25	4.9338	0.610169		1	G12	P21	P26		4	4	4	3	2	2	-	-	-	19	64	22	11	5	38	140
											total	Mean			14.5833	157.917	9.75	13	2.08333	24.8333	371.417	14.5833	22.75	1.12104	3.64583	3.62077	0.819888												total	Mean			14.9167	157.917	9.5	13.5	2.41667	25.4167	371.417
												Median			14	118	8	11	2	21.5	381	14	20.5	1.00356	3.5	3.26268	0.824507													Median			13.5	118	7.5	12	2.5	23	381
												min			10	60	5	5	0	12	115	10	10	0.614659	2.5	1.59155	0.610169													min			10	60	5	5	0	12	115
												max			18	330	23	27	4	50	720	18	46	1.88496	4.5	7.32113	0.94898													max			20	330	22	26	5	48	720
												Range			8	270	18	22	4	38	605	8	36	1.2703	2	5.72958	0.33881													Range			10	270	17	21	5	36	605
												CoV			0.428571	1.05297	0.84375	0.613636	1	0.511628	0.555118	0.428571	0.597561	0.336747	0.428571	0.597561	0.121264													CoV			0.388889	1.05297	0.866667	0.708333	0.9	0.532609	0.555118
											WS1	Mean			14.8	131.8	11	14	2.8	27.8	405.4	14.8	25	1.06081	3.7	3.97887	0.818638												WS1	Mean			14.2	131.8	10.8	15	3.2	29	405.4
												Median			14	97	9	11	3	23	405	14	22	0.928198	3.5	3.50141	0.795455													Median			13	97	9	17	3	26	405
												min			11	60	7	6	1	19	324	11	15	0.614659	2.75	2.38732	0.770833													min			11	60	6	7	2	20	324
												max			18	330	19	27	4	50	521	18	46	1.88496	4.5	7.32113	0.9													max			18	330	19	25	4	48	521
												Range			7	270	10	21	3	31	197	7	31	1.2703	1.75	4.9338	0.145614													Range			7	270	10	18	3	28	197
												CoV			0.357143	0.494845	0.222222	0.727273	0.666667	0.304348	0.155556	0.357143	0.272727	0.0470085	0.357143	0.272727	0.0572116													CoV			0.230769	0.494845	0.222222	0.470588	0.333333	0.423077	0.155556
											WS1	Mean			14.4286	176.571	8.85714	12.2857	1.57143	22.7143	347.143	14.4286	21.1429	1.16407	3.60714	3.36499	0.82078												WS1	Mean			15.4286	176.571	8.57143	12.4286	1.85714	22.8571	347.143
												Median			14	129	5	11	1	20	290	14	19	1.15743	3.5	3.02394	0.827586													Median			14	129	5	12	1	20	290
												min			10	64	5	5	0	12	115	10	10	0.861404	2.5	1.59155	0.610169													min			10	64	5	5	0	12	115
												max			18	323	23	27	3	35	720	18	32	1.5708	4.5	5.09296	0.94898													max			20	323	22	26	5	38	720
												Range			8	259	18	22	3	23	605	8	22	0.709392	2	3.50141	0.33881													Range			10	259	17	21	5	26	605
												CoV			0.392857	0.96124	0.9	0.5	1.5	0.8	1.35345	0.392857	0.763158	0.301225	0.392857	0.763158	0.125122													CoV			0.428571	0.96124	0.8	0.333333	1.5	0.75	1.35345
[truncated: 6 more columns]

## Sheet: Circle 3
	A: Data recorded on the sheets					Participant experience									Raw data									Fracture statistics					B: Data recorded on the sheets					Participant experience									Raw data
						ID 1 details			ID 2 details			ID 3 details			Edge		Nodes																	ID 1 details			ID 2 details			ID 3 details			Edge		Nodes
	radius	Group	ID 1	ID 2	ID 3	Q1	Q2	Q3	Q1	Q2	Q3	Q1	Q2	Q3	Nc	time ( s )	i	y	x	Nodes	T(Nodes) (s)	n	m	Tl	I	D	Pc		radius	Group	ID 1	ID 2	ID 3	Q1	Q2	Q3	Q1	Q2	Q3	Q1	Q2	Q3	Nc	time ( s )	i	y	x	Nodes	T(Nodes) (s)
	1	G1	P5	P6		-	1	1	2	3	2	-	-	-	22	90	20	24	11	55	521	22	44	0.785398	5.5	7.00282	0.852941		1	G1	P5	P6		-	1	1	2	3	2	-	-	-	22	90	18	25	11	54	521
	1	G2	P4	P10		4	3	3	4	4	4	-	-	-	18	82	4	19	6	29	208	18	23	1.22932	4.5	3.66056	0.952941		1	G2	P4	P10		4	3	3	4	4	4	-	-	-	18	82	4	20	6	30	208
	1	G4	P3	P7		2	2	3	-	-	1	-	-	-	18	73	5	23	5	33	332	18	28	1.0098	4.5	4.45634	0.946809		1	G4	P3	P7		2	2	3	-	-	1	-	-	-	18	73	5	24	4	33	332
	1	G5	P9	P8		1	-	3	3	3	3	-	-	-	21	55	6	23	5	34	312	21	29	1.13747	5.25	4.61549	0.936842		1	G5	P9	P8		1	-	3	3	3	3	-	-	-	21	55	6	24	5	35	312
	1	G6	P13	P23		4	3	2	3	4	2	-	-	-	23	60	11	17	6	34	360	23	28	1.2903	5.75	4.45634	0.872093		1	G6	P13	P23		4	3	2	3	4	2	-	-	-	21	60	11	18	6	35	360
	1	G7	P14	P15		4	3	2	4	2	3	-	-	-	18	129	3	22	3	28	600	18	25	1.13097	4.5	3.97887	0.962963		1	G7	P14	P15		4	3	2	4	2	3	-	-	-	21	129	3	22	3	28	600
	1	G8	P12	P17	P22	4	3	3	4	2	2	3	2	1	14	713	7	18	4	29	143	14	25	0.879646	3.5	3.97887	0.909091		1	G8	P12	P17	P22	4	3	3	4	2	2	3	2	1	14	713	7	18	4	29	143
	1	G9	P16	P19		3	2	1	1	1	1	-	-	-	16	389	16	22	3	41	168	16	38	0.661388	4	6.04789	0.829787		1	G9	P16	P19		3	2	1	1	1	1	-	-	-	20	389	16	23	3	42	168
	1	G10	P18	P27		4	4	2	4	4	3	-	-	-	16	113	4	13	4	21	465	16	17	1.4784	4	2.70563	0.932203		1	G10	P18	P27		4	4	2	4	4	3	-	-	-	17	113	5	13	5	23	465
	1	G11	P20	P24		1	1	1	4	4	4	-	-	-	18	240	2	11	10	23	360	18	13	2.17495	4.5	2.06901	0.973333		1	G11	P20	P24		1	1	1	4	4	4	-	-	-	18	240	5	12	10	27	360
	1	G12	P21	P26		4	4	4	3	2	2	-	-	-	16	52	54	22	4	80	205	16	76	0.330694	4	12.0958	0.602941		1	G12	P21	P26		4	4	4	3	2	2	-	-	-	17	52	50	26	4	80	205
											total	Mean			18.1818	181.455	12	19.4545	5.54545	37	334	18.1818	31.4545	1.10076	4.54545	5.00615	0.888359												total	Mean			18.8182	181.455	11.8182	20.4545	5.54545	37.8182	334
												Median			18	90	6	22	5	33	332	18	28	1.13097	4.5	4.45634	0.932203													Median			18	90	6	22	5	33	332
												min			14	52	2	11	3	21	143	14	13	0.330694	3.5	2.06901	0.602941													min			14	52	3	12	3	23	143
												max			23	713	54	24	11	80	600	23	76	2.17495	5.75	12.0958	0.973333													max			22	713	50	26	11	80	600
												Range			9	661	52	13	8	59	457	9	63	1.84425	2.25	10.0268	0.370392													Range			8	661	47	14	8	57	457
												CoV			0.194444	1.31111	1.58333	0.227273	0.4	0.272727	0.620482	0.194444	0.339286	0.377804	0.194444	0.339286	0.093711													CoV			0.194444	1.31111	1.41667	0.272727	0.4	0.30303	0.620482
											WS1	Mean			19.75	75	8.75	22.25	6.75	37.75	343.25	19.75	31	1.0405	4.9375	4.9338	0.922383												WS1	Mean			19.75	75	8.25	23.25	6.5	38	343.25
												Median			19.5	77.5	5.5	23	5.5	33.5	322	19.5	28.5	1.07364	4.875	4.53592	0.941825													Median			19.5	77.5	5.5	24	5.5	34	322
												min			18	55	4	19	5	29	208	18	23	0.785398	4.5	3.66056	0.852941													min			18	55	4	20	4	30	208
												max			22	90	20	24	11	55	521	22	44	1.22932	5.5	7.00282	0.952941													max			22	90	18	25	11	54	521
												Range			4	35	16	7	6	26	313	4	21	0.443921	1	3.34225	0.1													Range			4	35	14	7	7	24	313
												CoV			0.166667	0.2	0.863636	0.0543478	0.409091	0.216418	0.289596	0.166667	0.210526	0.192558	0.166667	0.210526	0.0344807													CoV			0.166667	0.2	0.772727	0.0520833	0.454545	0.220588	0.289596
											WS1	Mean			17.2857	242.286	13.8571	17.8571	4.85714	36.5714	328.714	17.2857	31.7143	1.13519	4.32143	5.04749	0.868916												WS1	Mean			18.2857	242.286	13.8571	18.8571	5	37.7143	328.714
												Median			16	129	7	18	4	29	360	16	25	1.13097	4	3.97887	0.909091													Median			18	129	7	18	4	29	360
												min			14	52	2	11	3	21	143	14	13	0.330694	3.5	2.06901	0.602941													min			14	52	3	12	3	23	143
												max			23	713	54	22	10	80	600	23	76	2.17495	5.75	12.0958	0.973333													max			21	713	50	26	10	80	600
												Range			9	661	52	11	7	59	457	9	63	1.84425	2.25	10.0268	0.370392													Range			7	661	47	14	7	57	457
												CoV			0.125	1.76744	1.42857	0.388889	0.375	0.413793	0.627778	0.125	0.48	0.542745	0.125	0.48	0.106307													CoV			0.194444	1.76744	1.21429	0.388889	0.5	0.37931	0.627778
[truncated: 6 more columns]
