# Supplementary material for: How do we see fractures? Quantifying subjective bias in fracture data collection
Source: Copernicus journal article supplement (doi:10.5194/se-10-487-2019), 2019-04-11
Supplement: Supplementary file 6 [file S8_Workshop window sampling data_review edits.xlsx]

## Sheet: Summary
		Description of sheets
	Sheet name	Description
	Circle 8	All worksheets contain: A) raw exported trace lengths from ArcGIS; B) scaled trace lengths; C) summary of raw data (# of fractures, min/max trace lengths (tl)) and derived fracture statistics (mean trace length, Fracture Intensity and Fracture Density); and D) data for tl histograms, cumulative frequency charts and normalised cumulative frequency charts for all participants.
	Circle 5
	Circle 1
	Circle 4
	Circle 3
	Summary of data
	Scanline #	radius	# Participants	i/g	# of fractures			trace length (m)			Intensity (f/m)			Density (f/A)
					min	max	mean	min	max	mean	min	max	mean	min	max	mean
	Circle 8	0.5 m	20	i	18	54	34.4	0.00566855	0.983541	0.273348	7.57267	13.046	11.1694	22.9183	68.7549	43.7994
	Circle 5	1.0 m	20	i	13	56	24.9	0.0194074	1.05061	0.328607	1.87934	3.30664	2.402	4.13803	17.8254	7.92592
	Circle 1	1.0 m	20	i	9	40	23.55	0.00901505	1.02975	0.367967	2.07378	2.7693	2.46672	2.86479	12.7324	7.4962
	Circle 4	1.0 m	7	g	11	29	19.8571	0.0230671	1.9499	0.691919	3.1481	4.60844	4.00847	3.50141	9.23099	6.32072
	Circle 3	1.0 m	7	g	18	50	27.4286	0.0417968	2.00563	0.612705	3.91898	6.01532	4.9106	5.72958	15.9155	8.73079
	References
	Zeeb, C., Gomez-Rivas, E., Bons, P.D. and Blum, P., 2013. Evaluation of sampling methods for fracture netowrk characterization using outcrops. AAPG bulletin, 97(9), pp. 1545-1566

## Sheet: Circle 8
	A: Exported trace length from ArcGIS																					B: Trace length scaled to size of scanline																					C: Summary fracture statistics by participant
	p1	p3	p11	p12	p13	p14	p15	p16	p17	p18	p19	p20	p21	p22	p23	p24	p25	p26	p27	p29		p1	p3	p11	p12	p13	p14	p15	p16	p17	p18	p19	p20	p21	p22	p23	p24	p25	p26	p27	p29		Attribute/statistic	p1	p3	p11	p12	p13	p14
	0.283251	0.101472	0.0721	0.0898093	0.121663	0.110911	0.0827902	0.0838626	0.153845	0.195073	0.162858	0.180887	0.199626	0.305644	0.0622025	0.770961	0.176182	0.0789364	0.0416638	0.0916172		0.0385375	0.0138058	0.00980952	0.012219	0.0165528	0.0150899	0.011264	0.0114099	0.0209313	0.0265405	0.0221576	0.0246105	0.02716	0.0415842	0.00846292	0.104893	0.0239704	0.0107396	0.00566855	0.0124649		N	29	54	54	44	48	43
	0.355018	0.104875	0.0799383	0.107624	0.157367	0.112436	0.110321	0.172559	0.191617	0.209115	0.210229	0.424202	0.227454	0.577045	0.0900741	0.779729	0.185248	0.143334	0.166126	0.127169		0.0483018	0.0142688	0.010876	0.0146427	0.0214105	0.0152974	0.0150097	0.0234774	0.0260703	0.028451	0.0286026	0.0577145	0.0309462	0.0785095	0.012255	0.106086	0.0252039	0.0195012	0.0226021	0.0173019		minimum tl	0.0385375	0.0138058	0.00980952	0.012219	0.0165528	0.0150899
	0.362103	0.113819	0.108181	0.119859	0.254705	0.155781	0.172995	0.198231	0.197317	0.215094	0.381832	0.629893	0.235801	0.581862	0.111322	0.791503	0.202348	0.168298	0.201259	0.15143		0.0492658	0.0154856	0.0147185	0.0163074	0.0346538	0.0211947	0.0235367	0.0269702	0.0268459	0.0292645	0.0519499	0.0856997	0.0320818	0.0791649	0.0151459	0.107687	0.0275303	0.0228977	0.0273822	0.0206028		maximum tl	0.975129	0.972655	0.854938	0.979048	0.977679	0.980503
	0.384586	0.121079	0.110559	0.129879	0.280549	0.158374	0.266521	0.248961	0.299203	0.222701	0.395481	0.678695	0.271392	0.613798	0.382007	0.968398	0.221526	0.175478	0.257876	0.229971		0.0523247	0.0164734	0.015042	0.0176706	0.03817	0.0215474	0.0362613	0.0338723	0.0407079	0.0302995	0.0538069	0.0923394	0.0369241	0.0835099	0.0519738	0.131755	0.0301396	0.0238746	0.0350852	0.0312885		range	0.936591	0.958849	0.845129	0.966829	0.961126	0.965413
	0.401104	0.126775	0.117746	0.134028	0.283762	0.171941	0.272	0.318692	0.321167	0.244447	0.433774	0.925199	0.467858	0.627845	0.448456	0.996695	0.238601	0.20222	0.399864	0.327679		0.054572	0.0172483	0.0160198	0.0182351	0.038607	0.0233934	0.0370068	0.0433594	0.0436962	0.033258	0.0590168	0.125877	0.0636542	0.0854211	0.0610144	0.135605	0.0324627	0.0275129	0.0544032	0.0445821		Median	0.21853	0.0663255	0.0615743	0.085262	0.0903977	0.09563
	0.439795	0.136729	0.129303	0.135502	0.287947	0.200993	0.2843	0.360835	0.366617	0.254466	0.44314	1.04748	0.568004	0.636098	0.458005	1.26571	0.253994	0.213412	0.430016	0.41592		0.0598361	0.0186026	0.0175923	0.0184356	0.0391765	0.027346	0.0386802	0.0490932	0.0498798	0.0346212	0.0602912	0.142514	0.0772795	0.086544	0.0623136	0.172205	0.0345571	0.0290356	0.0585056	0.0565877		TL	0.321948	0.180885	0.164782	0.204427	0.213465	0.213811
	0.479703	0.139899	0.134105	0.137921	0.291403	0.23313	0.287679	0.438149	0.398328	0.415202	0.512022	1.35254	0.571634	0.844171	0.592127	1.4306	0.365625	0.223556	0.432835	0.50174		0.0652657	0.0190338	0.0182455	0.0187648	0.0396466	0.0317184	0.03914	0.0596122	0.0541942	0.0564901	0.0696629	0.184019	0.0777733	0.114853	0.0805614	0.194639	0.0497449	0.0304158	0.0588891	0.0682639		Total trace length	9.33649	9.76778	8.89824	8.99478	10.2463	9.19388
	0.517344	0.141974	0.149245	0.141792	0.301885	0.273682	0.29135	0.569328	0.474425	0.446389	0.52282	1.37628	0.592787	0.874964	0.618532	1.47217	0.400816	0.226359	0.545319	0.563105		0.0703869	0.0193162	0.0203055	0.0192914	0.0410728	0.0372357	0.0396395	0.0774597	0.0645476	0.0607332	0.071132	0.187249	0.0806514	0.119043	0.084154	0.200295	0.0545328	0.0307972	0.074193	0.0766129		Circle Area	0.785398	0.785398	0.785398	0.785398	0.785398	0.785398
	0.594077	0.144646	0.170426	0.195499	0.327417	0.294802	0.332713	0.659709	0.50505	0.463691	0.595313	1.58525	0.600315	1.03629	0.80349	2.45213	0.40797	0.245537	0.565635	0.603156		0.0808268	0.0196797	0.0231873	0.0265985	0.0445465	0.0401092	0.0452671	0.0897563	0.0687143	0.0630872	0.0809949	0.21568	0.0816756	0.140992	0.109318	0.333624	0.0555061	0.0334064	0.0769571	0.0820621		I	11.8876	12.4367	11.3296	11.4525	13.046	11.706
	0.97759	0.152649	0.173967	0.221001	0.348728	0.301159	0.460017	0.83015	0.507881	0.511436	0.799484	2.54543	0.615858	1.6074	0.894707	3.24043	0.412301	0.251394	0.583512	0.628148		0.133005	0.0207686	0.023669	0.0300682	0.047446	0.040974	0.0625874	0.112946	0.0690995	0.0695831	0.108773	0.346317	0.0837902	0.218694	0.121729	0.440874	0.0560953	0.0342032	0.0793894	0.0854623		D	36.9239	68.7549	68.7549	56.0225	61.1155	54.7493
	1.05731	0.171826	0.187511	0.240348	0.350357	0.304341	0.48229	0.862104	0.56332	0.542493	0.817121	2.89218	0.717964	3.18183	0.923826	3.62426	0.418193	0.273472	0.611959	0.740043		0.143851	0.0233777	0.0255117	0.0327004	0.0476677	0.0414069	0.0656177	0.117293	0.0766421	0.0738085	0.111173	0.393494	0.0976822	0.432902	0.125691	0.493096	0.0568969	0.0372071	0.0832597	0.100686
	1.19709	0.192736	0.1921	0.245416	0.350439	0.335358	0.576989	0.906696	0.598383	0.584391	1.01227	3.16068	0.754763	3.88307	0.955235	3.8752	0.450389	0.318841	0.621182	0.769401		0.162869	0.0262225	0.026136	0.0333899	0.0476788	0.0456269	0.0785019	0.12336	0.0814126	0.079509	0.137724	0.430024	0.102689	0.528309	0.129964	0.527238	0.0612774	0.0433797	0.0845146	0.10468		References
	1.43994	0.204002	0.198911	0.323695	0.384905	0.396304	0.620683	0.999536	0.945644	0.666869	1.02687	3.39586	0.774726	3.93693	0.975357	3.94099	0.491625	0.367091	0.750722	0.980845		0.195911	0.0277554	0.0270628	0.0440401	0.052368	0.0539189	0.0844467	0.135991	0.128659	0.0907305	0.13971	0.462022	0.105405	0.535636	0.132702	0.536189	0.0668877	0.0499443	0.102139	0.133448		Zeeb, C., Gomez-Rivas, E., Bons, P.D. and Blum, P., 2013. Evaluation of sampling methods for fracture netowrk characterization using outcrops. AAPG bulletin, 97(9), pp. 1545-1566
	1.51673	0.233773	0.199848	0.325823	0.412083	0.412805	0.789184	1.1209	0.978064	0.765902	1.07887	3.89811	0.995096	4.30816	1.14943	4.40889	0.513523	0.467966	0.988105	1.03321		0.206358	0.0318059	0.0271902	0.0443297	0.0560657	0.0561639	0.107372	0.152504	0.13307	0.104204	0.146785	0.530355	0.135387	0.586144	0.156386	0.59985	0.0698671	0.0636689	0.134436	0.140573
	1.6062	0.246649	0.223174	0.37819	0.417981	0.473697	0.812116	1.4094	0.987079	0.814421	1.30105	4.74136	1.08386	4.38889	1.2958	4.46941	0.588855	0.541374	1.00391	1.31881		0.21853	0.0335576	0.0303638	0.0514544	0.0568682	0.0644486	0.110492	0.191756	0.134297	0.110806	0.177013	0.645083	0.147463	0.597127	0.176299	0.608083	0.0801164	0.0736563	0.136586	0.17943
	1.6085	0.277317	0.228211	0.417719	0.423124	0.478555	0.827246	1.61711	1.48613	0.974828	1.66406	5.22347	1.10661	4.50978	1.47486	5.18397	0.690139	0.594325	1.01612	1.34136		0.218843	0.0377302	0.0310492	0.0568326	0.0575678	0.0651095	0.11255	0.220014	0.202195	0.13263	0.226403	0.710676	0.150559	0.613576	0.200661	0.705302	0.0938965	0.0808605	0.138248	0.182498
	1.99394	0.277483	0.236171	0.486493	0.423795	0.48129	0.991742	1.6766	1.61783	1.03856	1.68211	6.81356	1.12964	4.63871	1.53745	6.13795	0.807662	0.634795	1.60263	1.37722		0.271285	0.0377528	0.0321321	0.0661896	0.0576592	0.0654817	0.134931	0.228109	0.220113	0.141301	0.228859	0.927015	0.153693	0.631117	0.209177	0.835095	0.109886	0.0863666	0.218045	0.187377
	2.88729	0.29539	0.253263	0.48762	0.429233	0.501392	1.00856	3.10378	2.43724	1.30508	1.949	7.16015	1.37523	6.30618	1.74989	6.94517	0.934484	0.666164	2.83168	1.38131		0.392828	0.0401891	0.0344576	0.0663428	0.0583991	0.0682166	0.13722	0.422283	0.331597	0.177562	0.265171	0.97417	0.187106	0.857983	0.238081	0.944921	0.127141	0.0906346	0.385262	0.187933
	3.00518	0.309998	0.268833	0.517008	0.445714	0.545873	1.00896	3.21751	3.27701	1.60387	2.96496		1.6173	6.75504	1.81857	7.19715	0.961787	0.744269	2.98044	1.59185		0.408868	0.0421767	0.0365759	0.0703413	0.0606414	0.0742684	0.137273	0.437756	0.445852	0.218213	0.403396		0.22004	0.919053	0.247425	0.979205	0.130855	0.101261	0.405502	0.216579
	3.2572	0.334928	0.290938	0.567617	0.452793	0.584446	1.02079	3.5131	3.45164	2.16336	3.03581		1.69158	7.14457	2.90788		0.973952	0.852245	3.24668	1.62914		0.443156	0.0455685	0.0395834	0.0772268	0.0616045	0.0795165	0.138883	0.477973	0.469611	0.294334	0.413036		0.230147	0.97205	0.39563		0.13251	0.115952	0.441726	0.221652
	3.90157	0.343853	0.298746	0.598181	0.488887	0.592271	1.34928	3.87887	3.91878	3.1261	3.1672		2.55688		2.96581		1.00122	1.02992	3.42968	1.7172		0.530825	0.0467827	0.0406458	0.0813852	0.0665152	0.0805811	0.183575	0.527737	0.533168	0.425319	0.430911		0.347874		0.403512		0.136221	0.140125	0.466624	0.233633
	3.91232	0.354193	0.333363	0.614171	0.493643	0.702881	1.50267	3.87914	4.14071	3.27472	3.88246		2.68036		3.86401		1.00402	1.04982	3.91627	1.94536		0.532288	0.0481895	0.0453556	0.0835607	0.0671624	0.09563	0.204445	0.527774	0.563362	0.44554	0.528226		0.364675		0.525716		0.136602	0.142833	0.532825	0.264675
	4.16957	0.365589	0.346846	0.63918	0.550059	0.843138	1.58028	4.21512	4.43117	3.90687	3.89833		3.35709		3.8716		1.01285	1.05555	4.33499	2.39412		0.567289	0.04974	0.0471899	0.0869633	0.074838	0.114713	0.215004	0.573485	0.602881	0.531547	0.530385		0.456747		0.526748		0.137802	0.143612	0.589794	0.325731
	4.20085	0.371358	0.398681	0.691292	0.573582	0.884372	1.58218	4.44917	4.49609	4.1548	4.1251		3.47477		4.16986		1.06033	1.07389	4.43212	2.78519		0.571544	0.0505249	0.0542423	0.0940533	0.0780383	0.120323	0.215263	0.60533	0.611712	0.565279	0.561238		0.472757		0.567328		0.144263	0.146108	0.60301	0.378937
	4.53899	0.398336	0.41332	0.824237	0.755265	0.893436	1.58606	4.53469	5.24756	4.45629	4.45373		3.82555		4.43211		1.13016	1.07632	4.57035	2.87335		0.617549	0.0541953	0.056234	0.112141	0.102757	0.121556	0.215791	0.616964	0.713953	0.606298	0.605949		0.520483		0.603008		0.153763	0.146437	0.621816	0.390931
	4.77377	0.401855	0.440553	0.892293	0.762757	0.983014	1.87938	5.2943	6.27389	4.47657	4.56597		4.03089		5.16192		1.19755	1.07815	5.40042	2.91954		0.649493	0.0546742	0.0599392	0.1214	0.103776	0.133743	0.255698	0.720313	0.85359	0.609057	0.62122		0.548421		0.702302		0.162932	0.146687	0.734751	0.397217
	5.23269	0.417439	0.449043	0.988072	0.787169	1.01529	2.88791	6.66258	6.73713	4.81173	4.87679		4.21551				1.25921	1.13878	6.32555	2.97107		0.71193	0.0567944	0.0610942	0.134432	0.107098	0.138135	0.392912	0.906474	0.916617	0.654657	0.663509		0.573539				0.17132	0.154936	0.860619	0.404227
	6.36227	0.557546	0.4561	1.00449	0.91782	1.06456	3.09398	7.22902	7.21005	5.26244	5.34142		4.49493				1.30133	1.17279	6.79496	3.16057		0.865614	0.0758566	0.0620545	0.136665	0.124873	0.144838	0.420949	0.983541	0.98096	0.715978	0.726724		0.611556				0.177052	0.159564	0.924485	0.43001
	7.1672	0.592618	0.456388	1.06228	1.03383	1.17221	3.3336			6.15273	6.42701		4.73913				1.64474	1.37959	7.19805	3.20929		0.975129	0.0806283	0.0620936	0.144528	0.140657	0.159484	0.453551			0.837106	0.874423		0.644779				0.223774	0.1877	0.979326	0.436638
		0.603187	0.489501	1.14468	1.09105	1.26592	3.39269			6.16003			7.14107				1.79881	1.3873		3.87782			0.0820663	0.0665988	0.155739	0.148443	0.172234	0.46159			0.838099			0.971573				0.244736	0.188748		0.527595
		0.785649	0.592759	1.20108	1.10317	1.40477	3.87596			7.22697							3.01207	1.64781		3.90488			0.106891	0.0806475	0.163413	0.150091	0.191126	0.527342			0.983262							0.409805	0.224191		0.531277
		0.905571	0.634799	1.54566	1.20324	1.59218	3.9009										3.16824	1.89734		4.24584			0.123207	0.0863672	0.210294	0.163707	0.216623	0.530734										0.431053	0.258141		0.577666
		0.933819	0.827513	1.60601	1.20798	2.90296	4.09455										3.79126	2.28289		4.44326			0.12705	0.112587	0.218505	0.164351	0.394961	0.557082										0.515817	0.310598		0.604525
		0.943077	1.03811	2.75761	1.22709	3.12289	4.45564										3.87267	3.09924		5.2811			0.12831	0.14124	0.375184	0.166951	0.424884	0.60621										0.526894	0.421665		0.718516
		0.943988	1.08581	2.85116	1.29675	3.25007	4.73676										3.90224	3.64478		6.22264			0.128434	0.147729	0.387913	0.176429	0.442186	0.644458										0.530917	0.495888		0.846617
		1.03872	1.14204	3.18907	1.50253	3.45835	5.33826										4.48215	3.90342		7.03701			0.141323	0.15538	0.433887	0.204426	0.470524	0.726293										0.609816	0.531078		0.957417
		1.1074	1.1665	3.33565	1.57706	3.88135	6.88084										4.97119	3.91112					0.150667	0.158707	0.453829	0.214566	0.528074	0.936169										0.676352	0.532125
		1.14557	1.22281	3.92139	2.4288	3.91734	7.20792										5.11742	4.44168					0.15586	0.166368	0.533522	0.330448	0.532971	0.980669										0.696247	0.60431
		1.18204	1.24587	3.94733	3.15496	4.39748											5.17692	4.45063					0.160822	0.169507	0.537052	0.429246	0.598297											0.704343	0.605528
		1.26704	1.25208	4.20148	3.88365	4.4852											6.11821	4.76005					0.172386	0.170351	0.57163	0.528388	0.610231											0.83241	0.647626
		1.33599	1.36418	4.47605	3.9357	5.32123											7.14967	5.14761					0.181768	0.185603	0.608986	0.53547	0.723977											0.972744	0.700355
		1.60697	1.50356	5.30772	4.26579	6.69013												5.368					0.218635	0.204566	0.722139	0.58038	0.910221												0.73034
		2.48136	1.65245	6.71372	4.42107	7.2067												7.02263					0.337599	0.224823	0.913431	0.601505	0.980503												0.95546
		2.89534	2.08434	7.196	4.63478																		0.393924	0.283584	0.979048	0.630583
		3.01052	2.69682		5.2626																		0.409595	0.366914		0.716
		3.09889	2.72618		6.26228																		0.421618	0.370909		0.852011
		3.1119	2.96409		6.55704																		0.423388	0.403278		0.892115
		3.89189	3.62673		7.18594																		0.529509	0.493433		0.977679
		3.89562	3.85607																				0.530017	0.524635
		4.19771	3.89947																				0.571117	0.53054
		4.51027	4.29242																				0.613642	0.584003
		5.33924	4.47163																				0.726427	0.608385
		6.78155	6.16499																				0.92266	0.838774
		7.14902	6.2838																				0.972655	0.854938
[truncated: 40 more columns]

## Sheet: Circle 5
	A: Exported fracture traces from ArcGIS																					B: Corrected fracture trace lengths																					C: Summary fracture statistics by participant
	p1	p3	p11	p12	p13	p14	p15	p16	p17	p18	p19	p20	p21	p22	p23	p24	p25	p26	p27	p29		p1	p3	p11	p12	p13	p14	p15	p16	p17	p18	p19	p20	p21	p22	p23	p24	p25	p26	p27	p29		Attribute/statistic	p1	p3	p11	p12	p13	p14
	0.19714	0.193569	0.248827	1.83438	2.16665	1.56924	3.35929	1.95599	0.730875	1.69817	0.762104	1.23682	3.06762	1.8596	0.988679	1.97152	1.92634	1.48623	2.10783	0.978562		0.0227775	0.022365	0.0287495	0.211945	0.250335	0.18131	0.388133	0.225995	0.0844455	0.196207	0.0880536	0.142902	0.354433	0.214859	0.114232	0.22779	0.22257	0.171719	0.243539	0.113063		N	29	36	34	25	56	30
	0.32419	0.208626	0.344674	2.33611	0.504536	2.9287	6.87592	1.01226	7.90955	4.84965	7.96198	0.534172	2.45889	1.08443	2.15606	1.87827	2.386	7.30966	1.23849	2.4807		0.037457	0.0241046	0.0398237	0.269915	0.0582942	0.338382	0.794445	0.116957	0.913871	0.56033	0.919928	0.0617183	0.284101	0.125295	0.249112	0.217016	0.275679	0.844559	0.143095	0.286621		minimum tl	0.0227775	0.022365	0.0287495	0.0247421	0.0194074	0.0255787
	0.324862	0.225983	0.3907	2.891	2.65578	0.86028	1.11769	2.46062	1.54435	1.31052	0.964795	8.32111	4.33722	0.454001	0.605151	7.72089	2.47749	3.92255	1.86564	1.61312		0.0375346	0.0261101	0.0451415	0.334026	0.306849	0.0993969	0.129138	0.284301	0.178435	0.151417	0.111473	0.961422	0.501123	0.0524554	0.0699192	0.892073	0.286249	0.453212	0.215556	0.18638		maximum tl	0.897884	1.0231	0.891442	0.983397	0.886097	0.683272
	0.342516	0.231059	0.396202	6.14864	0.787824	0.603546	0.461648	1.3975	4.86224	0.364255	1.49511	1.61506	3.22195	7.64045	3.12495	3.36415	7.71875	2.95594	2.55691	0.235828		0.0395743	0.0266966	0.0457772	0.710415	0.0910253	0.0697338	0.0533389	0.161467	0.561784	0.0420861	0.172746	0.186604	0.372265	0.882778	0.361057	0.388694	0.891825	0.34153	0.295426	0.0272477		range	0.875106	1.00074	0.862693	0.958655	0.86669	0.657694
	0.500761	0.238323	0.437181	1.47877	0.330757	1.03842	4.75726	1.3946	0.848454	1.33282	2.56263	4.78957	0.669669	2.28976	1.7189	6.91711	0.442729	1.97909	1.99817	1.1552		0.057858	0.0275358	0.0505119	0.170857	0.0382157	0.119979	0.549654	0.161132	0.0980305	0.153995	0.296086	0.553388	0.0773737	0.264559	0.198602	0.799204	0.0511529	0.228665	0.230869	0.133472		median	0.163785	0.138434	0.164145	0.211945	0.104624	0.194173
	0.746129	0.299842	0.481022	6.09899	1.79762	1.89336	2.00522	3.47158	8.80989	2.0508	1.91857	8.48765	0.929964	0.647184	2.46268	4.34706	6.40642	1.83929	7.68137	0.459413		0.0862078	0.0346438	0.0555773	0.704678	0.207697	0.21876	0.231684	0.401106	1.0179	0.23695	0.221672	0.980665	0.107448	0.0747758	0.284539	0.50226	0.740198	0.212512	0.887507	0.0530806		TL	0.249222	0.226296	0.249179	0.325549	0.185502	0.239598
	0.766908	0.30205	0.53514	3.37305	1.1966	3.5921	0.935948	0.663427	8.04642	2.75884	0.837685	0.425586	1.15189	3.10097	6.34251	4.01066	1.40809	3.20276	6.4042	7.23653		0.0886087	0.0348989	0.0618301	0.389723	0.138256	0.415031	0.10814	0.0766524	0.929685	0.318757	0.0967862	0.0491723	0.13309	0.358287	0.732815	0.463393	0.162691	0.370047	0.739942	0.83611		Total trace length	7.22744	8.14664	8.47208	8.13874	10.3881	7.18793
	0.907742	0.305093	0.547781	0.764104	0.402677	0.638561	3.31813	4.54614	4.07133	1.11295	2.21181	1.22693	0.95144	6.51566	4.47449	4.34767	6.12199	7.60755	3.8624	1.21347		0.104881	0.0352505	0.0632907	0.0882847	0.0465254	0.0737794	0.383377	0.525262	0.470402	0.12859	0.255553	0.141759	0.10993	0.752821	0.516984	0.50233	0.707336	0.878977	0.446262	0.140205		Circle Area	3.14159	3.14159	3.14159	3.14159	3.14159	3.14159
	0.939761	0.467608	0.713947	0.826254	0.577681	2.99755	1.9447	1.40032	4.81025	1.84074	7.63747	1.05055	1.21052	1.28308	2.0257	3.65815	3.70721	1.57615	6.44154	1.78863		0.10858	0.0540275	0.0824895	0.0954656	0.0667453	0.346338	0.22469	0.161793	0.555778	0.21268	0.882435	0.121381	0.139863	0.148247	0.23405	0.422663	0.428332	0.182109	0.744257	0.206659		I	2.30057	2.59316	2.69675	2.59064	3.30664	2.28799
	0.992316	0.536436	0.854152	8.5113	1.73599	0.597608	1.22878	4.51732	0.48836	6.46214	1.87171	3.52049	3.4974	1.15622	4.43279	7.64188	0.933229	6.88824	4.43218	1.51548		0.114652	0.0619799	0.0986889	0.983397	0.200576	0.0690477	0.141973	0.521932	0.0564252	0.746636	0.216258	0.406758	0.40409	0.133589	0.512165	0.882944	0.107825	0.795868	0.512095	0.175099		D	9.23099	11.4592	10.8225	7.95775	17.8254	9.5493
	1.01877	0.580939	0.86052	6.02446	0.261983	0.330047	0.7314	1.85496	2.93527	1.92302	2.50736	1.64738	1.77292	4.57545	1.38223	1.07718	2.12485	0.815048	7.90061	1.66987		0.117709	0.0671218	0.0994246	0.696067	0.0302695	0.0381337	0.084506	0.214323	0.339142	0.222186	0.2897	0.190339	0.204844	0.528648	0.159703	0.124457	0.245506	0.0941708	0.912837	0.192938
	1.09399	0.662447	0.966284	0.588503	0.921936	4.49173	0.627132	2.19511	0.998091	8.78236	3.70324	1.05656	4.53846	1.38309	3.97812	2.517	1.21582	1.78491	1.00084	6.50705		0.1264	0.0765392	0.111645	0.0679958	0.106521	0.518975	0.0724589	0.253624	0.11532	1.01472	0.427872	0.122075	0.524374	0.159802	0.459633	0.290815	0.140476	0.206229	0.115638	0.751826		References
	1.19162	0.675083	0.971959	1.22658	0.815722	0.94754	7.03044	2.58606	1.90205	5.21742	4.23276	1.02575	1.61958	4.51973	3.39269	2.56012	1.46649	6.50831	1.55767	3.83242		0.13768	0.0779992	0.1123	0.141719	0.0942487	0.109479	0.812298	0.298794	0.219763	0.602821	0.489054	0.118516	0.187126	0.52221	0.391992	0.295797	0.169439	0.751972	0.179973	0.442799		Zeeb, C., Gomez-Rivas, E., Bons, P.D. and Blum, P., 2013. Evaluation of sampling methods for fracture netowrk characterization using outcrops. AAPG bulletin, 97(9), pp. 1545-1566
	1.40125	0.676237	1.09929	0.789093	7.66917	0.265188	0.545115	0.562891	2.40431	4.26145	8.97461	6.48802	0.723189	2.23803	2.07995		2.6863	2.0346	3.40909	3.08326		0.161901	0.0781326	0.127012	0.0911719	0.886097	0.0306398	0.0629826	0.0650365	0.277794	0.492369	1.03693	0.749627	0.0835574	0.258582	0.240318		0.310376	0.235078	0.393886	0.356241
	1.41756	0.81667	1.11221	1.55533	2.42696	1.12251	1.58277	5.87286	0.786817	3.71772	8.74983	1.23473	1.96561	1.93047	7.69187		1.63861	2.37262	1.16441	1.34444		0.163785	0.0943582	0.128505	0.179703	0.280411	0.129695	0.182873	0.678551	0.090909	0.429546	1.01096	0.142661	0.227106	0.223047	0.88872		0.189326	0.274132	0.134537	0.155337
	1.58561	0.91504	1.29954	8.31982	3.19028	0.753822	1.84994	1.06026	2.22303	1.85343	1.03917	1.83901	0.821526	6.49196	6.53519		6.68763	4.30582	4.06392	4.73149		0.183202	0.105724	0.150149	0.961273	0.368605	0.0870967	0.213743	0.122502	0.256849	0.214146	0.120066	0.212479	0.0949193	0.750082	0.755077		0.77269	0.497496	0.469546	0.546678
	1.69012	1.03156	1.38492	0.214143	4.94663	3.74267	1.18204	3.20232	2.78186	6.69906		1.28957	9.09301	3.93009			0.286605	0.623085	5.20696	0.39958		0.195277	0.119186	0.160014	0.0247421	0.571534	0.432428	0.136573	0.369997	0.321417	0.774011		0.148997	1.05061	0.454083			0.0331144	0.0719914	0.601613	0.0461676
	1.87372	1.17523	1.45643	1.01001	0.254359	1.79189	0.941558	8.44714	1.86284	7.43169		3.73222	3.71409				0.842052	0.85453		1.8938		0.21649	0.135786	0.168276	0.116697	0.0293887	0.207035	0.108788	0.975984	0.215232	0.858659		0.431221	0.429126				0.0972908	0.0987325		0.21881
	2.4852	1.22107	1.63828	3.04484	0.452183	0.221384	1.78712	4.56096	7.73591	7.72132		7.62061	1.20547				1.07198	1.19039		2.67069		0.287141	0.141082	0.189287	0.351801	0.0522452	0.0255787	0.206484	0.526974	0.893808	0.892123		0.880487	0.13928				0.123857	0.137538		0.308572
	2.68499	1.23361	1.8345	1.52126	3.27582	1.47265	0.338093	2.59338				4.47164	8.3273				8.77826	3.75815		1.63976		0.310224	0.142531	0.211958	0.175767	0.378489	0.17015	0.0390633	0.299639				0.516654	0.962138				1.01424	0.434218		0.189458
	2.86423	1.34042	1.87109	4.5515	1.65156	5.91372	0.249292					3.33312	5.76658				4.34921	1.28334		0.735496		0.330933	0.154872	0.216186	0.525881	0.190822	0.683272	0.0288033					0.38511	0.666271				0.502508	0.148278		0.0849793
	3.2026	1.42449	1.89738	1.64708	0.555929	0.366185	0.264512					1.12215	1.83628				3.79643	0.969025		7.96016		0.370029	0.164586	0.219223	0.190304	0.0642322	0.0423091	0.0305618					0.129653	0.212165				0.438641	0.111961		0.919718
	3.21657	1.47662	2.09552	1.41714	0.662977	1.83092	1.4187					0.81189	3.65188							4.75383		0.371643	0.170609	0.242117	0.163737	0.0766005	0.211544	0.163917					0.0938059	0.421939							0.549258
	3.29391	1.64591	2.24723	1.94425	0.377345	3.82138	4.2672						1.2969							1.48486		0.380579	0.190169	0.259646	0.224639	0.0435985	0.441522	0.493033						0.149844							0.171561
	3.83978	1.80161	2.8504	2.32415	0.442842	5.86893	1.12336													0.370606		0.443649	0.208158	0.329335	0.268533	0.0511661	0.678097	0.129793													0.0428198
	4.45189	1.8549	3.25244		1.08627	1.85103	1.03468													1.20953		0.514372	0.214315	0.375788		0.125508	0.213868	0.119547													0.139749
	4.54571	2.25353	3.42017		0.341663	2.95705	1.86978															0.525212	0.260373	0.395166		0.0394757	0.341658	0.216035
	6.88245	3.27932	3.63795		0.760215	2.96716	0.378677															0.7952	0.378894	0.420329		0.0878353	0.342826	0.0437524
	7.77118	3.87842	4.35963		0.189878	0.862106	6.70447															0.897884	0.448113	0.503713		0.0219385	0.0996079	0.774636
		3.93369	4.5229		0.543662	3.91428	1.63173																0.454499	0.522576		0.0628148	0.452257	0.18853
		4.34633	5.0433		0.523971		1.84078																0.502176	0.582704		0.0605397		0.212684
		4.49802	6.06727		0.167971		2.6135																0.519702	0.701013		0.0194074		0.301964
		4.68164	6.77159		0.835707		2.53775																0.540917	0.782391		0.0965577		0.293212
		5.799	7.71543		6.72525		7.58924																0.670018	0.891442		0.777037		0.876862
		7.44385			1.45987																		0.860064			0.168673
		8.85494			0.929504																		1.0231			0.107395
					1.8309																					0.211543
					0.889106																					0.102727
					0.526549																					0.0608375
					0.709055																					0.0819243
					2.18935																					0.252958
					0.525114																					0.0606718
					0.856555																					0.0989665
					0.610008																					0.0704804
					4.65795																					0.538181
					4.6161																					0.533345
					1.83787																					0.212348
					1.06965																					0.123588
					3.28475																					0.37952
					1.93333																					0.223377
					2.47166																					0.285576
					4.53558																					0.524041
					0.781099																					0.0902483
					1.57368																					0.181824
					0.95956																					0.110868
					0.425439																					0.0491553
[truncated: 40 more columns]

## Sheet: Circle 1
	A: Fracture trace lengths exported from ArcGIS																					D: Fracture trace lengths scaled to the field																					C: Summary fracture statistics by participant
	p1	p3	p11	p12	p13	p14	p15	p16	p17	p18	p19	p20	p21	p22	p23	p24	p25	p26	p27	p29		p1	p3	p11	p12	p13	p14	p15	p16	p17	p18	p19	p20	p21	p22	p23	p24	p25	p26	p27	p29		Attribute/statistic	p1	p3	p11	p12	p13	p14
	0.382986	0.17575	0.123887	0.746106	0.164148	1.93808	3.67808	1.35743	2.44991	5.86064	1.43706	6.05983	5.7915	8.60046	6.56003	5.88033	7.20809	5.94765	3.56905	4.55787		0.0443528	0.0203532	0.0143471	0.0864049	0.0190096	0.224445	0.42595	0.157201	0.283719	0.678708	0.166423	0.701775	0.6707	0.996	0.759703	0.680988	0.834753	0.688784	0.413323	0.527836		N	29	40	28	25	38	26
	0.403345	0.177596	0.165432	1.34488	0.719105	5.82585	0.98217	0.685144	5.82226	1.94453	0.718632	7.17737	7.54254	6.44659	1.82876	1.88992	0.884348	1.89836	6.52018	2.00167		0.0467104	0.020567	0.0191583	0.155748	0.083278	0.674678	0.113743	0.079345	0.674263	0.225192	0.0832231	0.831195	0.873484	0.746565	0.211785	0.218867	0.102414	0.219845	0.755088	0.231809		minimum tl	0.0443528	0.0203532	0.0143471	0.0379989	0.0190096	0.0205701
	0.575704	0.249676	0.210195	0.88902	0.483759	5.71258	0.737055	0.802838	0.731594	1.3275	6.53381	0.678205	8.72296	7.90777	1.48463	8.76201	5.94789	5.68275	6.19642	4.97695		0.066671	0.0289144	0.0243423	0.102955	0.056023	0.661561	0.0853567	0.0929749	0.0847242	0.153735	0.756666	0.0785414	1.01019	0.915781	0.171932	1.01471	0.688812	0.658106	0.717594	0.57637		maximum tl	0.754101	0.753472	1.02975	0.756871	0.705281	0.674678
	0.594754	0.250419	0.238592	6.53558	1.40687	1.96201	6.20817	3.84525	7.61092	7.54673	6.26169	2.3391	1.17315	7.4587	1.73412	3.94623	0.527667	1.87118	0.858833	0.86331		0.0688771	0.0290005	0.0276308	0.756871	0.162926	0.227216	0.718955	0.44531	0.881403	0.873969	0.725152	0.270886	0.13586	0.863776	0.200824	0.457004	0.061108	0.216697	0.0994596	0.0999779		range	0.709749	0.733118	1.01541	0.718872	0.686271	0.654108
	0.599164	0.26115	0.335688	0.77987	0.677324	1.2727	0.539954	6.00353	1.15491	4.09966	1.88575	4.97417	4.50342	5.77414	8.50792	6.60864	3.48039	0.277317	8.31161	1.25175		0.0693878	0.0302432	0.0388752	0.090315	0.0784393	0.147389	0.0625309	0.695256	0.133747	0.474773	0.218385	0.576047	0.521531	0.668691	0.985283	0.765332	0.403056	0.0321155	0.962549	0.144963		median	0.218421	0.129367	0.19401	0.217482	0.141537	0.221868
	0.690608	0.26836	0.346759	5.68926	4.84702	4.41338	0.799917	0.30698	1.21635	1.39128	1.86798	3.58749	6.5665	6.26912	6.58685	6.65575	5.07713	1.50635	1.92321	1.56488		0.0799777	0.0310782	0.0401574	0.658861	0.561323	0.511103	0.0926367	0.0355507	0.140863	0.161121	0.216326	0.415459	0.760452	0.726013	0.762808	0.770788	0.587971	0.174447	0.222723	0.181225		TL	0.283027	0.209147	0.285536	0.308916	0.228947	0.30756
	0.78664	0.330098	0.368895	1.62915	0.799268	4.21052	0.43932	0.373723	4.5142	4.95046	1.16392	0.762211	1.89747	5.88656	0.111888	1.92425	0.420824	4.09297	1.79744	4.43577		0.091099	0.0382279	0.0427209	0.188668	0.0925614	0.487611	0.0508766	0.0432801	0.522779	0.573302	0.134791	0.0882699	0.219741	0.68171	0.0129575	0.222843	0.0487346	0.473997	0.208157	0.513696		Total trace length	8.20778	8.36587	7.99501	7.7229	8.7	7.99656
	0.844563	0.333414	0.656486	0.32812	3.0074	0.7765	0.662134	3.24978	4.99539	6.37624	2.14516	0.885891	1.93061	3.41537	8.50405	7.44761	0.739758	1.89813	2.22426	1.39539		0.097807	0.0386119	0.0760261	0.0379989	0.34828	0.0899247	0.0766802	0.37635	0.578505	0.738418	0.248426	0.102593	0.22358	0.395526	0.984835	0.862491	0.0856698	0.219818	0.257587	0.161596		Circle Area	3.14159	3.14159	3.14159	3.14159	3.14159	3.14159
	0.872673	0.338883	0.663486	1.20007	2.01655	1.3475	5.65837	2.91057	2.19806	1.87522	0.28791	6.23581	6.05661	4.49807	2.04991	1.35813	5.11859	1.9441	7.42294	1.86941		0.101062	0.0392453	0.0768368	0.138977	0.233532	0.156051	0.655283	0.337067	0.254553	0.217165	0.0333422	0.722155	0.701403	0.520911	0.237395	0.157282	0.592772	0.225142	0.859634	0.216492		I	2.61262	2.66294	2.54489	2.45828	2.7693	2.54538
	0.882982	0.341454	0.752347	1.13714	1.2249	5.47241	0.742411	1.66596	8.12913	0.552438	1.2998	1.66683	7.31021		4.92781	4.49615	0.560638	0.41994	4.96532	8.07833		0.102256	0.0395431	0.0871276	0.13169	0.141853	0.633747	0.085977	0.192932	0.941416	0.0639766	0.150527	0.193031	0.846578		0.570679	0.520689	0.0649262	0.0486323	0.575023	0.935533		D	9.23099	12.7324	8.91268	7.95775	12.0958	8.27606
	0.916476	0.44735	0.940786	3.94792	1.89389	1.87616	5.86228	4.5112	1.87901	6.53747	0.872905	6.52144	0.784944		1.87814	5.0965	0.322073	1.3628	1.47317	1.11073		0.106135	0.0518065	0.10895	0.4572	0.219328	0.217274	0.678898	0.522432	0.217604	0.75709	0.101089	0.755233	0.0909026		0.217503	0.590215	0.0372985	0.157822	0.170605	0.128631
	0.932722	0.464282	1.00077	4.49941	0.552853	0.834723	0.585221	1.18601	4.2486	4.6767	0.671055	1.84203	0.606255		5.52574	4.57043	3.00883	4.99376	5.83443	5.61072		0.108016	0.0537675	0.115897	0.521066	0.0640247	0.0966674	0.0677731	0.137349	0.49202	0.541598	0.0777134	0.213322	0.0702091		0.639923	0.529291	0.348446	0.578316	0.675672	0.649765		References
	1.27635	0.495618	1.34584	1.87796	3.84817	0.699604	5.16807	5.10134	4.32447	3.55358	4.5405	1.93394	4.39384		5.76917		1.9341	4.5959	4.49807	1.86379		0.147811	0.0573964	0.155858	0.217482	0.445648	0.0810196	0.598503	0.590775	0.500807	0.411532	0.525825	0.223966	0.50884		0.668114		0.223984	0.532241	0.520911	0.215842		Zeeb, C., Gomez-Rivas, E., Bons, P.D. and Blum, P., 2013. Evaluation of sampling methods for fracture netowrk characterization using outcrops. AAPG bulletin, 97(9), pp. 1545-1566
	1.39875	0.620219	1.43694	5.67146	5.16883	0.404463	0.562711	1.91662	8.66674	6.37494	1.81011	4.54342	0.606825		2.39565		1.63469	4.0495	5.01386	4.6351		0.161986	0.0718262	0.166409	0.656799	0.59859	0.04684	0.0651662	0.22196	1.00368	0.738268	0.209625	0.526163	0.0702751		0.277435		0.18931	0.468964	0.580644	0.536781
	1.88607	0.652955	1.91361	1.85005	0.170866	0.888591	4.58675	4.08097	1.36953	0.133803	8.72916	3.9749	4.99858				0.844024	6.20971		4.44989		0.218421	0.0756172	0.221611	0.21425	0.0197876	0.102906	0.531181	0.472608	0.158602	0.0154954	1.0109	0.460325	0.578875				0.0977445	0.719133		0.515331
	1.89501	0.65999	1.91794	1.91381	1.30567	4.94861	0.38804	1.74868	6.85196	0.474551	1.9468	0.631837					2.01381	0.769928		3.60019		0.219456	0.076432	0.222112	0.221634	0.151206	0.573087	0.044938	0.202511	0.79351	0.0549567	0.225455	0.0731716					0.233215	0.0891636		0.41693
	1.89593	0.66036	1.9254	3.55184	0.484272	1.89358	1.31327	0.534908	0.473951	0.54756	5.95361	4.3917					6.86204	1.48848		1.0762		0.219563	0.0764748	0.222976	0.41133	0.0560825	0.219291	0.152086	0.0619465	0.0548872	0.0634117	0.689474	0.508592					0.794677	0.172378		0.124632
	1.93857	0.76956	1.98209	5.03415	1.21943	3.62543	0.738919	4.67082	0.758966	0.360186	1.90876	1.36494					1.15188	5.86859		0.787584		0.224501	0.0891211	0.229541	0.582993	0.14122	0.419853	0.0855725	0.540918	0.0878941	0.0417123	0.221049	0.158071					0.133396	0.679628		0.0912083
	3.64787	0.771357	2.79891	1.8893	1.13181	0.177623	4.67235	1.14888	2.37274	5.0895	4.74895	2.70041					6.11671	2.54945		6.83014		0.422452	0.0893292	0.324135	0.218796	0.131073	0.0205701	0.541094	0.133049	0.274782	0.589403	0.549966	0.312728					0.708363	0.295246		0.790983
	4.05078	1.08664	4.37805	5.86108	1.43864	3.10964	1.63239	1.93871	0.077845		4.49164	0.821744					0.608379	4.96008		0.489678		0.469111	0.125841	0.507012	0.678759	0.166606	0.36012	0.189043	0.224517	0.00901505		0.520166	0.0951643					0.0704551	0.574415		0.0567085
	4.14609	1.14752	4.37821	0.716271	0.317162	4.79868	0.596958	3.65144	0.866322		0.72944	0.677859					5.85352	2.61772		0.734636		0.48015	0.132892	0.507031	0.0829498	0.0367298	0.555725	0.0691324	0.422865	0.100327		0.0844748	0.0785014					0.677882	0.303152		0.0850765
	4.34749	1.23414	4.44388	0.809218	0.232839	1.28218	0.643486	4.55267	1.045		0.431646	5.13958					0.664998	1.48673		1.83097		0.503473	0.142923	0.514636	0.0937137	0.0269646	0.148487	0.0745207	0.527235	0.121019		0.049988	0.595203					0.077012	0.172174		0.21204
	4.35238	1.414	4.93215	0.611411	4.3469	0.654278	0.13426	1.92381			0.37695						0.858152	4.43627		5.00678		0.50404	0.163753	0.571181	0.0708062	0.503405	0.0757705	0.0155484	0.222792			0.0436537						0.0993806	0.513754		0.579824
	4.55053	1.4346	5.32352	4.89328	0.928373	5.65243	4.92503	1.87073			0.294744						5.22658					0.526986	0.166137	0.616505	0.566679	0.107513	0.654595	0.570356	0.216645			0.0341336						0.605279
	4.74411	1.5566	5.59338	3.2809	0.678164	4.86426	0.621018	1.04409			0.551358											0.549405	0.180266	0.647756	0.379954	0.0785366	0.563319	0.0719187	0.120914			0.0638515
	4.95962	1.66482	5.88069		5.03578	0.408532	0.78229	5.58074			0.78336											0.574362	0.192799	0.681029		0.583182	0.0473111	0.0905953	0.646293			0.0907192
	5.09456	1.91412	6.09104		0.900241		2.20193				0.551388											0.58999	0.22167	0.705389		0.104255		0.255001				0.063855
	5.69581	1.95822	8.89192		0.44694		5.43468				0.190237											0.659619	0.226777	1.02975		0.0517592		0.629378				0.0220309
	6.51166	2.20942			1.9388		6.35606				5.07116											0.754101	0.255868			0.224528		0.736081				0.587279
		2.70572			5.8988		0.106377				1.10036												0.313344			0.683127		0.0123193				0.12743
		2.96258			0.901587		1.93693																0.34309			0.104411		0.224311
		3.26061			4.48588		1.98999																0.377603			0.519499		0.230456
		3.56043			0.246076																		0.412325			0.0284975
		3.81853			1.2639																		0.442216			0.146369
		4.35287			3.37811																		0.504096			0.391212
		4.66434			5.1438																		0.540167			0.595692
		4.98953			6.0901																		0.577826			0.705281
		5.60463			0.330305																		0.649059			0.0382519
		5.92526																					0.686192
		6.50623																					0.753472
[truncated: 40 more columns]

## Sheet: Circle 4
	A: Exported trace lengths from ArcGIS								B: Data scaled to field circle								C: Summary fracture statistics by participant															D: Data for histogram, c.f. chart and normalised c.f. chart
	g6	g7	g8	g9	g10	g11	g12		g6	g7	g8	g9	g10	g11	g12		Attribute/statistic	g6	g7	g8	g9	g10	g11	g12	Median	min	max	range	CoV			Histogram data
	0.811224	0.582616	1.8724	7.59987	2.15794	2.95961	0.260997		0.206156	0.14806	0.475832	1.93135	0.548397	0.752124	0.0663271		N	26	29	17	15	11	13	28	17	11	29	18	0.764706			Bin (m)	g6	g7	g8	g9	g10	g11	g12
	4.98866	1.87958	7.46344	1.0361	5.10931	7.41829	0.135758		1.26777	0.477656	1.89668	0.263304	1.29843	1.88521	0.0345002		minimum tl	0.0486879	0.0230671	0.0415181	0.109071	0.103241	0.0642069	0.0345002	0.0486879	0.0230671	0.109071	0.0860034	0.938936			0	0	0	0	0	0	0	0
	0.99452	0.195732	1.00719	2.61692	7.53101	2.18035	0.177546		0.252737	0.0497413	0.255958	0.665037	1.91385	0.554091	0.0451196		maximum tl	1.90385	1.92303	1.89668	1.93135	1.92889	1.9499	1.89113	1.92303	1.89113	1.9499	0.0587654	0.0155264			0.1	2	4	3	0	0	1	5
	2.73855	4.69379	3.00395	4.98749	0.406254	1.11226	1.4044		0.695946	1.19283	0.763392	1.26747	0.103241	0.282657	0.356899		range	1.85516	1.89996	1.85516	1.82228	1.82565	1.88569	1.85663	1.85516	1.82228	1.89996	0.0776791	0.0165788			0.2	3	7	2	1	2	0	2
	1.04903	3.02416	5.04925	0.933764	4.85703	2.38375	0.970883		0.26659	0.76853	1.28316	0.237297	1.23432	0.605781	0.24673		median	0.363914	0.314626	0.597613	0.707127	0.706028	0.695355	0.270591	0.597613	0.270591	0.707127	0.436535	0.604775			0.3	7	3	1	2	0	1	9
	1.61104	5.00269	0.163374	0.429193	0.691245	7.67284	0.808489		0.409414	1.27133	0.0415181	0.109071	0.175666	1.9499	0.205461		TL	0.556839	0.475886	0.679569	0.833202	0.899097	0.882395	0.516447	0.679569	0.475886	0.899097	0.423211	0.472587			0.4	1	1	0	1	0	0	1
	7.47785	0.835722	0.291499	3.14301	7.59018	2.73622	0.885669		1.90034	0.212382	0.0740785	0.798731	1.92889	0.695355	0.225075		Total trace length	14.4778	13.8007	11.5527	12.498	9.89006	11.4711	14.4605	12.498	9.89006	14.4778	4.58776	0.209528			0.5	3	5	2	2	1	0	1
	2.49026	0.557055	0.754669	2.78254	3.47584	1.9847	0.980774		0.632848	0.141564	0.191784	0.707127	0.883315	0.504371	0.249244		Circle Area	3.14159	3.14159	3.14159	3.14159	3.14159	3.14159	3.14159	3.14159	3.14159	3.14159	0	0			0.6	1	2	1	0	1	3	0
	4.04568	0.090769	2.35161	6.45078	2.44994	5.98866	0.845319		1.02813	0.0230671	0.597613	1.63933	0.622603	1.52189	0.214821		I	4.60844	4.39289	3.67733	3.97825	3.1481	3.65138	4.60293	3.97825	3.1481	4.60844	1.46033	0.209528			0.7	3	1	1	1	1	2	1
	1.70244	4.23669	2.36665	1.86292	1.87042	3.16694	4.75721		0.43264	1.07667	0.601436	0.473424	0.475329	0.804812	1.20895		D	8.27606	9.23099	5.41127	4.77465	3.50141	4.13803	8.91268	5.41127	3.50141	9.23099	5.72958	0.764706			0.8	1	1	3	2	1	1	2
	2.18765	0.473033	1.79291	5.15551	2.77822	2.27624	1.09288		0.555945	0.120212	0.455631	1.31017	0.706028	0.578461	0.277734																	0.9	0	0	0	0	1	1	0
	0.69163	2.50677	0.297457	1.55666		0.252654	1.83863		0.175764	0.637044	0.0755926	0.395594		0.0642069	0.46725		References															1	0	0	0	1	0	0	1
	1.25296	1.23805	0.589833	5.17377		5.00642	4.64288		0.318414	0.314626	0.149894	1.31481		1.27228	1.17989		Zeeb, C., Gomez-Rivas, E., Bons, P.D. and Blum, P., 2013. Evaluation of sampling methods for fracture netowrk characterization using outcrops. AAPG bulletin, 97(9), pp. 1545-1566															1.1	1	1	0	0	0	0	2
	0.302744	1.65871	7.4151	3.78728			0.307945		0.0769362	0.421527	1.8844	0.962459			0.0782578																	1.2	0	1	0	0	0	0	1
	0.657094	7.56711	2.88089	1.66395			0.676775		0.166987	1.92303	0.73212	0.42286			0.171989																	1.3	2	1	1	1	2	1	2
	0.865191	1.78064	2.83008				0.308709		0.219871	0.452514	0.719208				0.0784521																	1.4	0	1	1	2	0	0	0
	7.49163	1.01272	5.3295				4.07712		1.90385	0.257361	1.35438				1.03612																	1.5	0	0	0	0	0	0	0
	0.842233	1.85133					2.65753		0.214036	0.470478					0.675358																	1.6	0	0	0	0	0	1	0
	0.756054	2.16464					0.758163		0.192136	0.550099					0.192672																	1.7	0	0	0	1	0	0	0
	4.95808	0.893492					4.27269		1.25999	0.227063					1.08582																	1.8	0	0	0	0	0	0	0
	2.8855	2.30116					3.75553		0.733291	0.584793					0.954391																	1.9	0	0	2	0	0	1	1
	1.90211	0.780852					7.4416		0.483382	0.198438					1.89113																	2	2	1	0	1	2	1	0
	0.843733	5.16324					1.17908		0.214418	1.31213					0.29964																	2.1	0	0	0	0	0	0	0
	0.851531	0.24936					1.03667		0.216399	0.0633698					0.263449																	Normalised c.f. chart data
	2.38127	0.772829					2.81848		0.605151	0.196399					0.71626																	Bin (m)	g6	g7	g8	g9	g10	g11	g12
	0.191587	0.189914					4.95223		0.0486879	0.0482627					1.25851																	0	0	0	0	0	0	0	0
		1.609					0.972779			0.408894					0.247212																	0.1	0.0769231	0.137931	0.176471	0	0	0.0769231	0.178571
		0.442721					2.88543			0.112509					0.733272																	0.2	0.192308	0.37931	0.294118	0.0666667	0.181818	0.0769231	0.25
		0.551303								0.140102																						0.3	0.461538	0.482759	0.352941	0.2	0.181818	0.153846	0.571429
																																0.4	0.5	0.517241	0.352941	0.266667	0.181818	0.153846	0.607143
																																0.5	0.615385	0.689655	0.470588	0.4	0.272727	0.153846	0.642857
																																0.6	0.653846	0.758621	0.529412	0.4	0.363636	0.384615	0.642857
																																0.7	0.769231	0.793103	0.588235	0.466667	0.454545	0.538462	0.678571
																																0.8	0.807692	0.827586	0.764706	0.6	0.545455	0.615385	0.75
																																0.9	0.807692	0.827586	0.764706	0.6	0.636364	0.692308	0.75
																																1	0.807692	0.827586	0.764706	0.666667	0.636364	0.692308	0.785714
																																1.1	0.846154	0.862069	0.764706	0.666667	0.636364	0.692308	0.857143
																																1.2	0.846154	0.896552	0.764706	0.666667	0.636364	0.692308	0.892857
																																1.3	0.923077	0.931034	0.823529	0.733333	0.818182	0.769231	0.964286
																																1.4	0.923077	0.965517	0.882353	0.866667	0.818182	0.769231	0.964286
																																1.5	0.923077	0.965517	0.882353	0.866667	0.818182	0.769231	0.964286
																																1.6	0.923077	0.965517	0.882353	0.866667	0.818182	0.846154	0.964286
																																1.7	0.923077	0.965517	0.882353	0.933333	0.818182	0.846154	0.964286
																																1.8	0.923077	0.965517	0.882353	0.933333	0.818182	0.846154	0.964286
																																1.9	0.923077	0.965517	1	0.933333	0.818182	0.923077	1
																																2	1	1	1	1	1	1	1
																																2.1	1	1	1	1	1	1	1
																																C.f. chart data
																																Bin (m)	g6	g7	g8	g9	g10	g11	g12
																																0	0	0	0	0	0	0	0
																																0.1	2	4	3	0	0	1	5
																																0.2	5	11	5	1	2	1	7
																																0.3	12	14	6	3	2	2	16
																																0.4	13	15	6	4	2	2	17
																																0.5	16	20	8	6	3	2	18
																																0.6	17	22	9	6	4	5	18
																																0.7	20	23	10	7	5	7	19
																																0.8	21	24	13	9	6	8	21
																																0.9	21	24	13	9	7	9	21
																																1	21	24	13	10	7	9	22
																																1.1	22	25	13	10	7	9	24
																																1.2	22	26	13	10	7	9	25
																																1.3	24	27	14	11	9	10	27
																																1.4	24	28	15	13	9	10	27
																																1.5	24	28	15	13	9	10	27
																																1.6	24	28	15	13	9	11	27
																																1.7	24	28	15	14	9	11	27
																																1.8	24	28	15	14	9	11	27
																																1.9	24	28	17	14	9	12	28
																																2	26	29	17	15	11	13	28
																																2.1	26	29	17	15	11	13	28

## Sheet: Circle 3
	A: Exported trace length from ArcGIS								B: Scaled fracture trace length								C: Summary fracture statistics by participant															D: Data for histogram, c.f. chart and normalised c.f. chart
	g6	g7	g8	g9	g10	g11	g12		g6	g7	g8	g9	g10	g11	g12		Attribute/statistic	g6	g7	g8	g9	g10	g11	g12	Median	min	max	range	CoV			Histogram data
	3.91718	7.94015	7.84651	3.73027	8.24295	3.58299	0.875532		0.908858	1.84226	1.82054	0.865493	1.91252	0.831321	0.20314		N	28	25	20	33	18	18	50	25	18	50	32	0.46			Bin (m)	g6	g7	g8	g9	g10	g11	g12
	0.490617	1.32678	1.36176	1.53377	1.09102	3.28187	1.57247		0.113832	0.307838	0.315954	0.355863	0.253136	0.761455	0.364841		minimum tl	0.0497642	0.0973401	0.0633598	0.0845892	0.218387	0.153771	0.0417968	0.0845892	0.0417968	0.218387	0.176591	0.815629			0	0	0	0	0	0	0	0
	0.955225	1.08012	1.36358	0.952014	1.71096	2.54794	0.720821		0.22163	0.250608	0.316375	0.220885	0.396974	0.59117	0.167244		maximum tl	1.97964	1.98632	1.82054	1.90957	2.00563	1.87545	1.89659	1.90957	1.82054	2.00563	0.185094	0.0507771			0.1	2	2	1	1	0	0	3
	2.85909	3.77227	1.03961	2.11005	0.94125	7.92456	0.180144		0.663361	0.875237	0.241209	0.489571	0.218387	1.83864	0.0417968		range	1.92988	1.88898	1.75718	1.82498	1.78724	1.72168	1.85479	1.82498	1.72168	1.92988	0.208199	0.0546171			0.2	5	0	3	5	0	1	16
	2.76233	8.56103	1.10741	1.41786	8.64426	1.02017	1.97109		0.640912	1.98632	0.25694	0.32897	2.00563	0.236699	0.45733		median	0.293733	0.307634	0.316165	0.355863	0.40868	0.70768	0.245567	0.316165	0.245567	0.70768	0.462114	0.258056			0.3	7	10	4	8	5	3	11
	2.68813	4.56718	1.10353	1.2589	4.78363	4.94343	0.524384		0.623696	1.05967	0.256039	0.292088	1.10989	1.14697	0.121667		TL	0.568227	0.6025	0.615592	0.504234	0.765277	0.855154	0.377954	0.6025	0.377954	0.855154	0.477201	0.25594			0.4	2	3	4	5	3	0	10
	6.20254	1.12704	0.465239	1.22287	2.784	4.75184	1.20814		1.43911	0.261494	0.107944	0.283727	0.64594	1.10252	0.28031		Total trace length	15.9104	15.0625	12.3118	16.6397	13.775	15.3928	18.8977	15.3928	12.3118	18.8977	6.58584	0.120595			0.5	0	1	0	4	2	0	2
	0.698148	2.02673	4.77383	2.87388	1.3731	2.66244	1.55024		0.161983	0.470239	1.10762	0.666794	0.318585	0.617735	0.359685		Circle Area	3.14159	3.14159	3.14159	3.14159	3.14159	3.14159	3.14159	3.14159	3.14159	3.14159	0	0			0.6	0	0	1	1	0	2	0
	4.07627	2.7033	1.30062	1.90467	7.70964	8.08318	0.407364		0.945771	0.627216	0.301769	0.441919	1.78878	1.87545	0.0945159		I	5.06442	4.79454	3.91898	5.29658	4.38471	4.89967	6.01532	4.89967	3.91898	6.01532	2.09634	0.120595			0.7	4	1	1	3	1	3	2
	1.0907	1.12716	0.273081	5.78456	1.40005	2.47009	1.08386		0.253063	0.261522	0.0633598	1.34213	0.324837	0.573106	0.251476		D	8.91268	7.95775	6.3662	10.5042	5.72958	5.72958	15.9155	7.95775	5.72958	15.9155	10.1859	0.46			0.8	1	0	0	1	1	2	1
	1.10327	0.969036	0.587244	1.1019	1.1797	3.22445	0.575447		0.255979	0.224834	0.136252	0.25566	0.273712	0.748132	0.133514																	0.9	0	3	0	1	0	1	0
	8.53225	1.34381	6.60071	0.45316	1.18228	2.86005	0.569247		1.97964	0.311789	1.53149	0.105141	0.274311	0.663585	0.132076		References															1	2	0	0	0	0	0	0
	0.699961	1.08307	7.14212	1.11845	4.80702	5.61994	0.575012		0.162404	0.251293	1.6571	0.259502	1.11532	1.30393	0.133413		Zeeb, C., Gomez-Rivas, E., Bons, P.D. and Blum, P., 2013. Evaluation of sampling methods for fracture netowrk characterization using outcrops. AAPG bulletin, 97(9), pp. 1545-1566															1.1	1	1	1	1	0	0	1
	0.248798	0.4233	0.89536	0.364579	1.74923	0.931793	1.16769		0.0577258	0.0982135	0.20774	0.0845892	0.405854	0.216193	0.270926																	1.2	1	1	1	0	2	2	1
	1.05383	4.86451	0.487924	1.5495	1.14445	7.84577	1.19903		0.244509	1.12866	0.113207	0.359512	0.265534	1.82036	0.278197																	1.3	0	0	1	0	0	0	0
	0.849798	3.66037	5.29171	1.12445	1.77359	2.87576	0.619155		0.197169	0.849274	1.22777	0.260893	0.411507	0.667229	0.143655																	1.4	0	0	0	1	1	1	0
	2.83665	8.16161	2.51159	8.23023	5.73765	1.05385	1.33937		0.658156	1.89365	0.582736	1.90957	1.33124	0.244512	0.310759																	1.5	1	0	0	0	0	0	1
	3.22059	1.05229	4.57407	0.970211	3.11539	0.662751	6.2933		0.747237	0.244151	1.06127	0.225107	0.722828	0.153771	1.46016																	1.6	0	0	1	0	0	0	0
	0.940073	0.419536	1.42118	1.22969			0.319551		0.218114	0.0973401	0.329739	0.285312			0.0741418																	1.7	0	0	1	0	0	0	0
	1.19109	3.54934	2.91694	0.468384			0.611021		0.276355	0.823512	0.676785	0.108674			0.141768																	1.8	0	0	0	1	1	0	0
	7.86207	1.3259		2.69938			0.471637		1.82415	0.307634		0.626306			0.109428																	1.9	1	2	1	0	0	3	2
	4.59911	0.893781		0.499608			1.03292		1.06708	0.207374		0.115918			0.239658																	2	1	1	0	1	1	0	0
	0.51502	1.17674		3.24924			0.977443		0.119494	0.273026		0.753884			0.226785																	2.1	0	0	0	0	1	0	0
	1.19235	0.865634		2.30714			8.17429		0.276646	0.200843		0.5353			1.89659																	2.2	0	0	0	0	0	0	0
	1.33963	0.898685		2.014			1.51418		0.31082	0.208512		0.467286			0.351318																	Normalised cumulative frequency chart data
	1.44676			1.98622			4.38866		0.335676			0.46084			1.01825																	Bin (m)	g6	g7	g8	g9	g10	g11	g12
	0.214483			0.700978			0.86649		0.0497642			0.16264			0.201042																	0	0	0	0	0	0	0	0
	4.98765			7.71916			1.59969		1.15723			1.79099			0.371158																	0.1	0.0714286	0.08	0.05	0.030303	0	0	0.06
				0.742376			0.924921					0.172245			0.214599																	0.2	0.25	0.08	0.2	0.181818	0	0.0555556	0.38
				2.89279			0.500098					0.67118			0.116032																	0.3	0.5	0.48	0.4	0.424242	0.277778	0.222222	0.6
				1.36951			0.622716					0.317751			0.144482																	0.4	0.571429	0.6	0.6	0.575758	0.444444	0.222222	0.8
				4.57027			0.435043					1.06039			0.100938																	0.5	0.571429	0.64	0.6	0.69697	0.555556	0.222222	0.84
				1.56706			2.64778					0.363587			0.614334																	0.6	0.571429	0.64	0.65	0.727273	0.555556	0.333333	0.84
							0.777843								0.180474																	0.7	0.714286	0.68	0.7	0.818182	0.611111	0.5	0.88
							0.936357								0.217252																	0.8	0.75	0.68	0.7	0.848485	0.666667	0.611111	0.9
							0.768378								0.178278																	0.9	0.75	0.8	0.7	0.878788	0.666667	0.666667	0.9
							1.39281								0.323159																	1	0.821429	0.8	0.7	0.878788	0.666667	0.666667	0.9
							2.01479								0.467468																	1.1	0.857143	0.84	0.75	0.909091	0.666667	0.666667	0.92
							3.20867								0.744471																	1.2	0.892857	0.88	0.8	0.909091	0.777778	0.777778	0.94
							1.70493								0.395575																	1.3	0.892857	0.88	0.85	0.909091	0.777778	0.777778	0.94
							4.75597								1.10347																	1.4	0.892857	0.88	0.85	0.939394	0.833333	0.833333	0.94
							1.42531								0.330698																	1.5	0.928571	0.88	0.85	0.939394	0.833333	0.833333	0.96
							7.82336								1.81516																	1.6	0.928571	0.88	0.9	0.939394	0.833333	0.833333	0.96
							0.587989								0.136424																	1.7	0.928571	0.88	0.95	0.939394	0.833333	0.833333	0.96
							1.26159								0.292711																	1.8	0.928571	0.88	0.95	0.969697	0.888889	0.833333	0.96
							0.767943								0.178177																	1.9	0.964286	0.96	1	0.969697	0.888889	1	1
							1.40372								0.32569																	2	1	1	1	1	0.944444	1	1
							2.77694								0.644302																	2.1	1	1	1	1	1	1	1
							0.725109								0.168239																	2.2	1	1	1	1	1	1	1
							1.59855								0.370894																	Cumulative frequency chart data
																																Bin (m)	g6	g7	g8	g9	g10	g11	g12
																																0	0	0	0	0	0	0	0
																																0.1	2	2	1	1	0	0	3
																																0.2	7	2	4	6	0	1	19
																																0.3	14	12	8	14	5	4	30
																																0.4	16	15	12	19	8	4	40
																																0.5	16	16	12	23	10	4	42
																																0.6	16	16	13	24	10	6	42
																																0.7	20	17	14	27	11	9	44
																																0.8	21	17	14	28	12	11	45
																																0.9	21	20	14	29	12	12	45
																																1	23	20	14	29	12	12	45
																																1.1	24	21	15	30	12	12	46
																																1.2	25	22	16	30	14	14	47
																																1.3	25	22	17	30	14	14	47
																																1.4	25	22	17	31	15	15	47
																																1.5	26	22	17	31	15	15	48
																																1.6	26	22	18	31	15	15	48
																																1.7	26	22	19	31	15	15	48
																																1.8	26	22	19	32	16	15	48
																																1.9	27	24	20	32	16	18	50
																																2	28	25	20	33	17	18	50
																																2.1	28	25	20	33	18	18	50
																																2.2	28	25	20	33	18	18	50
