# Supplementary material for: How do we see fractures? Quantifying subjective bias in fracture data collection
Source: Copernicus journal article supplement (doi:10.5194/se-10-487-2019), 2019-04-11
Supplement: Supplementary file [file se-10-487-2019-supplement-title-page.pdf › se-10-487-2019-supplement-title-page.pdf]

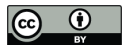

## *Supplement of*

# **How do we see fractures? Quantifying subjective bias in fracture data collection**

**Billy J. Andrews et al.**

*Correspondence to:* Billy J. Andrews ([billy.andrews@strath.ac.uk](mailto:billy.andrews@strath.ac.uk))

- [se-10-487-2019-supplement-title-page.pdf](#)
- [Resubmission\\_supplementary](#)
  - [Description of supplementary data.docx](#)
  - [S1\\_Participant Sheet.pdf](#)
  - [S2\\_Individual responses to the participant questionnaire.xlsx](#)
  - [S3\\_Individual exercises for workshop participants.pdf](#)
  - [S4\\_Group exercises for workshop participants.pdf](#)
  - [S5\\_Linear scanline data\\_ws and field\\_reviewedits.xlsx](#)
  - [S6\\_Field circular scanline data\\_reviewedits.xlsx](#)
  - [S7\\_Workshop circular scanline data\\_reviewer edits.xlsx](#)
  - [S8\\_Workshop window sampling data\\_review edits.xlsx](#)
  - [S9\\_Circle 8\\_sub.mpk](#)

The copyright of individual parts of the supplement might differ from the CC BY 4.0 License.
